# Supplementary material for: Acid-catalyzed, regioselective [3 + 3] annulation of enaminones and α-substituted cinnamic acids: access to 3,4-dihydropyridones and 2-piperidinones
Source: Royal Society of Chemistry journal article supplement (doi:10.1039/d1ob01115d), 2021-01-01

## Supporting Information

### **Acid-Catalyzed, Regioselective [3+3] Annulation of Enaminones and $\alpha$ -Substituted Cinnamic acids: Access to 3,4-Dihydropyridones and 2-Piperidinones**

Sivanna Chithanna,<sup>a</sup> Animesh Roy,<sup>a</sup> and Ding-Yah Yang<sup>a,b\*</sup>

<sup>a</sup>Department of Chemistry, Tunghai University

<sup>b</sup>Graduate Program for Biomedical and Materials Science, Tunghai University  
No. 1727, Sec. 4, Taiwan Boulevard, Xitun District, Taichung 407224, Taiwan

\*Corresponding author; Tel: 886-4-2359-7613; Fax: 886-4-2359-0426;

Email: [yang@thu.edu.tw](mailto:yang@thu.edu.tw)

## Table of Contents

|                                                                                                                                    |         |
|------------------------------------------------------------------------------------------------------------------------------------|---------|
| Instrumentation.....                                                                                                               | S3      |
| X-ray crystallographic data of compound <b>5a</b> , <b>5b</b> , <b>8c</b> , <b>9a</b> , <b>9e</b> , <b>25</b> and <b>27</b> ... .. | S4-S17  |
| General procedure A & spectral data of compound <b>5a–o</b> and <b>3</b> .....                                                     | S18-S27 |
| General procedure B & spectral data of compounds <b>8a–e</b> .....                                                                 | S27-S30 |
| General procedure C & spectral data of compounds <b>9a–e</b> .....                                                                 | S30-S32 |
| Procedure & spectral data of compound <b>14</b> .....                                                                              | S33     |
| Procedure & spectral data of compound <b>25</b> .....                                                                              | S33     |
| Procedure & spectral data of compound <b>26</b> .....                                                                              | S34     |
| Procedure & spectral data of compound <b>27</b> .....                                                                              | S34-35  |
| Reference.....                                                                                                                     | S35     |
| <sup>1</sup> H & <sup>13</sup> C NMR spectra for synthesized compounds.....                                                        | S36-S96 |

**Instrumentation:** Melting points were determined on a Mel-Temp melting point apparatus in open capillaries and are uncorrected. Infrared (IR) spectra were recorded using 1725XFT-IR spectrophotometer. High resolution mass spectra (HRMS) were obtained on a Thermo Fisher Scientific Finnigan MAT95XL spectrometer using magnetic sector analyzer. <sup>1</sup>H NMR (400 MHz) and <sup>13</sup>C NMR (100) spectra were recorded on a Bruker 400 spectrometer. Chemical shifts were reported in parts per million on the scale relative to an internal standard (tetramethylsilane, or appropriate solvent peaks) with coupling constants given in hertz. <sup>1</sup>H NMR multiplicity data are denoted by s (singlet), d (doublet), t (triplet), q (quartet), m (multiplet). Analytical thin-layer chromatography (TLC) was carried out on Merck silica gel 60G-254 plates (25 mm) and developed with the solvents mentioned. Visualization was accomplished by using portable UV light, ninhydrin spray, or iodine chamber. Flash chromatography was performed in columns of various diameters with Merck silica gel (230–400 mesh ASTM 9385 kieselgel 60H) by elution with the solvent systems. Solvents, unless otherwise specified, were reagent grade and distilled once prior to use. All new compounds exhibited satisfactory spectroscopic and analytical data.

X-ray crystallographic data of compound **5a** (CCDC-2071541)

Single crystal of **5a** was obtained by slow evaporation from a mixture of dichloromethane and *n*-hexane at 25 °C. Single-crystal X-ray data were collected at 150 K on a Bruker APEX-II CCD diffractometer using graphite-monochromated Mo KR radiation ( $\lambda = 0.71073\text{\AA}$ ). The crystal structures were solved by using SHELXS-97 and the structures were refined using SHELXL-97 2014. All non-hydrogen atoms were refined anisotropically. Hydrogen atoms were fixed at geometrically calculated positions and were refined using riding model.

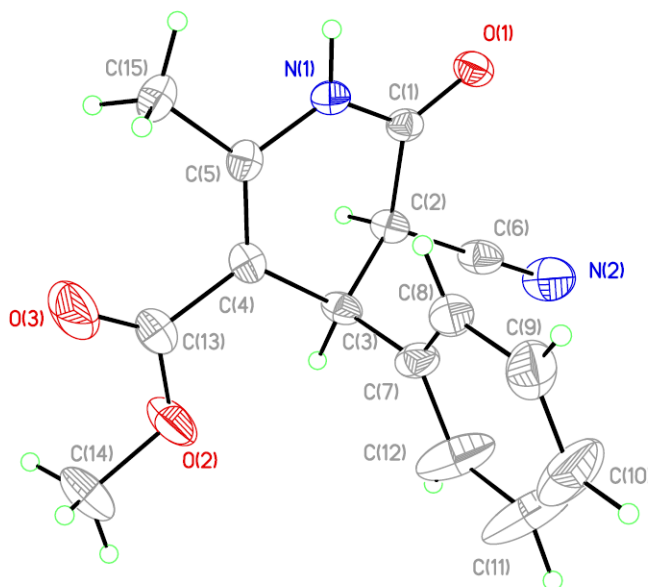

**Figure S1:** ORTEP diagram of compound **5a**. The ellipsoid contour probability levels: 50%

**Table S1.** Crystal data and structure refinement of compound **5a**.

|                                   |                                             |                 |
|-----------------------------------|---------------------------------------------|-----------------|
| Identification code               | CS577                                       |                 |
| Empirical formula                 | C15 H14 N2 O3                               |                 |
| Formula weight                    | 270.28                                      |                 |
| Temperature                       | 150(2) K                                    |                 |
| Wavelength                        | 0.71073 Å                                   |                 |
| Crystal system                    | Monoclinic                                  |                 |
| Space group                       | P2 <sub>1</sub> /c                          |                 |
| Unit cell dimensions              | a = 13.4631(9) Å                            | a = 90°.        |
|                                   | b = 11.5917(7) Å                            | b = 90.303(3)°. |
|                                   | c = 8.6603(6) Å                             | g = 90°.        |
| Volume                            | 1351.51(15) Å <sup>3</sup>                  |                 |
| Z                                 | 4                                           |                 |
| Density (calculated)              | 1.328 Mg/m <sup>3</sup>                     |                 |
| Absorption coefficient            | 0.094 mm <sup>-1</sup>                      |                 |
| F(000)                            | 568                                         |                 |
| Crystal size                      | 0.370 x 0.330 x 0.180 mm <sup>3</sup>       |                 |
| Theta range for data collection   | 2.936 to 27.895°.                           |                 |
| Index ranges                      | -17<=h<=17, -15<=k<=15, -11<=l<=11          |                 |
| Reflections collected             | 25167                                       |                 |
| Independent reflections           | 3201 [R(int) = 0.0488]                      |                 |
| Completeness to theta = 25.242°   | 99.1 %                                      |                 |
| Absorption correction             | Semi-empirical from equivalents             |                 |
| Max. and min. transmission        | 0.9281 and 0.8966                           |                 |
| Refinement method                 | Full-matrix least-squares on F <sup>2</sup> |                 |
| Data / restraints / parameters    | 3201 / 0 / 185                              |                 |
| Goodness-of-fit on F <sup>2</sup> | 1.008                                       |                 |
| Final R indices [I>2sigma(I)]     | R1 = 0.0587, wR2 = 0.1681                   |                 |
| R indices (all data)              | R1 = 0.0659, wR2 = 0.1767                   |                 |
| Extinction coefficient            | n/a                                         |                 |
| Largest diff. peak and hole       | 0.403 and -0.448 e.Å <sup>-3</sup>          |                 |

X-ray crystallographic data of compound **5b** (CCDC-2071542)

Single crystal of **5b** was obtained by slow evaporation from a mixture of dichloromethane and *n*-hexane at 25 °C. Single-crystal X-ray data were collected at 150 K on a Bruker APEX-II CCD diffractometer using graphite-monochromated Mo KR radiation ( $\lambda = 0.71073\text{\AA}$ ). The crystal structures were solved by using SHELXS-97 and the structures were refined using SHELXL-97 2014. All non-hydrogen atoms were refined anisotropically. Hydrogen atoms were fixed at geometrically calculated positions and were refined using riding model.

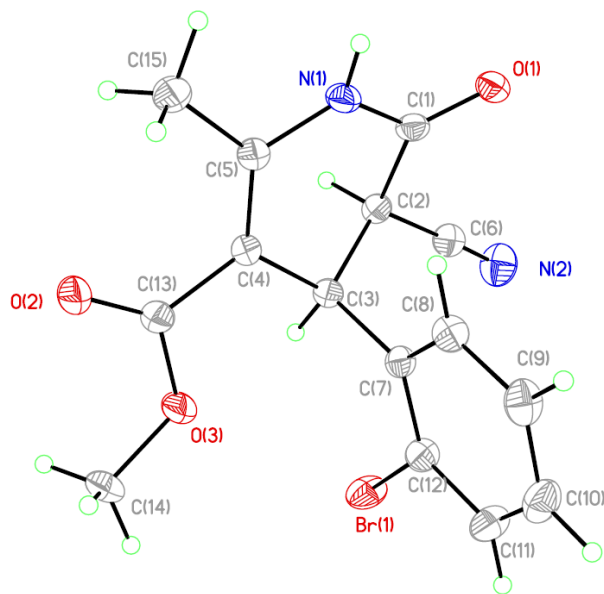

**Figure S2:** ORTEP diagram of compound **5b**. The ellipsoid contour probability levels: 50%

**Table S2.** Crystal data and structure refinement for compound **5b**.

|                                   |                                                                                                            |
|-----------------------------------|------------------------------------------------------------------------------------------------------------|
| Identification code               | CS-607                                                                                                     |
| Empirical formula                 | C <sub>15</sub> H <sub>13</sub> BrN <sub>2</sub> O <sub>3</sub>                                            |
| Formula weight                    | 349.18                                                                                                     |
| Temperature                       | 150(2) K                                                                                                   |
| Wavelength                        | 0.71073 Å                                                                                                  |
| Crystal system                    | Monoclinic                                                                                                 |
| Space group                       | P2 <sub>1</sub> /c                                                                                         |
| Unit cell dimensions              | a = 11.7353(7) Å      a = 90°.<br>b = 12.0789(8) Å      b = 104.410(2)°.<br>c = 10.6288(6) Å      g = 90°. |
| Volume                            | 1459.23(15) Å <sup>3</sup>                                                                                 |
| Z                                 | 4                                                                                                          |
| Density (calculated)              | 1.589 Mg/m <sup>3</sup>                                                                                    |
| Absorption coefficient            | 2.828 mm <sup>-1</sup>                                                                                     |
| F(000)                            | 704                                                                                                        |
| Crystal size                      | 0.410 x 0.170 x 0.120 mm <sup>3</sup>                                                                      |
| Theta range for data collection   | 3.426 to 27.901°.                                                                                          |
| Index ranges                      | -15<=h<=15, -15<=k<=15, -13<=l<=13                                                                         |
| Reflections collected             | 25829                                                                                                      |
| Independent reflections           | 3469 [R(int) = 0.0486]                                                                                     |
| Completeness to theta = 25.242°   | 99.5 %                                                                                                     |
| Absorption correction             | Semi-empirical from equivalents                                                                            |
| Max. and min. transmission        | 0.9281 and 0.7145                                                                                          |
| Refinement method                 | Full-matrix least-squares on F <sup>2</sup>                                                                |
| Data / restraints / parameters    | 3469 / 0 / 194                                                                                             |
| Goodness-of-fit on F <sup>2</sup> | 1.012                                                                                                      |
| Final R indices [I>2sigma(I)]     | R1 = 0.0273, wR2 = 0.0780                                                                                  |
| R indices (all data)              | R1 = 0.0333, wR2 = 0.0832                                                                                  |
| Extinction coefficient            | n/a                                                                                                        |
| Largest diff. peak and hole       | 0.764 and -0.790 e.Å <sup>-3</sup>                                                                         |

X-ray crystallographic data of compound **8c** (CCDC-2071539)

Single crystal of **8c** was obtained by slow evaporation from a mixture of dichloromethane and *n*-hexane at 25 °C. Single-crystal X-ray data were collected at 150 K on a Bruker APEX-II CCD diffractometer using graphite-monochromated Mo KR radiation ( $\lambda = 0.71073\text{\AA}$ ). The crystal structures were solved by using SHELXS-97 and the structures were refined using SHELXL-97 2014. All non-hydrogen atoms were refined anisotropically. Hydrogen atoms were fixed at geometrically calculated positions and were refined using riding model.

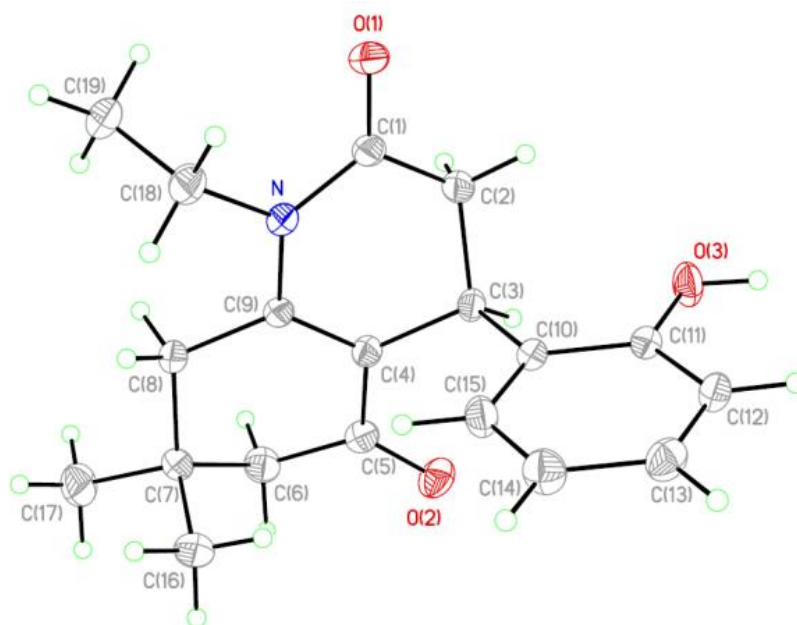

**Figure S3:** ORTEP diagram of compound **8c**. The ellipsoid contour probability levels: 50%



**Table S3.** Crystal data and structure refinement for compound **8c**.

|                                   |                                                 |                  |
|-----------------------------------|-------------------------------------------------|------------------|
| Identification code               | CS-538                                          |                  |
| Empirical formula                 | C <sub>19</sub> H <sub>23</sub> NO <sub>3</sub> |                  |
| Formula weight                    | 313.38                                          |                  |
| Temperature                       | 150(2) K                                        |                  |
| Wavelength                        | 0.71073 Å                                       |                  |
| Crystal system                    | Monoclinic                                      |                  |
| Space group                       | P2 <sub>1</sub> /c                              |                  |
| Unit cell dimensions              | a = 12.8358(6) Å                                | a = 90°.         |
|                                   | b = 9.6075(6) Å                                 | b = 115.331(2)°. |
|                                   | c = 14.3495(8) Å                                | g = 90°.         |
| Volume                            | 1599.43(16) Å <sup>3</sup>                      |                  |
| Z                                 | 4                                               |                  |
| Density (calculated)              | 1.301 Mg/m <sup>3</sup>                         |                  |
| Absorption coefficient            | 0.088 mm <sup>-1</sup>                          |                  |
| F(000)                            | 672                                             |                  |
| Crystal size                      | 0.340 x 0.330 x 0.240 mm <sup>3</sup>           |                  |
| Theta range for data collection   | 2.869 to 27.870°.                               |                  |
| Index ranges                      | -16<=h<=16, -12<=k<=12, -18<=l<=18              |                  |
| Reflections collected             | 32456                                           |                  |
| Independent reflections           | 3793 [R(int) = 0.0489]                          |                  |
| Completeness to theta = 25.242°   | 99.3 %                                          |                  |
| Absorption correction             | Semi-empirical from equivalents                 |                  |
| Max. and min. transmission        | 0.9281 and 0.8623                               |                  |
| Refinement method                 | Full-matrix least-squares on F <sup>2</sup>     |                  |
| Data / restraints / parameters    | 3793 / 0 / 212                                  |                  |
| Goodness-of-fit on F <sup>2</sup> | 1.027                                           |                  |
| Final R indices [I>2sigma(I)]     | R1 = 0.0413, wR2 = 0.1108                       |                  |
| R indices (all data)              | R1 = 0.0478, wR2 = 0.1186                       |                  |
| Extinction coefficient            | n/a                                             |                  |
| Largest diff. peak and hole       | 0.357 and -0.197 e.Å <sup>-3</sup>              |                  |

X-ray crystallographic data of compound **9a** (CCDC-2071540)

Single crystal of **9a** was obtained by slow evaporation from a mixture of methanol and dichloromethane at 25 °C. Single-crystal X-ray data were collected at 150 K on a Bruker APEX-II CCD diffractometer using graphite-monochromated Mo KR radiation ( $\lambda = 0.71073\text{\AA}$ ). The crystal structures were solved by using SHELXS-97 and the structures were refined using SHELXL-97 2014. All non-hydrogen atoms were refined anisotropically. Hydrogen atoms were fixed at geometrically calculated positions and were refined using riding model.

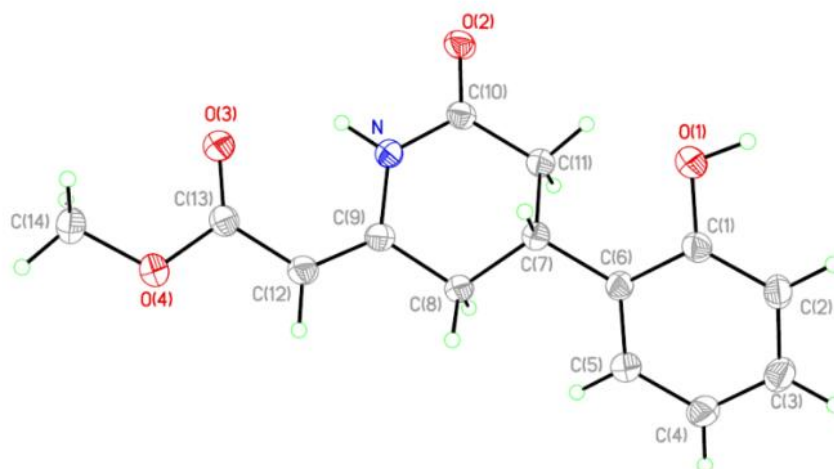

**Figure S4:** ORTEP diagram of compound **9a**. The ellipsoid contour probability levels: 50%

**Table S4.** Crystal data and structure refinement for compound **9a**.

|                                   |                                                                                                           |
|-----------------------------------|-----------------------------------------------------------------------------------------------------------|
| Identification code               | CS-547A                                                                                                   |
| Empirical formula                 | C <sub>14</sub> H <sub>15</sub> NO <sub>4</sub>                                                           |
| Formula weight                    | 261.27                                                                                                    |
| Temperature                       | 150(2) K                                                                                                  |
| Wavelength                        | 0.71073 Å                                                                                                 |
| Crystal system                    | Monoclinic                                                                                                |
| Space group                       | P2 <sub>1</sub> /n                                                                                        |
| Unit cell dimensions              | a = 8.0107(5) Å      a = 90°.<br>b = 14.7221(9) Å      b = 102.468(3)°.<br>c = 10.7274(7) Å      g = 90°. |
| Volume                            | 1235.29(14) Å <sup>3</sup>                                                                                |
| Z                                 | 4                                                                                                         |
| Density (calculated)              | 1.405 Mg/m <sup>3</sup>                                                                                   |
| Absorption coefficient            | 0.104 mm <sup>-1</sup>                                                                                    |
| F(000)                            | 552                                                                                                       |
| Crystal size                      | 0.470 x 0.260 x 0.230 mm <sup>3</sup>                                                                     |
| Theta range for data collection   | 3.208 to 27.881°.                                                                                         |
| Index ranges                      | -10<=h<=10, -19<=k<=19, -14<=l<=14                                                                        |
| Reflections collected             | 22665                                                                                                     |
| Independent reflections           | 2930 [R(int) = 0.0519]                                                                                    |
| Completeness to theta = 25.242°   | 99.4 %                                                                                                    |
| Absorption correction             | Semi-empirical from equivalents                                                                           |
| Max. and min. transmission        | 0.9281 and 0.8768                                                                                         |
| Refinement method                 | Full-matrix least-squares on F <sup>2</sup>                                                               |
| Data / restraints / parameters    | 2930 / 0 / 180                                                                                            |
| Goodness-of-fit on F <sup>2</sup> | 1.039                                                                                                     |
| Final R indices [I>2sigma(I)]     | R1 = 0.0391, wR2 = 0.1117                                                                                 |
| R indices (all data)              | R1 = 0.0513, wR2 = 0.1295                                                                                 |
| Extinction coefficient            | n/a                                                                                                       |
| Largest diff. peak and hole       | 0.292 and -0.184 e.Å <sup>-3</sup>                                                                        |

X-ray crystallographic data of compound **9e** (CCDC-2078427)

Single crystal of **9e** was obtained by slow evaporation from a mixture of methanol and dichloromethane at 25 °C. Single-crystal X-ray data were collected at 150 K on a Bruker APEX-II CCD diffractometer using graphite-monochromated Mo KR radiation ( $\lambda = 0.71073\text{\AA}$ ). The crystal structures were solved by using SHELXS-97 and the structures were refined using SHELXL-97 2014. All non-hydrogen atoms were refined anisotropically. Hydrogen atoms were fixed at geometrically calculated positions and were refined using riding model.

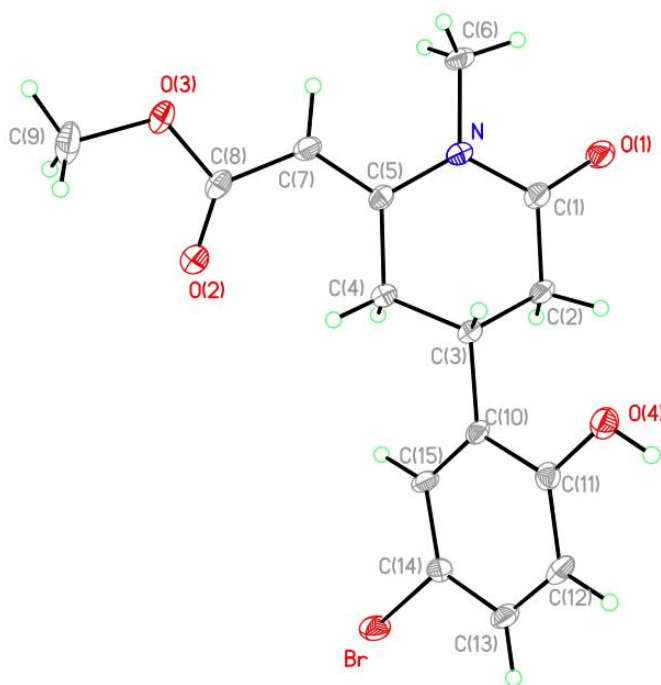

**Figure S5:** ORTEP diagram of compound **9a**. The ellipsoid contour probability levels: 50%

**Table S5.** Crystal data and structure refinement for compound **9e**.

|                                   |                                                                                                          |
|-----------------------------------|----------------------------------------------------------------------------------------------------------|
| Identification code               | CS-619                                                                                                   |
| Empirical formula                 | C <sub>15</sub> H <sub>16</sub> BrNO <sub>4</sub>                                                        |
| Formula weight                    | 354.20                                                                                                   |
| Temperature                       | 150(2) K                                                                                                 |
| Wavelength                        | 0.71073 Å                                                                                                |
| Crystal system                    | Monoclinic                                                                                               |
| Space group                       | P2/n                                                                                                     |
| Unit cell dimensions              | a = 9.2266(7) Å      a = 90°.<br>b = 8.5709(7) Å      b = 92.636(4)°.<br>c = 18.4502(15) Å      g = 90°. |
| Volume                            | 1457.5(2) Å <sup>3</sup>                                                                                 |
| Z                                 | 4                                                                                                        |
| Density (calculated)              | 1.614 Mg/m <sup>3</sup>                                                                                  |
| Absorption coefficient            | 2.836 mm <sup>-1</sup>                                                                                   |
| F(000)                            | 720                                                                                                      |
| Crystal size                      | 0.500 x 0.220 x 0.200 mm <sup>3</sup>                                                                    |
| Theta range for data collection   | 3.246 to 28.108°.                                                                                        |
| Index ranges                      | -12<=h<=12, -11<=k<=11, -24<=l<=24                                                                       |
| Reflections collected             | 27590                                                                                                    |
| Independent reflections           | 3525 [R(int) = 0.0715]                                                                                   |
| Completeness to theta = 25.242°   | 99.5 %                                                                                                   |
| Absorption correction             | Semi-empirical from equivalents                                                                          |
| Max. and min. transmission        | 0.7456 and 0.4626                                                                                        |
| Refinement method                 | Full-matrix least-squares on F <sup>2</sup>                                                              |
| Data / restraints / parameters    | 3525 / 0 / 206                                                                                           |
| Goodness-of-fit on F <sup>2</sup> | 1.064                                                                                                    |
| Final R indices [I>2sigma(I)]     | R1 = 0.0509, wR2 = 0.1410                                                                                |
| R indices (all data)              | R1 = 0.0576, wR2 = 0.1483                                                                                |
| Extinction coefficient            | n/a                                                                                                      |
| Largest diff. peak and hole       | 2.472 and -1.078 e.Å <sup>-3</sup>                                                                       |

X-ray crystallographic data of compound **25** (CCDC- 2077711)

Single crystal of **25** was obtained by slow evaporation from a mixture of dichloromethane and *n*-hexane at 25 °C. Single-crystal X-ray data were collected at 150 K on a Bruker APEX-II CCD diffractometer using graphite-monochromated Mo KR radiation ( $\lambda = 0.71073\text{\AA}$ ). The crystal structures were solved by using SHELXS-97 and the structures were refined using SHELXL-97 2014. All non-hydrogen atoms were refined anisotropically. Hydrogen atoms were fixed at geometrically calculated positions and were refined using riding model.

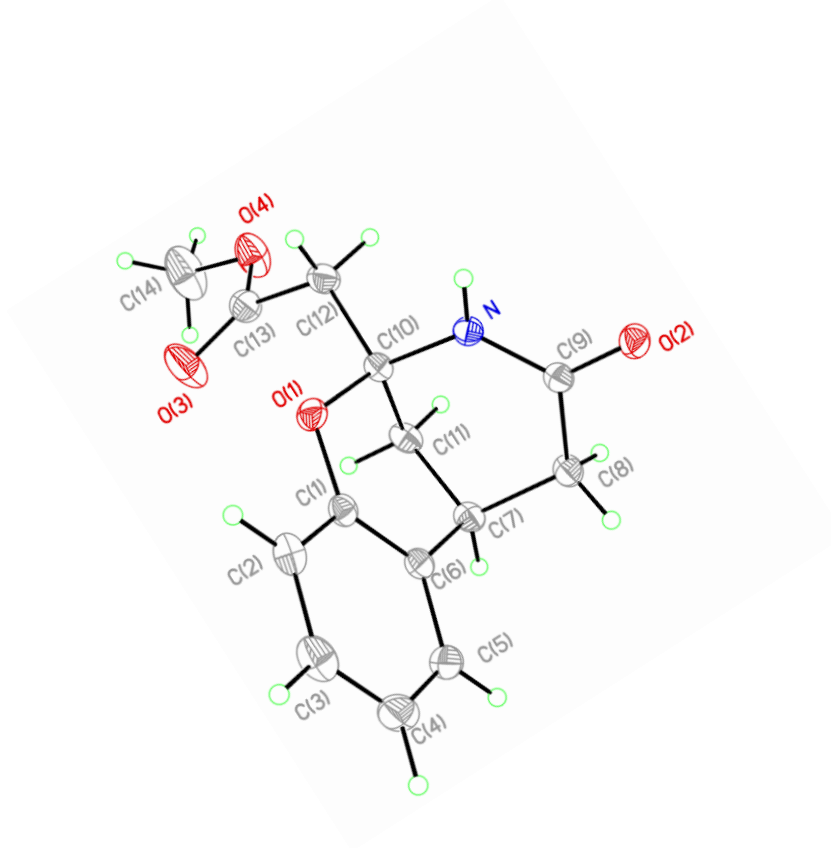

**Figure S6:** ORTEP diagram of compound **25**. The ellipsoid contour probability levels: 50%

**Table S6.** Crystal data and structure refinement for compound **25**.

|                                   |                                                                                                          |
|-----------------------------------|----------------------------------------------------------------------------------------------------------|
| Identification code               | CS-547B                                                                                                  |
| Empirical formula                 | C <sub>14</sub> H <sub>15</sub> NO <sub>4</sub>                                                          |
| Formula weight                    | 261.27                                                                                                   |
| Temperature                       | 150(2) K                                                                                                 |
| Wavelength                        | 0.71073 Å                                                                                                |
| Crystal system                    | Monoclinic                                                                                               |
| Space group                       | P2 <sub>1</sub> /n                                                                                       |
| Unit cell dimensions              | a = 9.1578(6) Å      a = 90°.<br>b = 8.0660(5) Å      b = 95.892(3)°.<br>c = 17.2518(10) Å      g = 90°. |
| Volume                            | 1267.60(14) Å <sup>3</sup>                                                                               |
| Z                                 | 4                                                                                                        |
| Density (calculated)              | 1.369 Mg/m <sup>3</sup>                                                                                  |
| Absorption coefficient            | 0.101 mm <sup>-1</sup>                                                                                   |
| F(000)                            | 552                                                                                                      |
| Crystal size                      | 0.320 x 0.310 x 0.190 mm <sup>3</sup>                                                                    |
| Theta range for data collection   | 3.374 to 27.925°.                                                                                        |
| Index ranges                      | -12 ≤ h ≤ 12, -10 ≤ k ≤ 10, -22 ≤ l ≤ 22                                                                 |
| Reflections collected             | 23984                                                                                                    |
| Independent reflections           | 2997 [R(int) = 0.0478]                                                                                   |
| Completeness to theta = 25.242°   | 98.7 %                                                                                                   |
| Absorption correction             | Semi-empirical from equivalents                                                                          |
| Max. and min. transmission        | 0.7456 and 0.6560                                                                                        |
| Refinement method                 | Full-matrix least-squares on F <sup>2</sup>                                                              |
| Data / restraints / parameters    | 2997 / 0 / 176                                                                                           |
| Goodness-of-fit on F <sup>2</sup> | 1.046                                                                                                    |
| Final R indices [I > 2σ(I)]       | R1 = 0.0419, wR2 = 0.1230                                                                                |
| R indices (all data)              | R1 = 0.0452, wR2 = 0.1273                                                                                |
| Extinction coefficient            | n/a                                                                                                      |
| Largest diff. peak and hole       | 0.405 and -0.182 e.Å <sup>-3</sup>                                                                       |

X-ray crystallographic data of compound **27** (CCDC-2088154)

Single crystal of **27** was obtained by slow evaporation from a mixture of dichloromethane and *n*-hexane at 25 °C. Single-crystal X-ray data were collected at 150 K on a Bruker APEX-II CCD diffractometer using graphite-monochromated Mo KR radiation ( $\lambda = 0.71073\text{\AA}$ ). The crystal structures were solved by using SHELXS-97 and the structures were refined using SHELXL-97 2014. All non-hydrogen atoms were refined anisotropically. Hydrogen atoms were fixed at geometrically calculated positions and were refined using riding model.

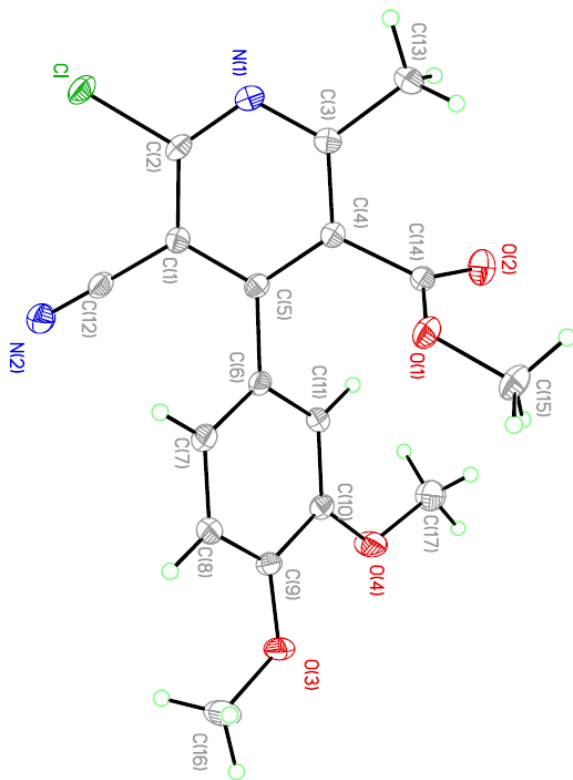

**Figure S7:** ORTEP diagram of compound **27**. The ellipsoid contour probability levels: 50%



**Table S7.** Crystal data and structure refinement for compound **27**.

|                                   |                                                                  |                 |
|-----------------------------------|------------------------------------------------------------------|-----------------|
| Identification code               | CS-629                                                           |                 |
| Empirical formula                 | C <sub>17</sub> H <sub>15</sub> Cl N <sub>2</sub> O <sub>4</sub> |                 |
| Formula weight                    | 346.76                                                           |                 |
| Temperature                       | 150(2) K                                                         |                 |
| Wavelength                        | 0.71073 Å                                                        |                 |
| Crystal system                    | Monoclinic                                                       |                 |
| Space group                       | P2 <sub>1</sub> /c                                               |                 |
| Unit cell dimensions              | a = 7.5619(5) Å                                                  | a = 90°.        |
|                                   | b = 7.8517(5) Å                                                  | b = 96.461(3)°. |
|                                   | c = 26.9250(17) Å                                                | g = 90°.        |
| Volume                            | 1588.49(18) Å <sup>3</sup>                                       |                 |
| Z                                 | 4                                                                |                 |
| Density (calculated)              | 1.450 Mg/m <sup>3</sup>                                          |                 |
| Absorption coefficient            | 0.265 mm <sup>-1</sup>                                           |                 |
| F(000)                            | 720                                                              |                 |
| Crystal size                      | 0.510 x 0.350 x 0.210 mm <sup>3</sup>                            |                 |
| Theta range for data collection   | 2.704 to 27.894°.                                                |                 |
| Index ranges                      | -9<=h<=9, -10<=k<=9, -35<=l<=35                                  |                 |
| Reflections collected             | 28899                                                            |                 |
| Independent reflections           | 3767 [R(int) = 0.0457]                                           |                 |
| Completeness to theta = 25.242°   | 99.2 %                                                           |                 |
| Absorption correction             | Semi-empirical from equivalents                                  |                 |
| Max. and min. transmission        | 0.7456 and 0.6291                                                |                 |
| Refinement method                 | Full-matrix least-squares on F <sup>2</sup>                      |                 |
| Data / restraints / parameters    | 3767 / 0 / 229                                                   |                 |
| Goodness-of-fit on F <sup>2</sup> | 1.053                                                            |                 |
| Final R indices [I>2sigma(I)]     | R1 = 0.0341, wR2 = 0.0888                                        |                 |
| R indices (all data)              | R1 = 0.0357, wR2 = 0.0898                                        |                 |
| Extinction coefficient            | n/a                                                              |                 |
| Largest diff. peak and hole       | 0.383 and -0.222 e.Å <sup>-3</sup>                               |                 |

General procedure A for preparation of compounds **5a–h**.

To a stirred solution of commercially available enamine **1** (0.5 mmol) and  $\alpha,\beta$ -unsaturated carboxylic acid **4** (0.5 mmol) in dry toluene (5 mL) was added boric acid (5 mol%) at room temperature. The resulting mixture was refluxed for 3 h. After completion of the reaction, the solution was evaporated and the residue was diluted with ethyl acetate (100 mL), washed with water (30 mL) and brine (30 mL). The organic layer was then dried over anhydrous  $\text{MgSO}_4$  and concentrated under reduced pressure to provide the crude product which was further purified by column chromatography to obtain the desired compound.

**Methyl 5-cyano-2-methyl-6-oxo-4-phenyl-1,4,5,6-tetrahydropyridine-3-carboxylate (5a).**

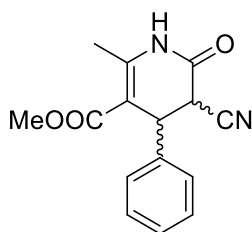

The title compound **5a** was synthesized by following general procedure A from enamine **1a** (58.0 mg, 0.5 mmol), (*E*)-2-cyano-3-phenylacrylic acid (**4a**, 87 mg, 0.5 mmol), boric acid (5 mol%) and purified by flash column chromatography (40% EtOAc in hexanes) to give a white solid (120 mg, 89% yield).  $R_f = 0.5$  (50% EtOAc/hexanes). (*Cis* diastereomer)  $^1\text{H}$  NMR (DMSO- $d_6$ , 400 MHz)  $\delta$ : 10.54 (s, 1H), 7.37–7.28 (m, 3H), 7.20–7.18 (m, 2H), 4.93 (d,  $J = 6.8$  Hz, 1H), 4.34 (d,  $J = 6.8$  Hz, 1H), 3.56 (s, 3H), 2.34 (s, 3H).  $^{13}\text{C}\{^1\text{H}\}$  NMR (DMSO- $d_6$ , 100 MHz)  $\delta$ : 166.4, 163.5, 148.4, 138.0, 129.2 (2C), 128.4, 128.1 (2C), 116.1, 105.8, 51.8, 41.2, 41.1, 18.6. IR  $\nu_{\text{max}}$  (neat): 3130, 2230, 1628, 1416, 1279, 792, 635  $\text{cm}^{-1}$ . (*Trans* diastereomer)  $^1\text{H}$  NMR (DMSO- $d_6$ , 400 MHz)  $\delta$ : 10.65 (s, 1H), 7.37–7.28 (m, 3H), 7.25–7.23 (m, 2H), 4.50 (d,  $J = 3.2$  Hz, 1H), 4.14 (d,  $J = 3.2$  Hz, 1H), 3.56 (s, 3H), 2.39 (s, 3H).  $^{13}\text{C}\{^1\text{H}\}$  NMR (DMSO- $d_6$ , 100 MHz)  $\delta$ : 166.7, 162.0, 148.3, 138.3, 129.3 (2C), 128.2, 127.5 (2C), 117.1, 104.3, 51.9, 42.1, 40.7, 18.4. HRMS (EI)  $m/z$ :  $[\text{M}^+]$  calcd for  $\text{C}_{15}\text{H}_{14}\text{N}_2\text{O}_3$ , 270.1004; found, 270.1006.

**Methyl 4-(2-bromophenyl)-5-cyano-2-methyl-6-oxo-1,4,5,6-tetrahydropyridine-3-carboxylate (5b).**

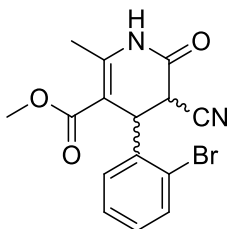

The title compound **5b** was synthesized by following general procedure A from enamine **1a** (58 mg, 0.5 mmol), (*E*)-3-(2-bromophenyl)-2-cyanoacrylic acid (**4b**, 126 mg, 0.55 mmol), boric acid (5 mol%) and purified by flash column chromatography (30% EtOAc in hexanes) to give a white solid (162 mg, 93% yield).  $R_f = 0.5$  (40% EtOAc/hexanes). (*Cis* diastereomer)  $^1\text{H}$  NMR ( $\text{CDCl}_3$ , 400 MHz)  $\delta$ : 8.04 (s, 1H), 7.65 (dd,  $J = 8.0, 1.2$  Hz, 1H), 7.26 (td,  $J = 8.0, 1.2$  Hz, 1H), 7.18 (td,  $J = 8.0, 2.0$  Hz, 1H), 7.13 (dd,  $J = 8.0, 2.0$  Hz, 1H), 5.24 (d,  $J = 8.0$  Hz, 1H), 4.15 (d,  $J = 8.0$  Hz, 1H), 3.65 (s, 3H), 2.46 (s, 3H).  $^{13}\text{C}\{^1\text{H}\}$  NMR ( $\text{DMSO-}d_6$ , 100 MHz)  $\delta$ : 166.3, 162.6, 148.1, 137.7, 133.1, 129.5, 128.1, 127.6, 125.0, 114.1, 106.0, 50.5, 47.6, 39.6, 17.0. IR  $\nu_{\text{max}}$  (neat): 3133, 2228, 1628, 1412, 1285, 792, 625  $\text{cm}^{-1}$ . (*Trans* diastereomer)  $^1\text{H}$  NMR ( $\text{CDCl}_3$ , 400 MHz)  $\delta$ : 8.00 (s, 1H), 7.64 (dd,  $J = 8.0, 1.2$  Hz, 1H), 7.26 (td,  $J = 8.0, 1.2$  Hz, 1H), 7.16 (td,  $J = 8.0, 2.0$  Hz, 1H), 6.99 (dd,  $J = 8.0, 2.0$  Hz, 1H), 5.00 (d,  $J = 2.0$  Hz, 1H), 3.77 (d,  $J = 2.0$  Hz, 1H), 3.66 (s, 3H), 2.56 (s, 3H).  $^{13}\text{C}\{^1\text{H}\}$  NMR ( $\text{DMSO-}d_6$ , 100 MHz)  $\delta$ : 165.8, 161.1, 149.2, 135.9, 133.6, 129.8, 128.0, 127.4, 123.8, 115.2, 103.3, 50.8, 47.8, 42.5, 13.1. HRMS (EI)  $m/z$ :  $[\text{M}^+]$  calcd for  $\text{C}_{15}\text{H}_{13}\text{BrN}_2\text{O}_3$ , 348.0110; found, 348.0113.

**Methyl 5-cyano-2-methyl-4-(naphthalen-1-yl)-6-oxo-1,4,5,6-tetrahydropyridine-3-carboxylate (5c).**

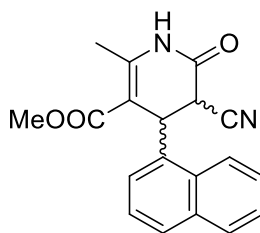

The title compound **5c** was synthesized by following general procedure A from enamine **1a** (58.0 mg, 0.5 mmol), (*E*)-2-cyano-3-(naphthalen-1-yl)acrylic acid (**4c**, 112 mg, 0.55 mmol), boric acid (5 mol%) and purified by flash column chromatography (50% EtOAc in hexanes) to give a white solid (120 mg, 87% yield).  $R_f = 0.5$  (50% EtOAc/hexanes). (*Cis* diastereomer)  $^1\text{H}$  NMR ( $\text{CDCl}_3$ , 400 MHz)  $\delta$ : 10.60 (s, 1H), 8.41 (d,  $J = 8.0$  Hz, 1H), 7.94 (d,  $J = 8.0$  Hz, 1H), 7.89 (t,  $J = 8.0$  Hz, 1H), 7.63–7.57 (m, 1H), 7.54 (t,  $J = 6.8$  Hz, 1H), 7.48–7.43 (m, 1H), 7.27 (d,  $J = 6.8$  Hz, 1H), 5.49 (d,  $J = 7.2$  Hz, 1H), 4.98 (d,  $J = 7.2$  Hz, 1H), 3.41 (s, 3H), 2.40 (s, 3H).  $^{13}\text{C}\{^1\text{H}\}$  NMR ( $\text{DMSO-}d_6$ , 100 MHz)  $\delta$ : 166.6, 163.4, 148.6, 135.3, 134.0, 132.0, 128.9, 128.9, 126.5, 126.3, 126.0, 124.5, 124.4, 116.1, 104.6, 51.7, 41.2, 35.0, 18.7. IR  $\nu_{\text{max}}$  (neat): 2988, 2233, 1641, 1414, 1290, 789, 624  $\text{cm}^{-1}$ . (*Trans* diastereomer)  $^1\text{H}$  NMR ( $\text{CDCl}_3$ , 400 MHz)  $\delta$ : 10.72 (s, 1H), 8.24 (d,  $J = 8.0$  Hz, 1H), 8.00 (d,  $J = 8.0$  Hz, 1H), 7.89 (t,  $J = 8.0$  Hz, 1H), 7.67 (td,  $J = 8.0, 1.2$  Hz, 1H), 7.63–7.57 (m, 1H), 7.48–7.43 (m, 1H), 7.24 (d,  $J = 6.8$  Hz, 1H), 5.34 (d,  $J = 3.2$  Hz, 1H), 4.05 (d,  $J = 3.2$  Hz, 1H), 3.41 (s, 3H), 2.47 (s, 3H).  $^{13}\text{C}\{^1\text{H}\}$  NMR ( $\text{DMSO-}d_6$ , 100 MHz)  $\delta$ : 166.6, 161.8, 148.9, 134.4, 133.0, 130.5, 129.5, 129.2, 127.5, 126.5, 125.9, 124.3, 123.5, 116.9, 104.6, 51.8, 38.5, 31.4, 18.5. HRMS (EI)  $m/z$ :  $[\text{M}^+]$  calcd for  $\text{C}_{19}\text{H}_{16}\text{N}_2\text{O}_3$ , 320.1161; found, 320.1163.

**5-Acetyl-4-(2-bromophenyl)-6-methyl-2-oxo-1,2,3,4-tetrahydropyridine-3-carbonitrile (5d).**

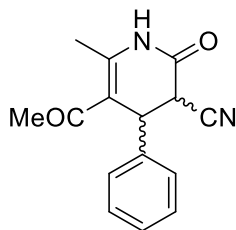

The title compound **5d** was synthesized by following general procedure A from enamine **1d** (58.0 mg, 0.5 mmol), (*E*)-3-(2-bromophenyl)-2-cyanoacrylic acid (**4a**, 92 mg, 0.55 mmol), boric acid (5 mol%) and purified by flash column chromatography (40% EtOAc in hexanes) to give a white solid (120 mg, 72% yield).  $R_f = 0.5$  (50% EtOAc/hexanes). (*Cis* diastereomer)  $^1\text{H}$  NMR (DMSO- $d_6$ , 400 MHz)  $\delta$ : 10.58 (s, 1H), 7.71 (d,  $J = 8.0$  Hz, 1H), 7.40 (t,  $J = 8.0$  Hz, 1H), 7.27 (t,  $J = 8.0$  Hz, 1H), 7.13 (d,  $J = 8.0$  Hz, 1H), 4.95 (d,  $J = 5.2$  Hz, 1H), 3.17 (d,  $J = 5.2$  Hz, 1H), 2.31 (s, 3H), 2.06 (s, 3H).  $^{13}\text{C}\{^1\text{H}\}$  NMR (DMSO- $d_6$ , 100 MHz)  $\delta$ : 196.4, 162.7, 147.5, 137.5, 133.8, 130.6, 129.3, 128.7, 125.2, 115.5, 114.8, 40.4, 40.2, 30.2, 19.2. IR  $\nu_{\text{max}}$  (neat): 3050, 2222, 1690, 1470, 1279, 778, 634  $\text{cm}^{-1}$ . (*Trans* diastereomer)  $^1\text{H}$  NMR (CDCl $_3$ , 400 MHz)  $\delta$ : 10.70 (s, 1H), 7.75 (d,  $J = 8.0$  Hz, 1H), 7.40 (t,  $J = 8.0$  Hz, 1H), 7.27 (t,  $J = 8.0$  Hz, 1H), 7.07 (d,  $J = 8.0$  Hz, 1H), 4.85 (d,  $J = 4.8$  Hz, 1H), 4.06 (d,  $J = 4.8$  Hz, 1H), 2.35 (s, 3H), 2.03 (s, 3H).  $^{13}\text{C}\{^1\text{H}\}$  NMR (DMSO- $d_6$ , 100 MHz)  $\delta$ : 196.9, 161.3, 146.8, 136.7, 134.1, 130.7, 129.1, 128.7, 124.5, 116.3, 113.7, 42.6, 38.7, 30.3, 18.9. HRMS (EI)  $m/z$ : [ $\text{M}^+$ ] calcd for C $_{15}$ H $_{13}$ BrN $_2$ O $_2$ , 332.0160; found, 332.0163.

**Methyl 5-cyano-2-methyl-6-oxo-4-(*p*-tolyl)-1,4,5,6-tetrahydropyridine-3-carboxylate (5e).**

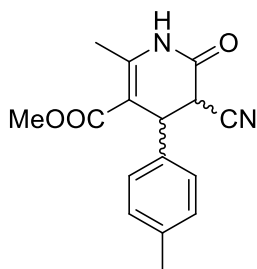

The title compound **5e** was synthesized by following general procedure A from enamine **1a** (58.0 mg, 0.5 mmol), (*E*)-2-cyano-3-(*p*-tolyl)acrylic acid (**4e**, 94 mg, 0.55 mmol), boric acid (5 mol%) and purified by flash column chromatography (40% EtOAc in hexanes) to give a white solid (111 mg, 83% yield).  $R_f = 0.6$  (50% EtOAc/hexanes). (*Cis* diastereomer)  $^1\text{H}$  NMR (DMSO- $d_6$ , 400 MHz)  $\delta$ : 10.51 (s, 1H), 7.14 (d,  $J = 8.0$  Hz, 2H), 7.06 (d,  $J = 8.0$  Hz, 2H), 4.89 (d,  $J = 6.8$  Hz, 1H), 4.31 (d,  $J = 6.8$  Hz, 1H), 3.55 (s, 3H), 2.33 (s, 3H), 2.28 (s, 3H).  $^{13}\text{C}\{^1\text{H}\}$  NMR (DMSO- $d_6$ , 100 MHz)  $\delta$ : 166.4, 163.5, 148.2, 137.6, 135.0, 129.7 (2C), 128.0 (2C), 116.2, 106.0,

51.8, 41.3, 40.8, 21.1, 18.5. IR  $\nu_{\text{max}}$  (neat): 3023, 2223, 1701, 1471, 1268, 775, 630  $\text{cm}^{-1}$ . (*Trans* diastereomer)  $^1\text{H}$  NMR ( $\text{CDCl}_3$ , 400 MHz)  $\delta$ : 10.62 (s, 1H), 7.12 (d,  $J = 8.0$  Hz, 2H), 7.06 (d,  $J = 8.0$  Hz, 2H), 4.45 (d,  $J = 3.2$  Hz, 1H), 4.08 (d,  $J = 3.2$  Hz, 1H), 3.56 (s, 3H), 2.38 (s, 3H), 2.26 (s, 3H).  $^{13}\text{C}\{^1\text{H}\}$  NMR ( $\text{DMSO}-d_6$ , 100 MHz)  $\delta$ : 166.7, 162.1, 154.8, 131.3, 130.4, 129.9 (2C), 127.3 (2C), 117.1, 104.4, 51.9, 41.7, 40.4, 21.0, 18.4. HRMS (EI)  $m/z$ :  $[\text{M}^+]$  calcd for  $\text{C}_{16}\text{H}_{16}\text{N}_2\text{O}_3$ , 284.1161; found, 284.1163.

**Methyl 5-cyano-4-(furan-2-yl)-2-methyl-6-oxo-1,4,5,6-tetrahydropyridine-3-carboxylate (5f).**

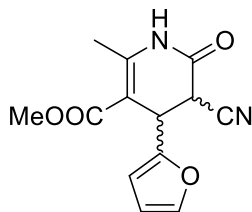

The title compound **5f** was synthesized by following general procedure A from enamine **1** (58.0 mg, 0.5 mmol), (*E*)-2-cyano-3-(furan-2-yl)acrylic acid (**4f**, 82 mg, 0.55 mmol), boric acid (5 mol%) and purified by flash column chromatography (50% EtOAc in hexanes) to give a white solid (97 mg, 79% yield).  $R_f = 0.5$  (60% EtOAc/hexanes). (*Cis* diastereomer)  $^1\text{H}$  NMR ( $\text{CDCl}_3$ , 400 MHz)  $\delta$ : 8.23 (s, 1H), 7.34 (s, 1H), 6.33–6.30 (m, 2H), 4.66 (d,  $J = 6.8$  Hz, 1H), 4.04 (d,  $J = 6.8$  Hz, 1H), 3.75 (s, 3H), 2.39 (s, 3H).  $^{13}\text{C}\{^1\text{H}\}$  NMR ( $\text{CDCl}_3$ , 100 MHz)  $\delta$ : 167.6, 164.6, 152.3, 149.6, 143.9, 116.0, 111.4, 108.9, 105.2, 52.0, 41.5, 36.9, 18.5. IR  $\nu_{\text{max}}$  (neat): 3020, 2260, 1710, 1571, 1368, 789, 633  $\text{cm}^{-1}$ . (*Trans* diastereomer)  $^1\text{H}$  NMR ( $\text{CDCl}_3$ , 400 MHz)  $\delta$ : 8.19 (s, 1H), 7.34 (s, 1H), 6.29–6.27 (m, 1H), 6.10 (d,  $J = 3.2$  Hz, 1H), 4.66 (d,  $J = 1.2$  Hz, 1H), 3.90 (d,  $J = 1.2$  Hz, 1H), 3.77 (s, 3H), 2.47 (s, 3H).  $^{13}\text{C}\{^1\text{H}\}$  NMR ( $\text{CDCl}_3$ , 100 MHz)  $\delta$ : 167.3, 165.3, 151.6, 149.4, 144.1, 115.8, 111.5, 109.6, 108.2, 52.2, 41.6, 37.9, 18.4. IR  $\nu_{\text{max}}$  (neat):  $\text{cm}^{-1}$ . HRMS (EI)  $m/z$ :  $[\text{M}^+]$  calcd for  $\text{C}_{13}\text{H}_{12}\text{N}_2\text{O}_4$ , 260.0797; found, 260.0795.

**Methyl 5-cyano-4-(3,4-dimethoxyphenyl)-2-methyl-6-oxo-1,4,5,6-tetrahydropyridine-3-carboxylate (5g).**

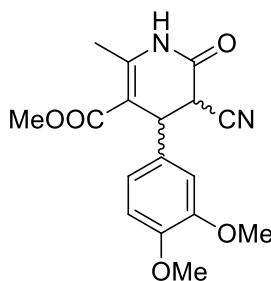

The title compound **5g** was synthesized by following general procedure A from enamine **1** (58.0 mg, 0.5 mmol), (*E*)-2-cyano-3-(3,4-dimethoxyphenyl)acrylic acid (**4g**, 117 mg, 0.55 mmol),

boric acid (5 mol%) and purified by flash column chromatography (30% EtOAc in hexanes) to give a white solid (107 mg, 68% yield).  $R_f = 0.5$  (40% EtOAc/hexanes). (*Cis* diastereomer)  $^1\text{H}$  NMR ( $\text{CDCl}_3$ , 400 MHz)  $\delta$ : 8.72 (s, 1H), 6.83 (d,  $J = 2.0$  Hz, 1H), 6.82 (d,  $J = 8.4$  Hz, 1H), 6.76 (dd,  $J = 8.4, 2.0$  Hz, 1H), 4.45 (d,  $J = 6.8$  Hz, 1H), 4.15 (d,  $J = 6.8$  Hz, 1H), 3.86 (s, 3H), 3.84 (s, 3H), 3.68 (s, 3H), 2.41 (s, 3H).  $^{13}\text{C}\{^1\text{H}\}$  NMR ( $\text{CDCl}_3$ , 100 MHz)  $\delta$ : 166.0, 163.4, 149.2, 149.0, 146.2, 127.9, 119.5, 114.5, 111.9, 111.5, 107.6, 56.0, 55.8, 51.9, 41.5, 41.0, 18.8. IR  $\nu_{\text{max}}$  (neat): 3033, 2262, 1716, 1572, 1368, 789, 633  $\text{cm}^{-1}$ . (*Trans* diastereomer)  $^1\text{H}$  NMR ( $\text{CDCl}_3$ , 400 MHz)  $\delta$ : 8.76 (s, 1H), 6.82 (s, 1H), 6.77 (d,  $J = 8.4$  Hz, 1H), 6.69 (dd,  $J = 8.4, 2.0$  Hz, 1H), 6.66 (d,  $J = 2.0$  Hz, 1H), 4.55 (d,  $J = 2.8$  Hz, 1H), 3.71 (d,  $J = 2.8$  Hz, 1H), 3.84 (s, 6H), 3.69 (s, 3H), 2.46 (s, 3H).  $^{13}\text{C}\{^1\text{H}\}$  NMR ( $\text{CDCl}_3$ , 100 MHz)  $\delta$ : 166.3, 162.3, 149.5, 148.9, 146.1, 129.6, 118.5, 115.4, 111.6, 110.3, 105.9, 56.0, 55.9, 51.9, 42.4, 40.0, 18.8. HRMS (EI)  $m/z$ :  $[\text{M}^+]$  calcd for  $\text{C}_{17}\text{H}_{18}\text{N}_2\text{O}_5$ , 330.1216; found, 330.1217.

**Methyl 5-cyano-4-(4-cyanophenyl)-2-methyl-6-oxo-1,4,5,6-tetrahydropyridine-3-carboxylate (5h).**

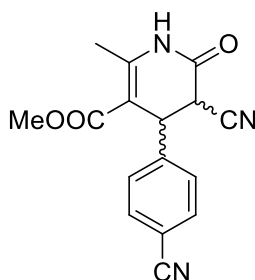

The title compound **5h** was synthesized by following general procedure A from enamine **1** (58.0 mg, 0.5 mmol), (*E*)-2-cyano-3-(4-cyanophenyl)acrylic acid (**4h**, 99 mg, 0.55 mmol), boric acid (5 mol%) and purified by flash column chromatography (40% EtOAc in hexanes) to give a white solid (128 mg, 92% yield).  $R_f = 0.5$  (50% EtOAc/hexanes). (*Cis* diastereomer)  $^1\text{H}$  NMR ( $\text{CDCl}_3$ , 400 MHz)  $\delta$ : 7.93 (bs, 1H), 7.66 (d,  $J = 8.0$  Hz, 2H), 7.38 (d,  $J = 8.0$  Hz, 2H), 4.45 (d,  $J = 7.2$  Hz, 1H), 4.18 (d,  $J = 7.2$  Hz, 1H), 3.68 (s, 3H), 2.48 (s, 3H).  $^{13}\text{C}\{^1\text{H}\}$  NMR ( $\text{CDCl}_3$ , 100 MHz)  $\delta$ : 165.5, 162.0, 147.0, 141.1, 132.9 (2C), 128.8 (2C), 118.3, 113.5, 112.7, 106.4, 52.1, 41.5, 40.7, 19.2. IR  $\nu_{\text{max}}$  (neat): 3115, 2227, 1727, 1671, 1386, 790, 623  $\text{cm}^{-1}$ . (*Trans* diastereomer)  $^1\text{H}$  NMR ( $\text{CDCl}_3$ , 400 MHz)  $\delta$ : 7.89 (bs, 1H), 7.64 (d,  $J = 8.0$  Hz, 2H), 7.29 (d,  $J = 8.0$  Hz, 2H), 4.63 (d,  $J = 2.8$  Hz, 1H), 3.67 (d,  $J = 2.8$  Hz, 1H), 3.68 (s, 3H), 2.53 (s, 3H).  $^{13}\text{C}\{^1\text{H}\}$  NMR ( $\text{CDCl}_3$ , 100 MHz)  $\delta$ : 165.7, 160.8, 146.9, 142.8, 133.2 (2C), 127.8 (2C), 118.1, 114.6, 112.5, 104.7, 42.8, 39.3, 31.0, 29.3. HRMS (EI)  $m/z$ :  $[\text{M}^+]$  calcd for  $\text{C}_{16}\text{H}_{13}\text{N}_3\text{O}_3$ , 295.0957; found, 295.0960.

**3-Ethyl 5-methyl 6-methyl-2-oxo-4-phenyl-1,2,3,4-tetrahydropyridine-3,5-dicarboxylate (5i).**

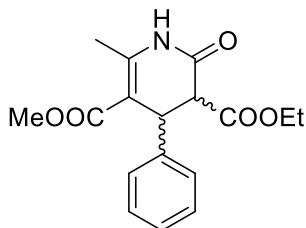

The title compound **5i** was synthesized by following general procedure A from enamine **1a** (58.0 mg, 0.5 mmol), (*Z*)-2-(ethoxycarbonyl)-3-phenylacrylic acid (**4i**, 121 mg, 0.55 mmol), boric acid (5 mol%) and purified by flash column chromatography (40% EtOAc in hexanes) to give a white solid (140 mg, 88% yield).  $R_f = 0.6$  (50% EtOAc/hexanes).  $^1\text{H}$  NMR ( $\text{CDCl}_3$ , 400 MHz)  $\delta$ : 8.78 (s, 1H), 7.32–7.29 (m, 2H), 7.26–7.24 (m, 1H), 7.22–7.20 (m, 2H), 4.69 (s, 1H), 4.25 (q,  $J = 7.2$  Hz, 2H), 3.65 (s, 3H), 3.60 (d,  $J = 1.6$  Hz, 1H), 2.41 (s, 3H), 1.28 (t,  $J = 7.2$  Hz, 3H).  $^{13}\text{C}\{^1\text{H}\}$  NMR ( $\text{CDCl}_3$ , 100 MHz)  $\delta$ : 168.0, 167.2, 166.9, 146.7, 139.8, 129.0, 127.4, 126.8, 105.6, 62.1, 54.8, 51.6, 42.0, 18.8, 14.1. IR  $\nu_{\text{max}}$  (neat): 2927, 1729, 1683, 1269, 1197, 1028, 702  $\text{cm}^{-1}$ . HRMS (EI)  $m/z$ :  $[\text{M}^+]$  calcd for  $\text{C}_{17}\text{H}_{19}\text{NO}_5$ , 317.1263; found, 317.1260.

**3-Ethyl 5-methyl 4-(4-methoxyphenyl)-6-methyl-2-oxo-1,2,3,4-tetrahydropyridine-3,5-dicarboxylate (5j).**

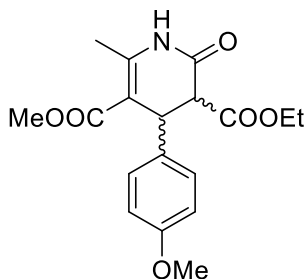

The title compound **5j** was synthesized by following general procedure A from enamine **1a** (58.0 mg, 0.5 mmol), (*Z*)-2-(ethoxycarbonyl)-3-(4-methoxyphenyl)acrylic acid (**4j**, 138 mg, 0.55 mmol), boric acid (5 mol%) and purified by flash column chromatography (40% EtOAc in hexanes) to give a white solid (142 mg, 82% yield).  $R_f = 0.5$  (50% EtOAc/hexanes).  $^1\text{H}$  NMR ( $\text{CDCl}_3$ , 400 MHz)  $\delta$ : 8.46 (s, 1H), 7.12 (d,  $J = 8.6$  Hz, 2H), 6.83 (d,  $J = 8.6$  Hz, 2H), 4.64 (s, 1H), 4.24 (q,  $J = 7.2$  Hz, 2H), 3.78 (s, 3H), 3.66 (s, 3H), 3.56 (d,  $J = 1.6$  Hz, 1H), 2.41 (s, 3H), 1.27 (t,  $J = 7.2$  Hz, 3H).  $^{13}\text{C}\{^1\text{H}\}$  NMR ( $\text{CDCl}_3$ , 100 MHz)  $\delta$ : 168.0, 167.1, 167.0, 158.8, 146.2, 131.7, 127.9, 114.3, 106.1, 62.1, 55.2, 55.0, 51.6, 41.2, 18.8, 14.1. IR  $\nu_{\text{max}}$  (neat): 2925, 1740, 1696, 1248, 1181, 1026, 841  $\text{cm}^{-1}$ . HRMS (EI)  $m/z$ :  $[\text{M}^+]$  calcd for  $\text{C}_{18}\text{H}_{21}\text{NO}_6$ , 347.1369; found, 347.1374.

**3-Ethyl 5-methyl 4-(4-isopropylphenyl)-6-methyl-2-oxo-1,2,3,4-tetrahydropyridine-3,5-dicarboxylate (5k).**

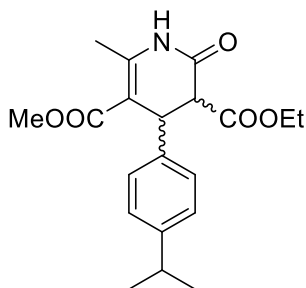

The title compound **5k** was synthesized by following general procedure A from enamine **1a** (58.0 mg, 0.5 mmol), (*Z*)-2-(ethoxycarbonyl)-3-(4-isopropylphenyl)acrylic acid (**4k**, 138 mg, 0.55 mmol), boric acid (5 mol%) and purified by flash column chromatography (40% EtOAc in hexanes) to give a white solid (131 mg, 73% yield).  $R_f = 0.6$  (50% EtOAc/hexanes).  $^1\text{H NMR}$  ( $\text{CDCl}_3$ , 400 MHz)  $\delta$ : 8.40 (s, 1H), 7.17–7.11 (m, 4H), 4.67 (s, 1H), 4.24 (q,  $J = 7.0$  Hz, 2H), 3.67 (s, 3H), 3.60 (d,  $J = 1.6$  Hz, 1H), 2.91–2.84 (m, 1H), 2.41 (s, 3H), 1.28 (t,  $J = 7.2$  Hz, 3H), 1.23 (d,  $J = 7.2$  Hz, 6H).  $^{13}\text{C}\{^1\text{H}\}$  NMR ( $\text{CDCl}_3$ , 100 MHz)  $\delta$ : 168.1, 167.1, 167.0, 147.9, 146.2, 137.0, 127.0, 126.7, 106.0, 62.1, 54.8, 51.6, 41.6, 33.7, 23.9, 18.9, 14.1. IR  $\nu_{\text{max}}$  (neat): 2957, 1737, 1702, 1198, 1089, 1021, 782  $\text{cm}^{-1}$ . HRMS (EI)  $m/z$ :  $[\text{M}^+]$  calcd for  $\text{C}_{20}\text{H}_{25}\text{NO}_5$ , 359.1733; found, 359.1731.

**3-Ethyl 5-methyl 4-(2-bromophenyl)-6-methyl-2-oxo-1,2,3,4-tetrahydropyridine-3,5-dicarboxylate (5l).**

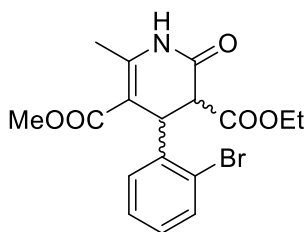

The title compound **5l** was synthesized by following general procedure A from enamine **1a** (58.0 mg, 0.5 mmol), (*Z*)-3-(2-bromophenyl)-2-(ethoxycarbonyl)acrylic acid (**4l**, 165 mg, 0.55 mmol), boric acid (5 mol%) and purified by flash column chromatography (40% EtOAc in hexanes) to give a white solid (168 mg, 85% yield).  $R_f = 0.5$  (50% EtOAc/hexanes).  $^1\text{H NMR}$  ( $\text{CDCl}_3$ , 400 MHz)  $\delta$ : 7.83 (s, 1H), 7.62 (dd,  $J = 8.0, 1.2$  Hz, 1H), 7.23–7.21 (m, 1H), 7.16–7.11 (m, 1H), 7.03 (dd,  $J = 7.8, 1.4$  Hz), 5.13 (s, 1H), 4.28 (q,  $J = 7.2$  Hz, 2H), 3.68 (s, 1H), 3.65 (s, 3H), 2.49 (s, 3H), 1.31 (t,  $J = 7.2$  Hz, 3H).  $^{13}\text{C}\{^1\text{H}\}$  NMR ( $\text{CDCl}_3$ , 100 MHz)  $\delta$ : 167.5, 166.6, 166.3, 147.5, 137.5, 133.9, 129.2, 127.9, 127.6, 124.2, 105.0, 62.2, 52.7, 51.7, 41.5, 18.9, 14.1. IR  $\nu_{\text{max}}$  (neat): 2924, 1737, 1708, 1278, 1200, 1092, 760  $\text{cm}^{-1}$ . HRMS (EI)  $m/z$ :  $[\text{M}^+]$  calcd for  $\text{C}_{17}\text{H}_{18}\text{BrNO}_5$ , 395.0368; found, 395.0364.



**3-Ethyl 5-methyl 6-methyl-4-(4-nitrophenyl)-2-oxo-1,2,3,4-tetrahydropyridine-3,5-dicarboxylate (5m).**

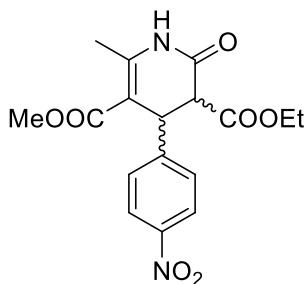

The title compound **5m** was synthesized by following general procedure A from enamine **1a** (58.0 mg, 0.5 mmol), (*Z*)-2-(ethoxycarbonyl)-3-(4-nitrophenyl)acrylic acid (**4m**, 146 mg, 0.55 mmol), boric acid (5 mol%) and purified by flash column chromatography (50% EtOAc in hexanes) to give a pale yellow solid (147 mg, 81% yield).  $R_f = 0.4$  (50% EtOAc/hexanes).  $^1\text{H}$  NMR ( $\text{CDCl}_3$ , 400 MHz)  $\delta$ : 8.81 (s, 1H), 8.15 (d,  $J = 8.8$  Hz, 2H), 7.38 (d,  $J = 8.8$  Hz, 2H), 4.77 (s, 1H), 4.25 (q,  $J = 7.2$  Hz, 2H), 3.65 (s, 3H), 3.56 (d,  $J = 1.6$  Hz, 1H), 2.42 (s, 3H), 1.27 (t,  $J = 7.2$  Hz, 3H).  $^{13}\text{C}\{^1\text{H}\}$  NMR ( $\text{CDCl}_3$ , 100 MHz)  $\delta$ : 167.4, 166.5, 147.5, 147.4, 147.3, 128.0, 124.3, 104.6, 62.6, 54.1, 51.8, 41.8, 18.9, 14.0. IR  $\nu_{\text{max}}$  (neat): 2927, 1735, 1691, 1348, 1182, 1091, 856  $\text{cm}^{-1}$ . HRMS (EI)  $m/z$ :  $[\text{M}^+]$  calcd for  $\text{C}_{17}\text{H}_{18}\text{N}_2\text{O}_7$ , 362.1114; found, 362.1119.

**3-Ethyl 5-methyl 4-(furan-2-yl)-6-methyl-2-oxo-1,2,3,4-tetrahydropyridine-3,5-dicarboxylate (5n).**

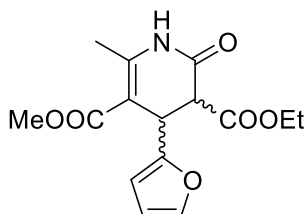

The title compound **5n** was synthesized by following general procedure A from enamine **1a** (58.0 mg, 0.5 mmol), (*Z*)-2-(ethoxycarbonyl)-3-(furan-2-yl)acrylic acid (**4n**, 116 mg, 0.55 mmol), boric acid (5 mol%) and purified by flash column chromatography (40% EtOAc in hexanes) to give a white solid (106 mg, 69% yield).  $R_f = 0.5$  (50% EtOAc/hexanes). (*Major* diastereomer)  $^1\text{H}$  NMR ( $\text{CDCl}_3$ , 400 MHz)  $\delta$ : 8.47 (s, 1H), 7.31 (d,  $J = 1.6$  Hz, 1H), 6.25 (dd,  $J = 2.8, 1.6$  Hz, 1H), 6.05 (d,  $J = 2.8$  Hz, 1H), 4.77 (s, 1H), 4.23 (q,  $J = 7.2$  Hz, 2H), 3.78 (d,  $J = 1.2$  Hz, 1H), 3.73 (s, 3H), 2.37 (s, 3H), 1.25 (t,  $J = 7.2$  Hz, 3H).  $^{13}\text{C}\{^1\text{H}\}$  NMR ( $\text{CDCl}_3$ , 100 MHz)  $\delta$ : 167.4, 166.8, 166.6, 152.5, 147.2, 142.4, 110.3, 106.1, 103.6, 62.2, 51.6, 51.4, 36.0, 18.9, 14.0. IR  $\nu_{\text{max}}$  (neat): 2952, 1737, 1702, 1279, 1183, 1090, 734  $\text{cm}^{-1}$ . (*Minor* diastereomer)  $^1\text{H}$  NMR ( $\text{CDCl}_3$ , 400 MHz)  $\delta$ : 7.22 (d,  $J = 1.2$  Hz, 1H), 6.21 (dd,  $J = 3.2, 1.2$  Hz, 1H), 6.10 (s, 1H), 5.93 (d,  $J = 3.2$  Hz, 1H), 5.20 (s, 1H), 4.23 (q,  $J = 7.2$  Hz, 2H), 3.72 (s, 1H), 3.71 (s, 3H), 2.33 (s, 3H), 1.26 (t,  $J = 7.2$  Hz, 3H).  $^{13}\text{C}\{^1\text{H}\}$  NMR ( $\text{CDCl}_3$ , 100 MHz)  $\delta$ : 167.9, 167.4, 166.8, 158.5, 145.7, 141.0,

110.0, 104.3, 100.4, 60.4, 51.4, 51.1, 33.2, 19.4, 14.2. HRMS (EI)  $m/z$ :  $[M^+]$  calcd for  $C_{15}H_{17}NO_6$ , 307.1056; found, 307.1054.

**3-Ethyl 5-methyl 6-methyl-2-oxo-4-(thiophen-2-yl)-1,2,3,4-tetrahydropyridine-3,5-dicarboxylate (5o).**

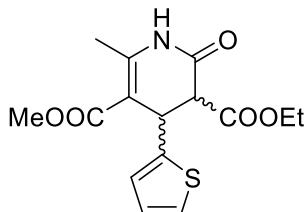

The title compound **5o** was synthesized by following general procedure A from enamine **1a** (58.0 mg, 0.5 mmol), (*Z*)-2-(ethoxycarbonyl)-3-(thiophen-2-yl)acrylic acid (**4o**, 124 mg, 0.55 mmol), boric acid (5 mol%) and purified by flash column chromatography (40% EtOAc in hexanes) to give a white solid (126 mg, 78% yield).  $R_f = 0.5$  (50% EtOAc/hexanes). (*Major* diastereomer)  $^1H$  NMR ( $CDCl_3$ , 400 MHz)  $\delta$ : 8.66 (s, 1H), 7.15 (dd,  $J = 5.0, 1.0$  Hz, 1H), 6.91–6.89 (m, 1H), 6.87–6.85 (m, 1H), 4.94 (s, 1H), 4.23 (q,  $J = 7.2$  Hz, 2H), 3.74 (s, 4H), 2.37 (s, 3H), 1.25 (t,  $J = 7.2$  Hz, 3H).  $^{13}C\{^1H\}$  NMR ( $CDCl_3$ , 100 MHz)  $\delta$ : 167.3, 167.0, 166.6, 146.8, 143.3, 126.9, 124.5, 124.3, 106.5, 62.3, 54.5, 51.6, 37.3, 18.8, 14.0. IR  $\nu_{max}$  (neat): 2950, 1737, 1698, 1434, 1183, 1094, 716  $cm^{-1}$ . (*Minor* diastereomer)  $^1H$  NMR ( $CDCl_3$ , 400 MHz)  $\delta$ : 7.05 (dd,  $J = 5.0, 1.0$  Hz, 1H), 6.87–6.85 (m, 1H), 6.78 (d,  $J = 3.6$  Hz, 1H), 6.29 (s, 1H), 5.34 (s, 1H), 4.13 (q,  $J = 7.0$  Hz, 2H), 3.721 (s, 1H), 3.720 (s, 3H), 2.33 (s, 3H), 1.26 (t,  $J = 7.0$  Hz, 3H).  $^{13}C\{^1H\}$  NMR ( $CDCl_3$ , 100 MHz)  $\delta$ : 167.8, 167.3, 167.0, 151.5, 145.2, 126.5, 123.2, 122.9, 103.1, 62.3, 54.5, 51.1, 34.3, 19.3, 14.0. HRMS (EI)  $m/z$ :  $[M^+]$  calcd for  $C_{15}H_{17}NO_5S$ , 323.0827; found, 323.0829.

**Methyl 2-methyl-6-oxo-4-phenyl-1,4,5,6-tetrahydropyridine-3-carboxylate (3).**

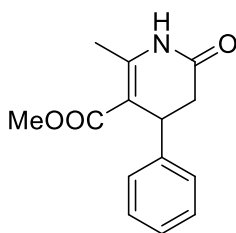

To a stirred solution of commercially available enamine **1a** (58.0 mg, 0.5 mmol) and (*Z*)-2-(ethoxycarbonyl)-3-phenylacrylic acid (**4i**, 121 mg, 0.55 mmol) in dry toluene (5 mL) was added boric acid (5 mol%) at room temperature. The resulting mixture was refluxed for overnight. After completion of the reaction, the solution was evaporated and the residue was diluted with ethyl acetate (100 mL), washed with water (30 mL) and brine (30 mL). The organic layer was then dried over anhydrous  $MgSO_4$  and concentrated under reduced pressure to provide the crude product which was further purified by column chromatography (40% EtOAc in hexanes) to obtain the desired compound **3** as a white solid (102 mg, 83% yield).  $R_f = 0.5$  (50%

EtOAc/hexanes). mp 191–193 °C (Lit.<sup>1</sup> 191–193 °C). <sup>1</sup>H NMR (CDCl<sub>3</sub>, 400 MHz)  $\delta$ : 8.46 (s, 1H), 7.31–7.28 (m, 2H), 7.25–7.18 (m, 3H), 4.27 (d,  $J$  = 7.6 Hz, 1H), 3.67 (s, 3H), 2.95 (ABdq,  $J$  = 16.4, 8.4, Hz, 1H), 2.72 (d,  $J$  = 15.6 Hz, 1H), 2.42 (s, 3H).

Procedure for preparation of *Cis* diastereomer of compound **5a**.

To a stirred solution of commercially available enamine **1a** (58.0 mg, 0.5 mmol) and (*E*)-2-cyano-3-phenylacrylic acid (**4a**, 87 mg, 0.5 mmol) in dry toluene (5 mL) was added (+)-camphorsulfonic acid (5 mol%) at room temperature. The resulting mixture was refluxed for 3 h. After completion of the reaction, the solution was evaporated and the residue was diluted with ethyl acetate (100 mL), washed with water (30 mL) and brine (30 mL). The organic layer was then dried over anhydrous MgSO<sub>4</sub> and concentrated under reduced pressure to provide the crude product which was further purified by column chromatography (40% EtOAc in hexanes) to obtain the desired *Cis* diastereomer of compound **5a**.

**(4*S*,5*R*)-Methyl 5-cyano-2-methyl-6-oxo-4-phenyl-1,4,5,6-tetrahydropyridine-3-carboxylate (5a).**

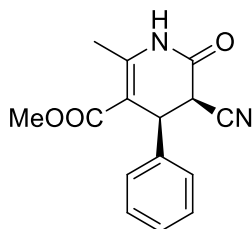

White solid (116 mg, 86% yield).  $R_f$  = 0.5 (50% EtOAc/hexanes). <sup>1</sup>H NMR (DMSO-*d*<sub>6</sub>, 400 MHz)  $\delta$ : 10.54 (s, 1H), 7.37–7.30 (m, 3H), 7.20–7.18 (m, 2H), 4.93 (d,  $J$  = 6.8 Hz, 1H), 4.34 (d,  $J$  = 6.8 Hz, 1H), 3.56 (s, 3H), 2.34 (s, 3H). <sup>13</sup>C{<sup>1</sup>H} NMR (DMSO-*d*<sub>6</sub>, 100 MHz)  $\delta$ : 166.4, 163.5, 148.4, 138.0, 129.2 (2C), 128.4, 128.1 (2C), 116.2, 105.8, 51.8, 41.2, 41.1, 18.6. IR  $\nu_{\text{max}}$  (neat): 3133, 2228, 1630, 1415, 1280, 790, 636 cm<sup>-1</sup>. HRMS (EI)  $m/z$ : [ $M^+$ ] calcd for C<sub>15</sub>H<sub>14</sub>N<sub>2</sub>O<sub>3</sub>, 270.1004; found, 270.1006.

General procedure B for preparation of compounds **8a–e**.

To a stirred solution of commercially available enamine **6** (0.5 mmol) and carboxylic acid **7** (0.5 mmol) in dry toluene (5 mL) was added boric acid (5 mol%) at room temperature. The resulting mixture was refluxed for 3 h in an oil bath. After completion of the reaction, the solution was evaporated and the residue was diluted with ethyl acetate (100 mL), washed with water (30 mL) and brine (30 mL). The organic layer was then dried over anhydrous MgSO<sub>4</sub> and concentrated under reduced pressure to provide the crude product which was further purified by column chromatography to obtain the desired compound.

#### 4-(2-Hydroxyphenyl)-3,4-dihydro-1H-chromeno[4,3-b]pyridine-2,5-dione (**8a**).

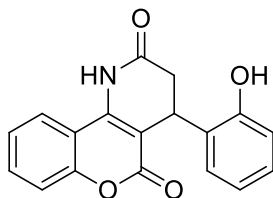

The title compound **8a** was synthesized by following general procedure B from enamine **6a** (81 mg, 0.5 mmol), 2-oxo-2*H*-chromene-3-carboxylic acid (**7a**, 95 mg, 0.5 mmol), boric acid (5 mol%) and purified by flash column chromatography (60% EtOAc in hexanes) to give a white solid (126 mg, 82% yield).  $R_f = 0.4$  (60% EtOAc/hexanes). mp 234–236 °C.  $^1\text{H}$  NMR ( $\text{CD}_3\text{OD}$ , 400 MHz)  $\delta$ : 8.06 (dd,  $J = 8.4, 1.2$  Hz, 1H), 7.71 (td,  $J = 8.4, 1.2$  Hz, 1H), 7.48–7.45 (m, 2H), 7.07 (td,  $J = 8.4, 1.2$  Hz, 1H), 6.85–6.82 (m, 2H), 6.70 (t,  $J = 7.2$  Hz, 1H), 4.76 (dd,  $J = 8.4, 1.2$  Hz, 1H), 3.14 (dd,  $J = 16.4, 8.4$  Hz, 1H), 2.90 (dd,  $J = 16.4, 1.2$  Hz, 1H).  $^{13}\text{C}\{^1\text{H}\}$  NMR ( $\text{CD}_3\text{OD}$ , 100 MHz)  $\delta$ : 171.0, 160.5, 155.3, 153.3, 146.8, 132.8, 128.5, 126.8, 126.7, 124.7, 123.5, 119.4, 117.3, 115.9, 113.6, 103.1, 36.8, 31.1. IR  $\nu_{\text{max}}$  (neat): 3254, 2928, 1741, 1646, 1237, 1036, 947, 759  $\text{cm}^{-1}$ . HRMS (EI)  $m/z$ :  $[\text{M}^+]$  calcd for  $\text{C}_{18}\text{H}_{13}\text{NO}_4$ , 307.0845; found, 307.0843.

#### 4-(5-Bromo-2-hydroxyphenyl)-3,4-dihydro-1H-chromeno[4,3-b]pyridine-2,5-dione (**8b**).

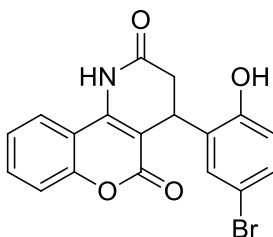

The title compound **8b** was synthesized by following general procedure A from enamine **6a** (81.0 mg, 0.5 mmol), 6-bromo-2-oxo-2*H*-chromene-3-carboxylic acid (**7b**, 92 mg, 0.55 mmol), boric acid (5 mol%) and purified by flash column chromatography (50% EtOAc in hexanes) to give a white solid (176 mg, 91% yield).  $R_f = 0.4$  (50% EtOAc/hexanes). mp 228–230 °C.  $^1\text{H}$  NMR ( $\text{DMSO-}d_6$ , 400 MHz)  $\delta$ : 10.99 (s, 1H), 10.18 (s, 1H), 8.25 (dd,  $J = 8.0, 1.2$  Hz, 1H), 7.71 (td,  $J = 8.0, 1.2$  Hz, 1H), 7.48 (dd,  $J = 8.0, 0.4$  Hz, 1H), 7.44 (t,  $J = 8.4$  Hz, 1H), 7.25 (dd,  $J = 8.0, 2.0$  Hz, 1H), 6.85–6.83 (m, 2H), 4.52 (d,  $J = 8.4$  Hz, 1H), 3.17 (dd,  $J = 16.4, 8.4$  Hz, 1H), 2.58 (d,  $J = 16.4$  Hz, 1H).  $^{13}\text{C}\{^1\text{H}\}$  NMR ( $\text{DMSO-}d_6$ , 100 MHz)  $\delta$ : 170.8, 160.5, 154.8, 153.3, 147.0, 133.0, 131.3, 129.8, 129.4, 124.7, 123.6, 118.1, 117.4, 113.5, 110.5, 102.4, 36.6, 31.3. IR  $\nu_{\text{max}}$  (neat): 3244, 2930, 1747, 1655, 1238, 1040, 943, 755  $\text{cm}^{-1}$ . HRMS (EI)  $m/z$ :  $[\text{M}^+]$  calcd for  $\text{C}_{18}\text{H}_{12}\text{BrNO}_4$ , 384.9950; found, 384.9953.

**1-Ethyl-4-(2-hydroxyphenyl)-7,7-dimethyl-3,4,7,8-tetrahydroquinoline-2,5(1*H*,6*H*)-dione (8c).**

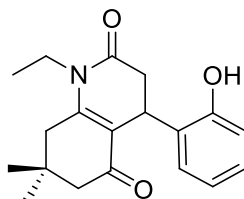

The title compound **8c** was synthesized by following general procedure B from enamine **6b** (84.0 mg, 0.5 mmol), 2-oxo-2*H*-chromene-3-carboxylic acid (**7a**, 95 mg, 0.5 mmol), boric acid (5 mol%) and purified by flash column chromatography (40% EtOAc in hexanes) to give a white solid (144 mg, 92% yield).  $R_f = 0.5$  (50% EtOAc/hexanes). mp 238–240 °C.  $^1\text{H}$  NMR (DMSO- $d_6$ , 400 MHz)  $\delta$ : 9.57 (s, 1H), 7.00 (t,  $J = 7.6$  Hz, 1H), 6.81 (d,  $J = 7.6$  Hz, 1H), 6.67 (d,  $J = 7.6$  Hz, 1H), 6.10 (t,  $J = 7.6$  Hz, 1H), 4.36 (d,  $J = 7.2$  Hz, 1H), 3.90–3.81 (m, 1H), 3.62–3.54 (m, 1H), 2.88, 2.55 (ABq,  $J = 15.2$  Hz, 1H each), 2.79 (dd,  $J = 15.2, 8.0$  Hz, 1H), 2.60 (d,  $J = 15.2$  Hz, 1H), 2.32, 2.17 (ABq,  $J = 15.2$  Hz, 1H each), 1.14 (s, 3H), 1.10 (s, 3H), 1.07 (t,  $J = 7.2$  Hz, 3H).  $^{13}\text{C}\{^1\text{H}\}$  NMR (DMSO- $d_6$ , 100 MHz)  $\delta$ : 195.3, 169.7, 155.3, 155.1, 128.0, 127.0, 126.6, 119.0, 115.9, 115.8, 49.9, 39.3, 37.3, 36.6, 33.0, 29.3, 27.8, 27.7, 14.9. IR  $\nu_{\text{max}}$  (neat): 3248, 2927, 1733, 1635, 1236, 803, 738, 699  $\text{cm}^{-1}$ . HRMS (EI)  $m/z$ :  $[\text{M}^+]$  calcd for  $\text{C}_{19}\text{H}_{23}\text{NO}_3$ , 313.1678; found, 313.1675.

**4-(5-Bromo-2-hydroxyphenyl)-1-ethyl-7,7-dimethyl-3,4,7,8-tetrahydroquinoline-2,5(1*H*,6*H*)-dione (8d).**

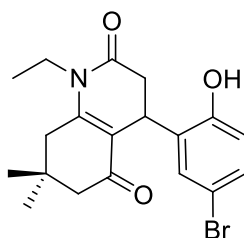

The title compound **8d** was synthesized by following general procedure B from enamine **6b** (84.0 mg, 0.5 mmol), 6-bromo-2-oxo-2*H*-chromene-3-carboxylic acid (**7b**, 135 mg, 0.5 mmol), boric acid (5 mol%) and purified by flash column chromatography (40% EtOAc in hexanes) to give a white solid (189 mg, 96% yield).  $R_f = 0.5$  (50% EtOAc/hexanes). mp 232–234 °C.  $^1\text{H}$  NMR ( $\text{CDCl}_3$ , 400 MHz)  $\delta$ : 9.20 (s, 1H), 7.16 (dd,  $J = 8.8, 2.4$  Hz, 1H), 6.98 (d,  $J = 2.4$  Hz, 1H), 6.72 (d,  $J = 8.8$  Hz, 1H), 4.32 (dd,  $J = 6.8, 2.0$  Hz, 1H), 4.13–4.04 (m, 1H), 3.76–3.67 (m, 1H), 2.96–2.85 (m, 2H), 2.60, 2.47 (ABq,  $J = 17.2$  Hz, 1H each), 2.34, 2.33 (ABq,  $J = 17.2$  Hz, 1H each), 1.24 (t,  $J = 7.2$  Hz, 3H), 1.14 (s, 3H), 1.07 (s, 3H).  $^{13}\text{C}\{^1\text{H}\}$  NMR (DMSO- $d_6$ , 100 MHz)  $\delta$ : 195.3, 169.4, 155.4, 154.7, 130.7, 129.7, 129.3, 117.9, 115.7, 110.3, 49.7, 39.3, 37.0, 36.4,

33.0, 28.8, 27.94, 27.90, 14.9. IR  $\nu_{\text{max}}$  (neat): 3250, 2930, 1735, 1638, 1237, 803, 740, 691  $\text{cm}^{-1}$ . HRMS (EI)  $m/z$ :  $[M^+]$  calcd for  $\text{C}_{19}\text{H}_{22}\text{BrNO}_3$ , 391.0783; found, 391.0785.

#### 4-(2-Hydroxy-4-methoxyphenyl)-3,4,7,8-tetrahydroquinoline-2,5(1*H*,6*H*)-dione (**8e**).

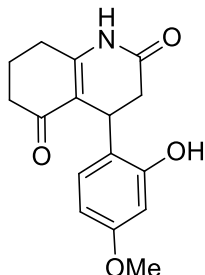

The title compound **8e** was synthesized by following general procedure B from enamine **6c** (56.0 mg, 0.5 mmol), 7-methoxy-2-oxo-2*H*-chromene-3-carboxylic acid (**7c**, 110 mg, 0.55 mmol), boric acid (5 mol%) and purified by flash column chromatography (60% EtOAc in hexanes) to give a white solid (105 mg, 73% yield).  $R_f = 0.3$  (50% EtOAc/hexanes). mp 226–228 °C.  $^1\text{H}$  NMR ( $\text{DMSO-}d_6$ , 400 MHz)  $\delta$ : 10.02 (s, 1H), 9.59 (s, 1H), 6.61 (d,  $J = 8.4$  Hz, 1H), 6.39 (d,  $J = 2.4$  Hz, 1H), 6.23 (dd,  $J = 8.4, 2.4$  Hz, 1H), 4.26 (d,  $J = 8.0$  Hz, 1H), 3.64 (s, 3H), 2.73 (dd,  $J = 16.4, 8.0$  Hz, 1H), 2.58–2.54 (m, 2H), 2.43 (d,  $J = 16.4$  Hz, 1H), 2.29 (t,  $J = 6.0$  Hz, 2H), 2.04–1.95 (m, 2H).  $^{13}\text{C}\{^1\text{H}\}$  NMR ( $\text{DMSO-}d_6$ , 100 MHz)  $\delta$ : 195.2, 171.0, 159.4, 156.0, 156.9, 127.1, 120.3, 113.1, 104.2, 102.1, 55.3, 37.5, 37.0, 28.0, 27.0, 21.6. IR  $\nu_{\text{max}}$  (neat): 3246, 2956, 1716, 1623, 1236, 819, 753, 684  $\text{cm}^{-1}$ . HRMS (EI)  $m/z$ :  $[M^+]$  calcd for  $\text{C}_{16}\text{H}_{17}\text{NO}_4$ , 287.1158; found, 287.1155.

General procedure C for preparation of compounds **9a–e**.

To a stirred solution of commercially available enamine **1** (0.5 mmol) and carboxylic acid **7** (0.5 mmol) in dry toluene (5 mL) was added boric acid (5 mol%) at room temperature. The resulting mixture stirred at 90 °C for 10 h in an oil bath. After completion of the reaction, the solution was evaporated and the residue was diluted with ethyl acetate (100 mL), washed with water (30 mL) and brine (30 mL). The organic layer was then dried over anhydrous  $\text{MgSO}_4$  and concentrated under reduced pressure to provide the crude product which was further purified by column chromatography to obtain the desired compound.

#### (*Z*)-Methyl 2-(4-(2-hydroxyphenyl)-6-oxopiperidin-2-ylidene)acetate (**9a**).

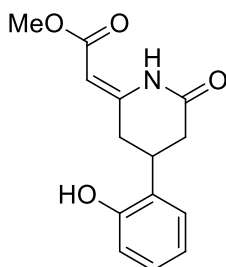

The title compound **9a** was synthesized by following general procedure C from enamine **1** (58.0 mg, 0.5 mmol), 2-oxo-2*H*-chromene-3-carboxylic acid (**7a**, 92 mg, 0.5 mmol), boric acid (5 mol%) and purified by flash column chromatography (40% EtOAc in hexanes) to give a white solid (96 mg, 73% yield).  $R_f = 0.4$  (30% EtOAc/hexanes). mp 188–190 °C.  $^1\text{H}$  NMR (DMSO- $d_6$ , 400 MHz)  $\delta$ : 10.53 (s, 1H), 9.61 (s, 1H), 7.12 (dd,  $J = 7.6, 1.2$  Hz, 1H), 7.08 (td,  $J = 7.6, 1.2$  Hz, 1H), 6.83 (dd,  $J = 7.6, 1.2$  Hz, 1H), 6.78 (td,  $J = 7.6, 1.2$  Hz, 1H), 5.05 (s, 1H), 3.65 (s, 3H), 3.52–3.45 (m, 1H), 2.90–2.84 (m, 1H), 2.84–2.77 (m, 1H), 2.76–2.70 (m, 1H), 2.68–2.62 (m, 1H).  $^{13}\text{C}\{^1\text{H}\}$  NMR (DMSO- $d_6$ , 100 MHz)  $\delta$ : 170.5, 169.0, 155.6, 155.2, 128.3, 128.2, 127.0, 119.7, 115.7, 91.3, 51.4, 37.5, 33.6, 30.5. IR  $\nu_{\text{max}}$  (neat): 3243, 2931, 1715, 1635, 1295, 1190, 1036, 863, 738  $\text{cm}^{-1}$ . HRMS (EI)  $m/z$ : [ $\text{M}^+$ ] calcd for  $\text{C}_{14}\text{H}_{15}\text{NO}_4$ , 261.1001; found, 261.1005.

**(Z)-Methyl 2-(4-(2-hydroxy-4-methoxyphenyl)-6-oxopiperidin-2-ylidene)acetate (9b).**

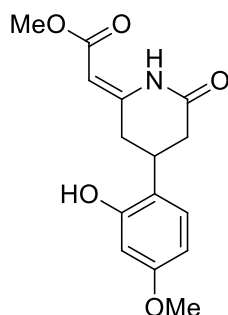

The title compound **9b** was synthesized by following general procedure C from enamine **1** (58.0 mg, 0.5 mmol), 7-methoxy-2-oxo-2*H*-chromene-3-carboxylic acid (**7c**, 110 mg, 0.5 mmol), boric acid (5 mol%) and purified by flash column chromatography (35% EtOAc in hexanes) to give a white solid (99 mg, 68% yield).  $R_f = 0.5$  (40% EtOAc/hexanes). mp 188–190 °C.  $^1\text{H}$  NMR ( $\text{CDCl}_3$ , 400 MHz)  $\delta$ : 10.8 (s, 1H), 6.96 (d,  $J = 8.4$  Hz, 1H), 6.61 (bs, 1H), 6.43 (dd,  $J = 8.4, 2.4$  Hz, 1H), 6.36 (d,  $J = 2.4$  Hz, 1H), 4.94 (s, 1H), 3.76 (s, 3H), 3.71 (s, 3H), 3.52–3.44 (m, 1H), 2.93–2.82 (m, 2H), 2.77–2.67 (m, 2H).  $^{13}\text{C}\{^1\text{H}\}$  NMR ( $\text{CDCl}_3$ , 100 MHz)  $\delta$ : 169.5, 168.5, 160.1, 159.7, 154.9, 153.6, 151.4, 129.5, 127.3, 92.6, 55.4, 55.3, 52.4, 51.1, 44.2. IR  $\nu_{\text{max}}$  (neat): 3248, 2930, 1720, 1645, 1291, 1188, 1033, 863, 736  $\text{cm}^{-1}$ . HRMS (EI)  $m/z$ : [ $\text{M}^+$ ] calcd for  $\text{C}_{15}\text{H}_{17}\text{NO}_5$ , 353.0263; found, 353.0266.

**(Z)-Methyl 2-(4-(5-bromo-2-hydroxyphenyl)-6-oxopiperidin-2-ylidene)acetate (9c).**

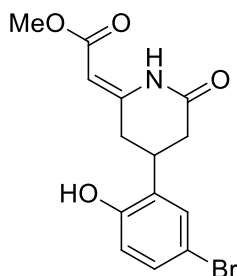

The title compound **9c** was synthesized by following general procedure C from enamine **1** (58.0 mg, 0.5 mmol), 6-bromo-2-oxo-2*H*-chromene-3-carboxylic acid (**7b**, 135 mg, 0.55 mmol), boric acid (5 mol%) and purified by flash column chromatography (30% EtOAc in hexanes) to give a white solid (150 mg, 88% yield).  $R_f = 0.5$  (50% EtOAc/hexanes). mp 184–186 °C.  $^1\text{H}$  NMR ( $\text{CD}_3\text{OD}$ , 400 MHz)  $\delta$ : 7.26 (d,  $J = 2.0$  Hz, 1H), 7.22 (dd,  $J = 8.4, 2.0$  Hz, 1H), 6.74 (d,  $J = 8.4$  Hz, 1H), 5.05 (s, 1H), 3.71 (s, 3H), 3.57–3.50 (m, 1H), 2.99–2.91 (m, 1H), 2.98–2.91 (m, 1H), 2.79–2.75 (m, 2H).  $^{13}\text{C}\{^1\text{H}\}$  NMR ( $\text{CD}_3\text{OD}$ , 100 MHz)  $\delta$ : 171.6, 168.8, 154.3, 153.7, 130.5, 130.2, 129.3, 116.7, 111.0, 92.1, 50.2, 36.5, 32.9, 31.2. IR  $\nu_{\text{max}}$  (neat): 3245, 2948, 1706, 1636, 1361, 1091, 734, 700  $\text{cm}^{-1}$ . HRMS (EI)  $m/z$ :  $[\text{M}^+]$  calcd for  $\text{C}_{14}\text{H}_{14}\text{BrNO}_4$ , 339.0106; found, 339.0106.

**(E)-Methyl 2-(4-(2-hydroxyphenyl)-1-methyl-6-oxopiperidin-2-ylidene)acetate (9d).**

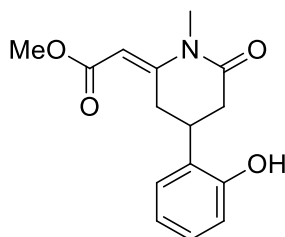

The title compound **9d** was synthesized by following general procedure C from enamine **1b** (65.0 mg, 0.5 mmol), 2-oxo-2*H*-chromene-3-carboxylic acid (**7a**, 95 mg, 0.5 mmol), boric acid (5 mol%) and purified by flash column chromatography (40% EtOAc in hexanes) to give a white solid (105 mg, 76% yield).  $R_f = 0.5$  (50% EtOAc/hexanes). mp 178–180 °C.  $^1\text{H}$  NMR ( $\text{DMSO-}d_6$ , 400 MHz)  $\delta$ : 9.59 (s, 1H), 7.12–7.06 (m, 2H), 6.84–6.79 (m, 2H), 5.34 (s, 1H), 3.89 (d,  $J = 16.4$  Hz, 1H), 3.58 (s, 3H), 3.41–3.36 (m, 1H), 3.14 (s, 3H), 2.86 (t,  $J = 16.4$  Hz, 2H), 2.70 (d,  $J = 16.4$  Hz, 1H).  $^{13}\text{C}\{^1\text{H}\}$  NMR ( $\text{DMSO-}d_6$ , 100 MHz)  $\delta$ : 170.6, 167.5, 157.2, 155.2, 128.8, 128.1, 126.9, 119.7, 115.6, 95.9, 51.1, 38.3, 31.5, 30.0, 29.7. IR  $\nu_{\text{max}}$  (neat): 2928, 1719, 1680, 1547, 1455, 1261, 801, 740  $\text{cm}^{-1}$ . HRMS (EI)  $m/z$ :  $[\text{M}^+]$  calcd for  $\text{C}_{15}\text{H}_{17}\text{NO}_4$ , 275.1158; found, 275.1155.

**(E)-Methyl 2-(4-(5-bromo-2-hydroxyphenyl)-1-methyl-6-oxopiperidin-2-ylidene)acetate (9e).**

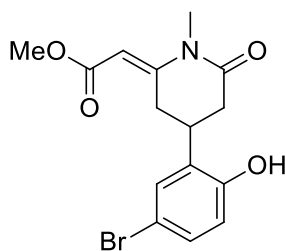

The title compound **9e** was synthesized by following general procedure C from enamine **1** (65.0 mg, 0.5 mmol), 6-bromo-2-oxo-2*H*-chromene-3-carboxylic acid (**7b**, 135 mg, 0.55 mmol), boric acid



acid (5 mol%) and purified by flash column chromatography (25% EtOAc in hexanes) to give a white solid (140 mg, 79% yield).  $R_f = 0.5$  (30% EtOAc/hexanes). mp 170–172 °C.  $^1\text{H}$  NMR ( $\text{CDCl}_3$ , 400 MHz)  $\delta$ : 7.20–7.18 (m, 2H), 6.67–6.64 (m, 1H), 5.41 (s, 1H), 4.17 (dt,  $J = 6.0, 3.2$  Hz, 1H), 3.71 (s, 3H), 3.39 (tt,  $J = 7.2, 3.6$  Hz, 1H), 3.25 (s, 3H), 3.02 (dt,  $J = 6.0, 3.2$  Hz, 1H), 2.90–2.83 (m, 1H), 2.70 (dd,  $J = 16.8, 12.0$  Hz, 1H).  $^{13}\text{C}\{^1\text{H}\}$  NMR ( $\text{CDCl}_3$ , 100 MHz)  $\delta$ : 171.7, 168.1, 156.2, 153.4, 130.9, 130.2, 129.8, 117.3, 112.5, 97.7, 51.4, 38.2, 30.8, 30.6, 30.4. IR  $\nu_{\text{max}}$  (neat): 2921, 1716, 1683, 1540, 1457, 1265, 801, 737  $\text{cm}^{-1}$ . HRMS (EI)  $m/z$ : [ $\text{M}^+$ ] calcd for  $\text{C}_{15}\text{H}_{16}\text{BrNO}_4$ , 353.0263; found, 353.0266.

#### Methyl 2-methyl-6-oxo-1,4,5,6-tetrahydropyridine-3-carboxylate (14).

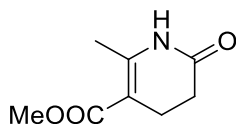

The title compound **14** was synthesized by following general procedure A from enamine **1** (65.0 mg, 0.5 mmol), acrylic acid (**13**, 36.0 mg, 0.55 mmol), boric acid (5 mol%) and purified by flash column chromatography (30% EtOAc in hexanes) to give a white solid (78 mg, 92% yield).  $R_f = 0.5$  (50% EtOAc/hexanes). mp 60–62 °C.  $^1\text{H}$  NMR ( $\text{CDCl}_3$ , 400 MHz)  $\delta$ : 8.05 (s, 1H), 3.74 (s, 3H), 2.66 (t,  $J = 8.4$  Hz, 2H), 2.48 (t,  $J = 8.4$  Hz, 2H), 2.31 (s, 3H).  $^{13}\text{C}\{^1\text{H}\}$  NMR ( $\text{CDCl}_3$ , 100 MHz)  $\delta$ : 172.7, 167.6, 146.0, 103.4, 51.3, 30.1, 21.3, 18.6. IR  $\nu_{\text{max}}$  (neat): 2922, 1716, 1653, 1540, 1265, 1077, 739, 702  $\text{cm}^{-1}$ . HRMS (EI)  $m/z$ : [ $\text{M}^+$ ] calcd for  $\text{C}_8\text{H}_{11}\text{NO}_3$ , 169.0739; found, 169.0741.

#### Procedure for the preparation of compound **25**.

To a stirred solution of compound **9a** (0.5 mmol) in dry toluene (5 mL) was added boric acid (5 mol%) at room temperature. The resulting mixture was refluxed for 10 h in an oil bath. After completion of the reaction, the solution was evaporated and the residue was diluted with ethyl acetate (100 mL), washed with water (30 mL) and brine (30 mL). The organic layer was then dried over anhydrous  $\text{MgSO}_4$  and concentrated under reduced pressure to provide the crude product which was further purified by column chromatography (60% EtOAc in hexanes) to obtain the compound **25**.

#### Methyl 2-(4-oxo-3,4,5,6-tetrahydro-2H-2,6-methanobenzo[*g*][1,3]oxazocin-2-yl)acetate (25).

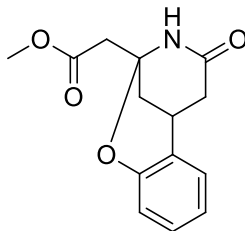

White solid (49.5 mg, 99% yield).  $R_f = 0.3$  (50% EtOAc/hexanes). mp 118–120 °C.  $^1\text{H}$  NMR ( $\text{CDCl}_3$ , 400 MHz)  $\delta$ : 7.33 (bs, 1H), 7.15 (td,  $J = 7.2, 1.6$  Hz, 1H), 7.10 (dd,  $J = 7.2, 1.6$  Hz, 1H), 6.94 (td,  $J = 7.2, 1.6$  Hz, 1H), 6.78 (dd,  $J = 8.4, 0.8$  Hz, 1H), 3.80 (s, 3H), 3.28–3.25 (m, 1H), 3.00, 2.87 (ABq,  $J = 15.2$  Hz, 1H each), 2.71 (dd,  $J = 17.2, 4.8$  Hz, 1H), 2.64–2.60 (m, 1H), 2.22 (d,  $J = 3.2$  Hz, 2H).  $^{13}\text{C}\{^1\text{H}\}$  NMR ( $\text{CDCl}_3$ , 100 MHz)  $\delta$ : 170.8, 169.5, 150.7, 129.1, 128.7, 124.4, 121.8, 117.7, 82.3, 52.3, 44.3, 40.6, 32.0, 29.1. IR  $\nu_{\text{max}}$  (neat): 3239, 2943, 1711, 1629, 1292, 1195, 1036, 867, 732  $\text{cm}^{-1}$ . HRMS (EI)  $m/z$ :  $[\text{M}^+]$  calcd for  $\text{C}_{14}\text{H}_{15}\text{NO}_4$ , 261.1001; found, 261.1003.

Procedure for the preparation of compound **26**.

To a stirred solution of compound **5g** (100 mg, 0.3 mmol) in dry toluene (5 mL) was added DDQ (69 mg, 0.3 mmol) at room temperature. The resulting mixture was stirred at 90 °C for 1 h in an oil bath. After completion of the reaction, the reaction mixture was diluted with ethyl acetate (100 mL), washed with saturated  $\text{NaHCO}_3$  solution (3 x 30 mL) and brine (30 mL). The organic layer was then dried over anhydrous  $\text{MgSO}_4$  and concentrated under reduced pressure to provide the crude product which was further purified by column chromatography (60% EtOAc in hexanes) to obtain the compound **26**.

**Methyl 5-cyano-4-(3,4-dimethoxyphenyl)-2-methyl-6-oxo-1,6-dihydropyridine-3-carboxylate (26).**

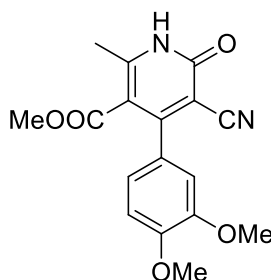

White solid (96 mg, 97% yield).  $R_f = 0.3$  (50% EtOAc/hexanes). mp 182–184 °C.  $^1\text{H}$  NMR ( $\text{CDCl}_3$ , 400 MHz)  $\delta$ : 13.59 (s, 1H), 7.00 (dd,  $J = 8.4, 2.0$  Hz, 1H), 6.95 (d,  $J = 8.4$  Hz, 1H), 6.90 (d,  $J = 2.0$  Hz, 1H), 3.94 (s, 3H), 3.91 (s, 3H), 3.53 (s, 3H), 2.59 (s, 3H).  $^{13}\text{C}\{^1\text{H}\}$  NMR ( $\text{DMSO-}d_6$ , 100 MHz)  $\delta$ : 166.4, 160.5, 159.4, 152.5, 150.4, 148.8, 128.0, 120.8, 116.3, 112.8, 112.0, 111.1, 100.7, 56.1, 56.0, 52.7, 18.6. IR  $\nu_{\text{max}}$  (neat): 2992, 2242, 1740, 1632, 1414, 1270, 795, 630  $\text{cm}^{-1}$ . HRMS (EI)  $m/z$ :  $[\text{M}^+]$  calcd for  $\text{C}_{17}\text{H}_{16}\text{N}_2\text{O}_5$ , 328.1059; found, 328.1057.

Procedure for the preparation of compound **27**.

To a compound **26** (50.0 mg, 0.15 mmol) was added  $\text{POCl}_3$  (3 mL) at 0 °C. The resulting mixture was stirred at 90 °C for 3 h in an oil bath. After completion of the reaction,  $\text{POCl}_3$  was removed from the reaction mixture under vacuum. Ice cold water (50 mL) was added to the residue. The resulting solution was basified with aqueous  $\text{NaOH}$  (1N) solution and then extracted with ethyl acetate (2 x 50 mL). The combined organic layer was washed with brine (30 mL),

dried over anhydrous  $\text{MgSO}_4$  and concentrated under reduced pressure to provide the crude product which was further purified by column chromatography (15% EtOAc in hexanes) to obtain the desired compound **27**.

**Methyl 6-chloro-5-cyano-4-(3,4-dimethoxyphenyl)-2-methylnicotinate (27).**

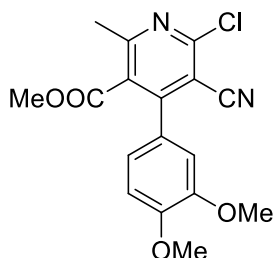

Yellow solid (47.0 mg, 88% yield).  $R_f = 0.5$  (50% EtOAc/hexanes). mp 176–178 °C.  $^1\text{H}$  NMR ( $\text{CDCl}_3$ , 400 MHz)  $\delta$ : 7.00–6.95 (m, 2H), 6.90 (d,  $J = 1.2$  Hz, 1H), 3.94 (s, 3H), 3.91 (s, 3H), 3.65 (s, 3H), 2.64 (s, 3H).  $^{13}\text{C}\{^1\text{H}\}$  NMR ( $\text{CDCl}_3$ , 100 MHz)  $\delta$ : 166.9, 159.8, 153.9, 153.2, 150.7, 149.1, 128.6, 125.9, 121.3, 114.3, 111.2 (2C), 108.2, 56.1, 56.0, 53.0, 23.2. IR  $\nu_{\text{max}}$  (neat): 2992, 2250, 1740, 1632, 1414, 1270, 795, 630  $\text{cm}^{-1}$ . HRMS (EI)  $m/z$ :  $[\text{M}^+]$  calcd for  $\text{C}_{17}\text{H}_{15}\text{ClN}_2\text{O}_4$ , 346.0720; found, 346.0723.

Reference:

1. B. Wanner, J. Mahatthananchai and J. W. Bode, *Org. Lett.*, 2011, **13**, 5378–5381.

<sup>1</sup>H NMR of compound **5a** (DMSO-*d*<sub>6</sub>)

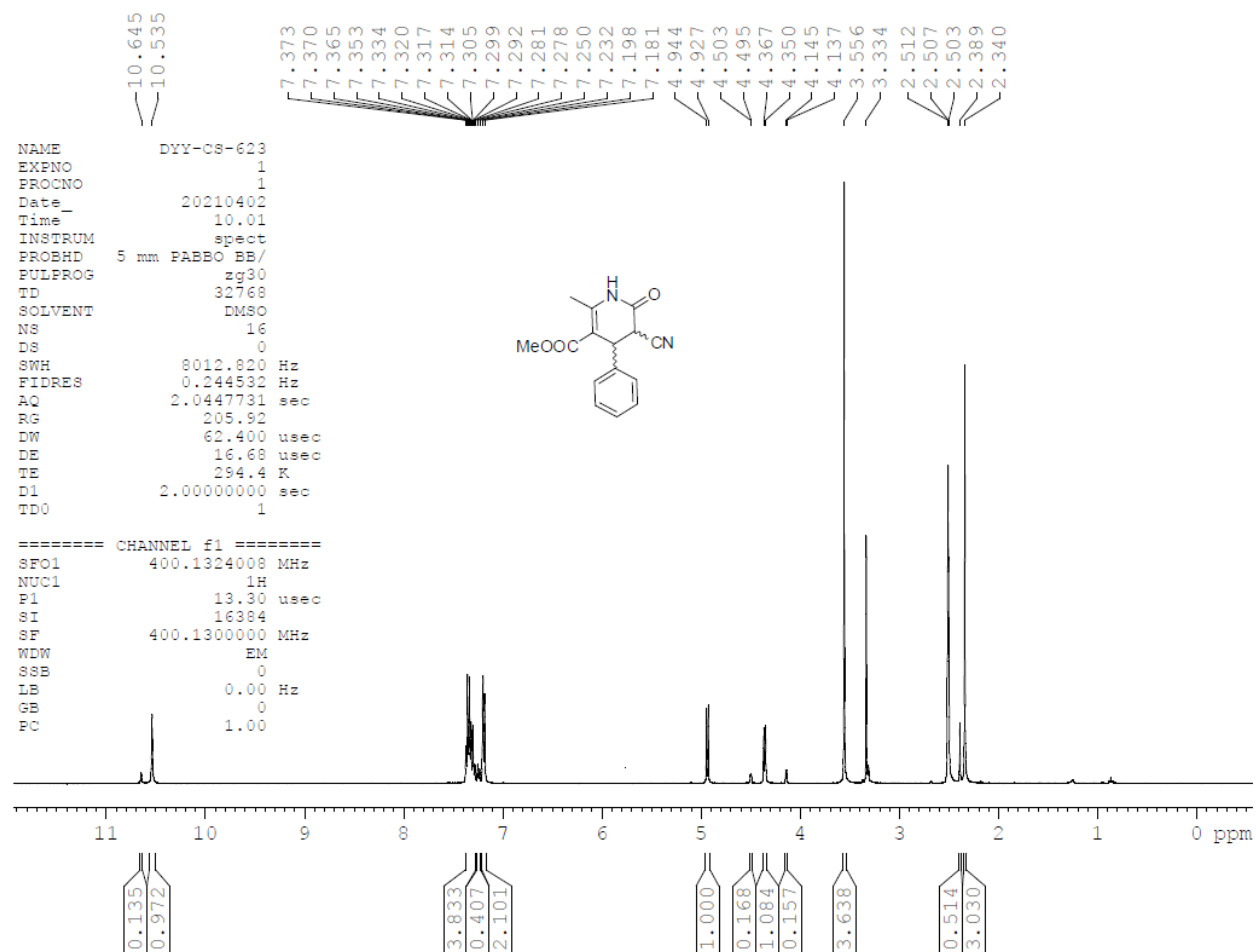

<sup>13</sup>C NMR of compound **5a** (DMSO-*d*<sub>6</sub>)

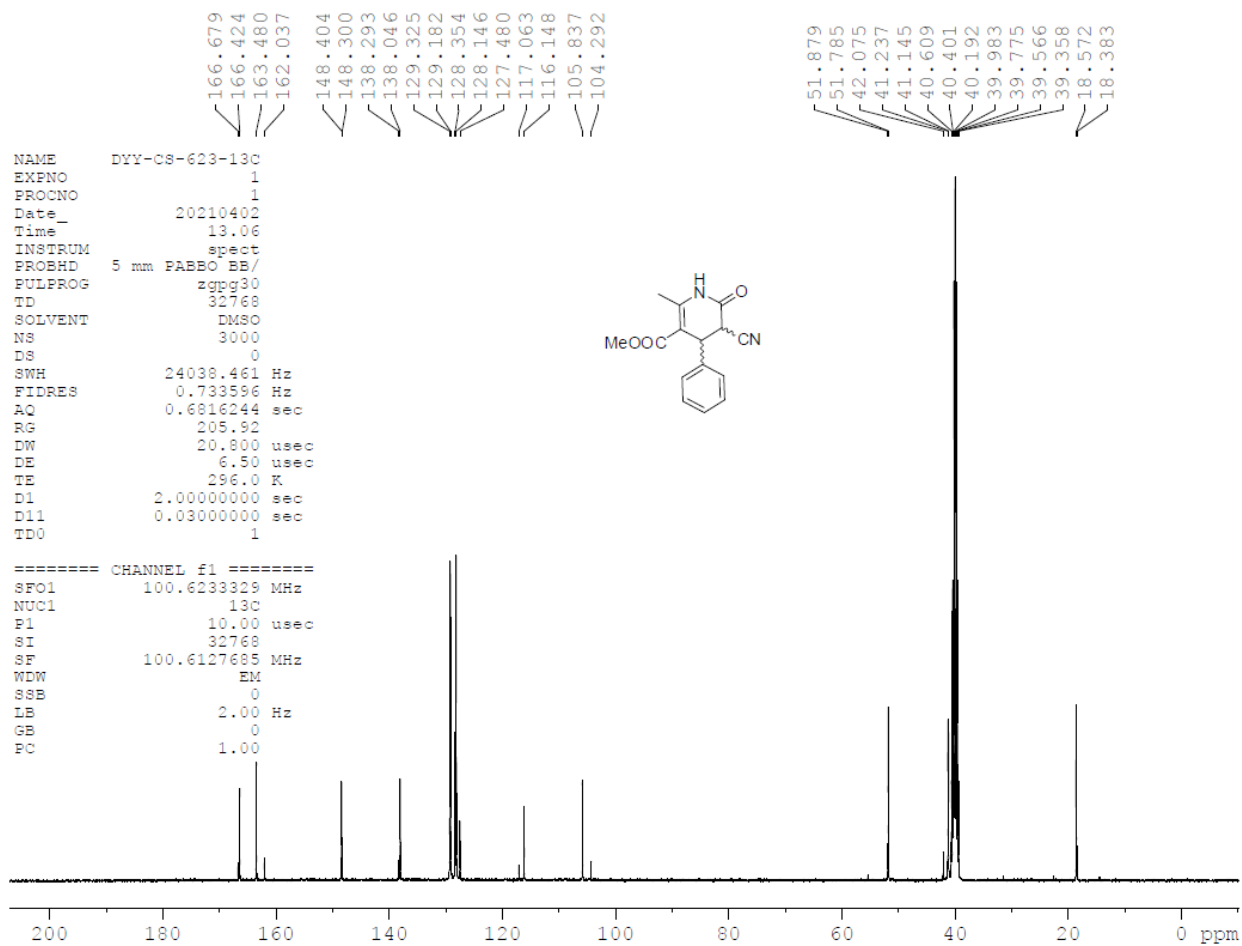

<sup>1</sup>H NMR of compound **5b** (CDCl<sub>3</sub>)

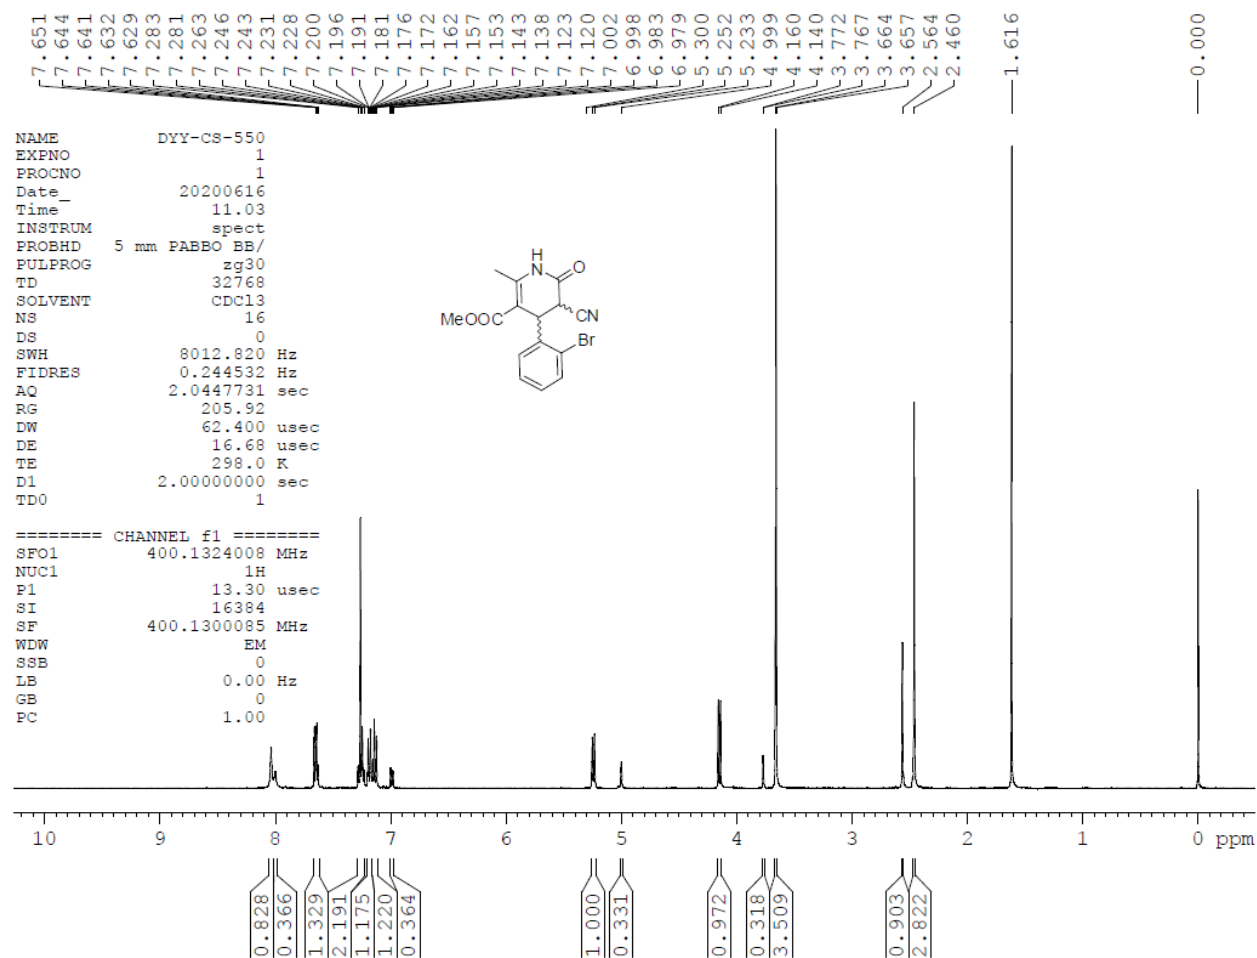

<sup>13</sup>C NMR of compound **5b** (CD<sub>3</sub>OD)

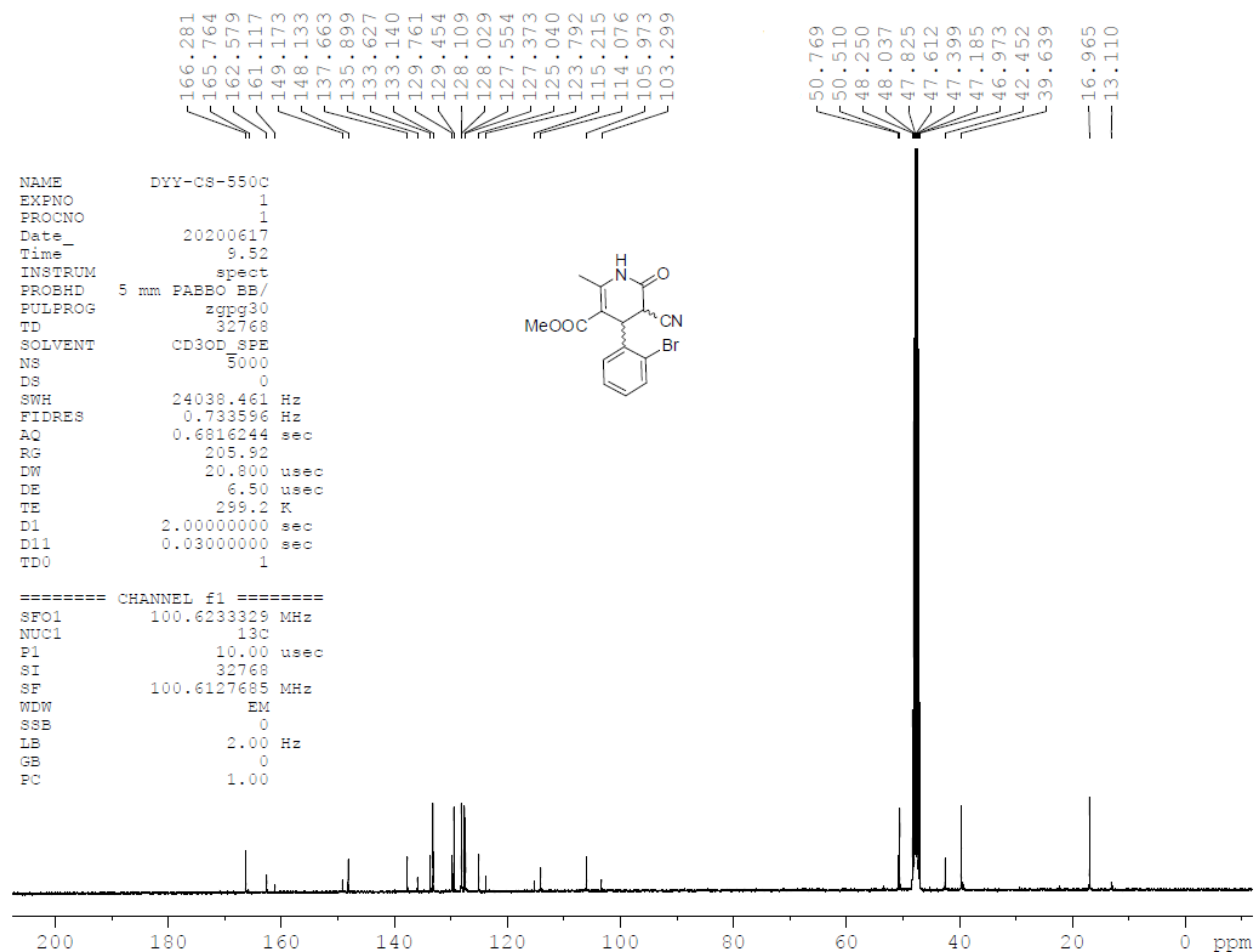

<sup>1</sup>H NMR of compound **5c** (DMSO-*d*<sub>6</sub>)

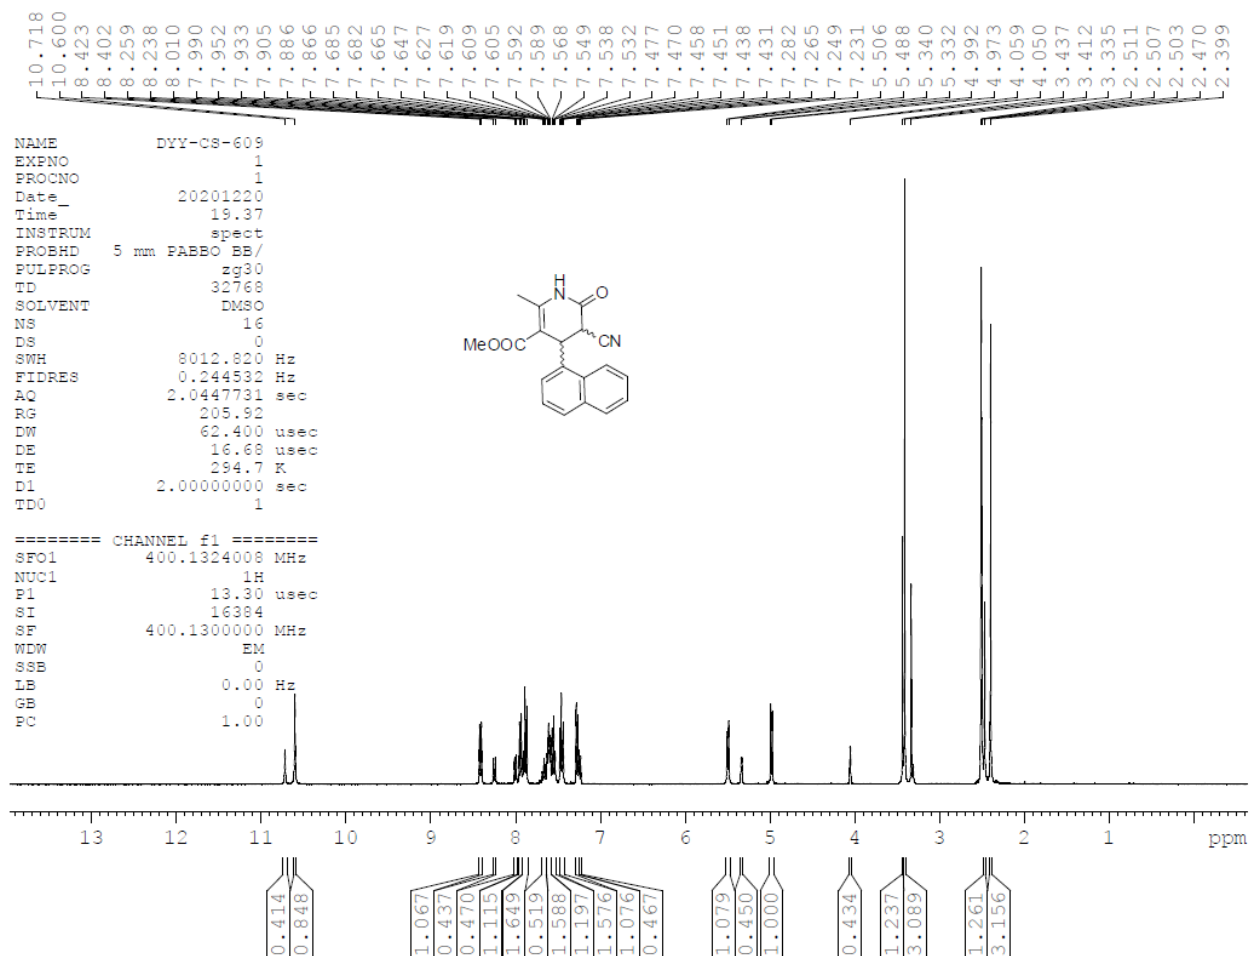



<sup>13</sup>C NMR of compound **5c** (DMSO-*d*<sub>6</sub>)

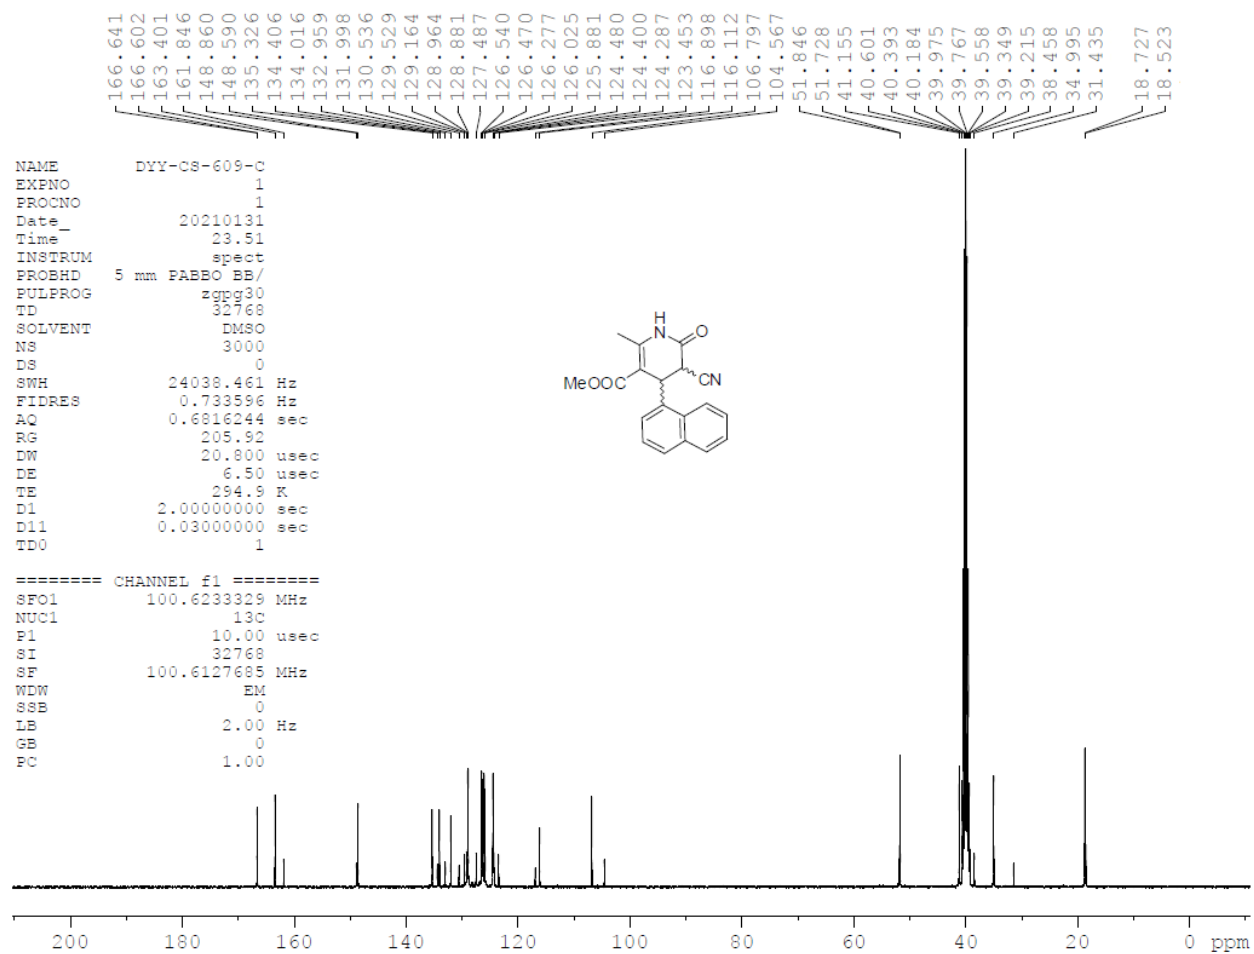

<sup>1</sup>H NMR of compound **5d** (DMSO-*d*<sub>6</sub>)

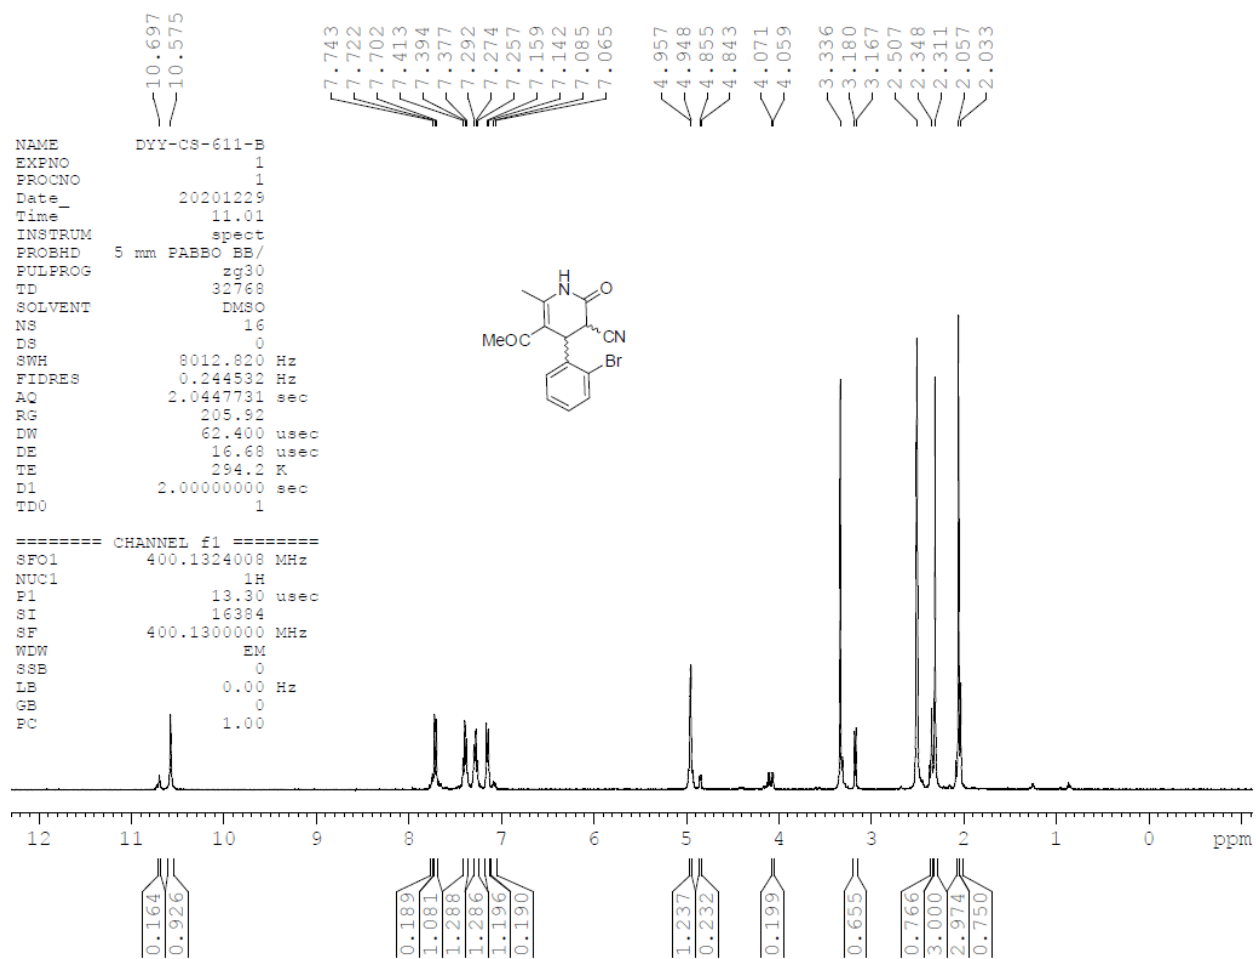

<sup>13</sup>C NMR of compound **5d** (DMSO-*d*<sub>6</sub>)

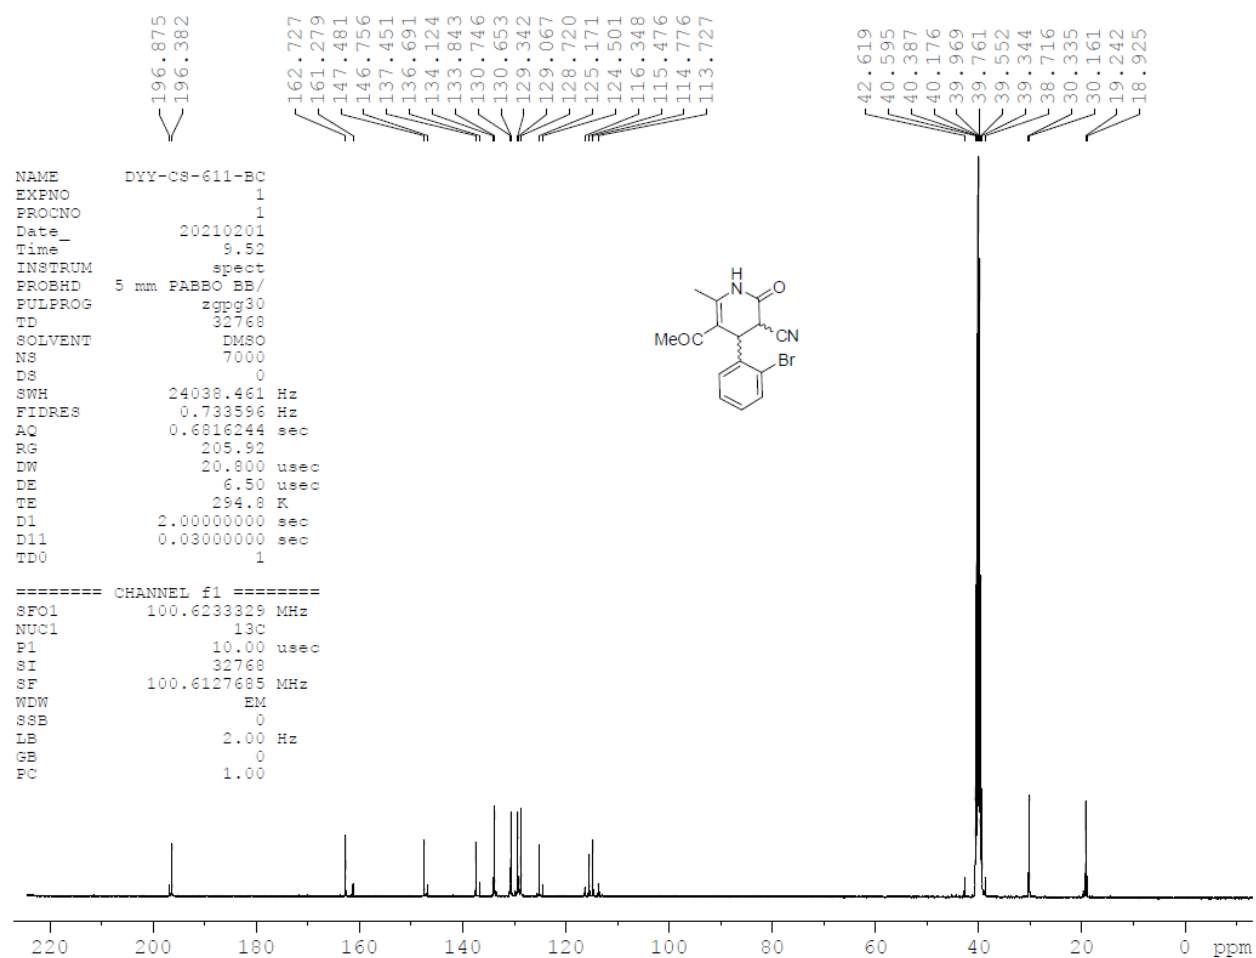

<sup>1</sup>H NMR of compound **5e** (CDCl<sub>3</sub>)

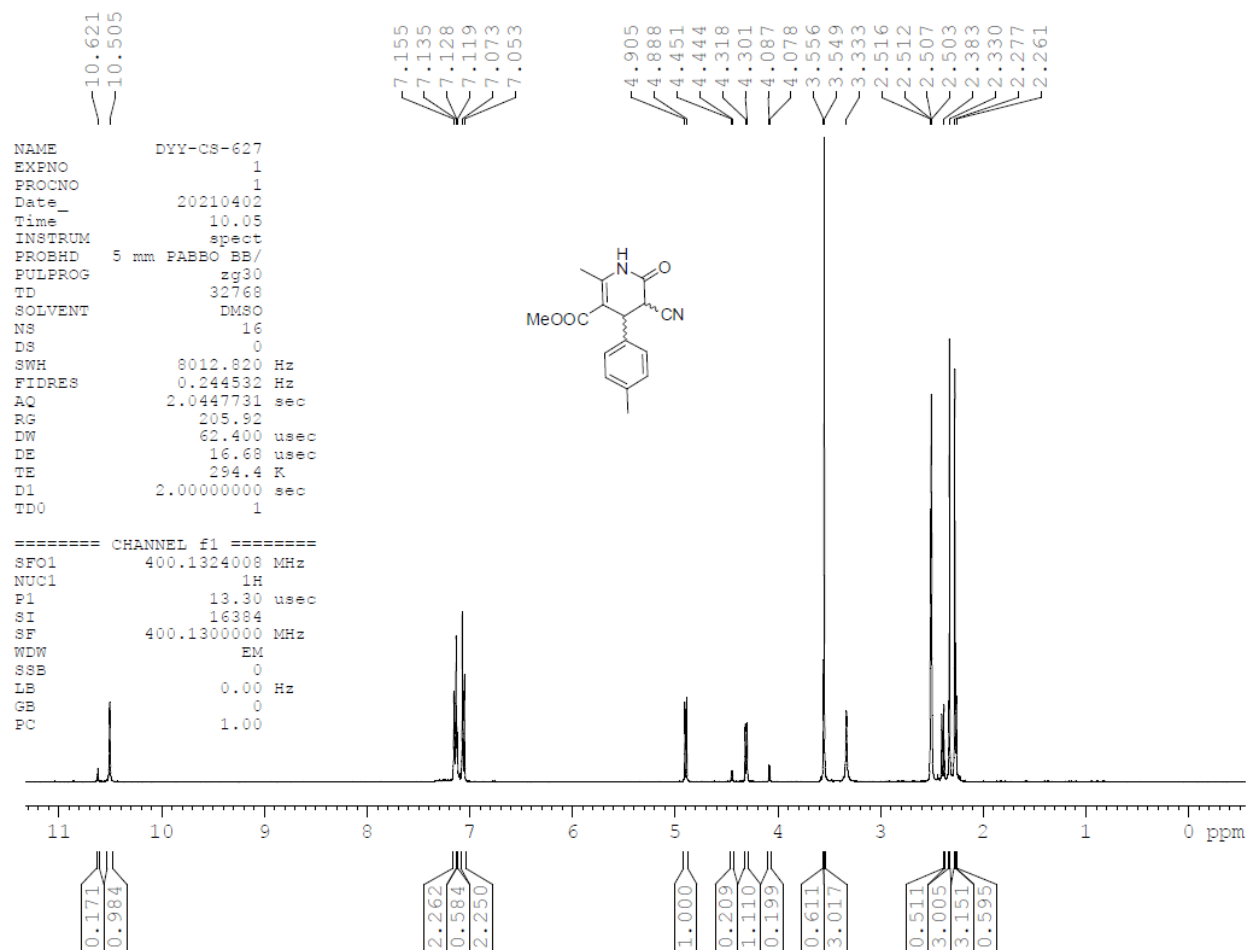

<sup>13</sup>C NMR of compound **5e** (DMSO-*d*<sub>6</sub>)

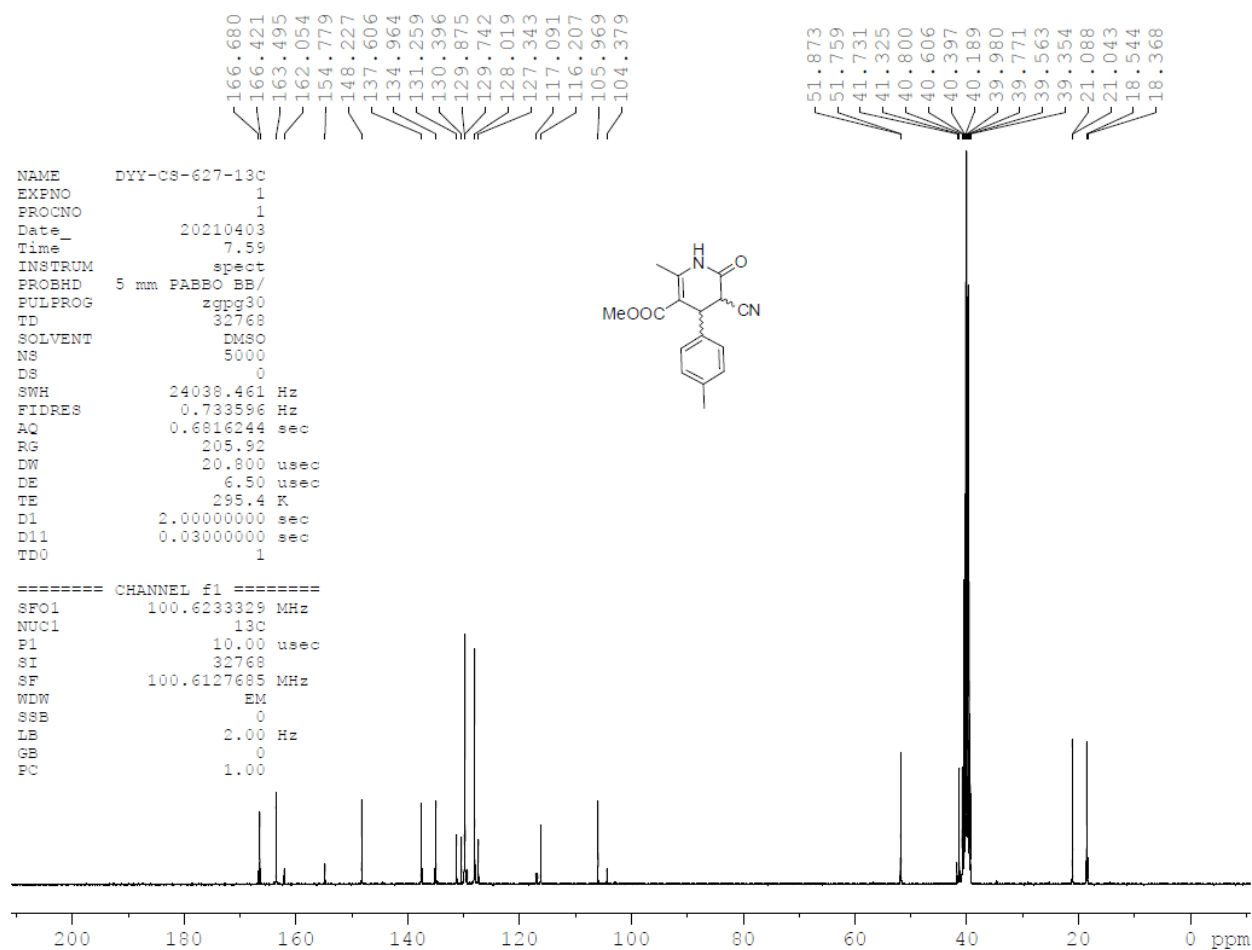

<sup>1</sup>H NMR of compound **5f** (CDCl<sub>3</sub>)

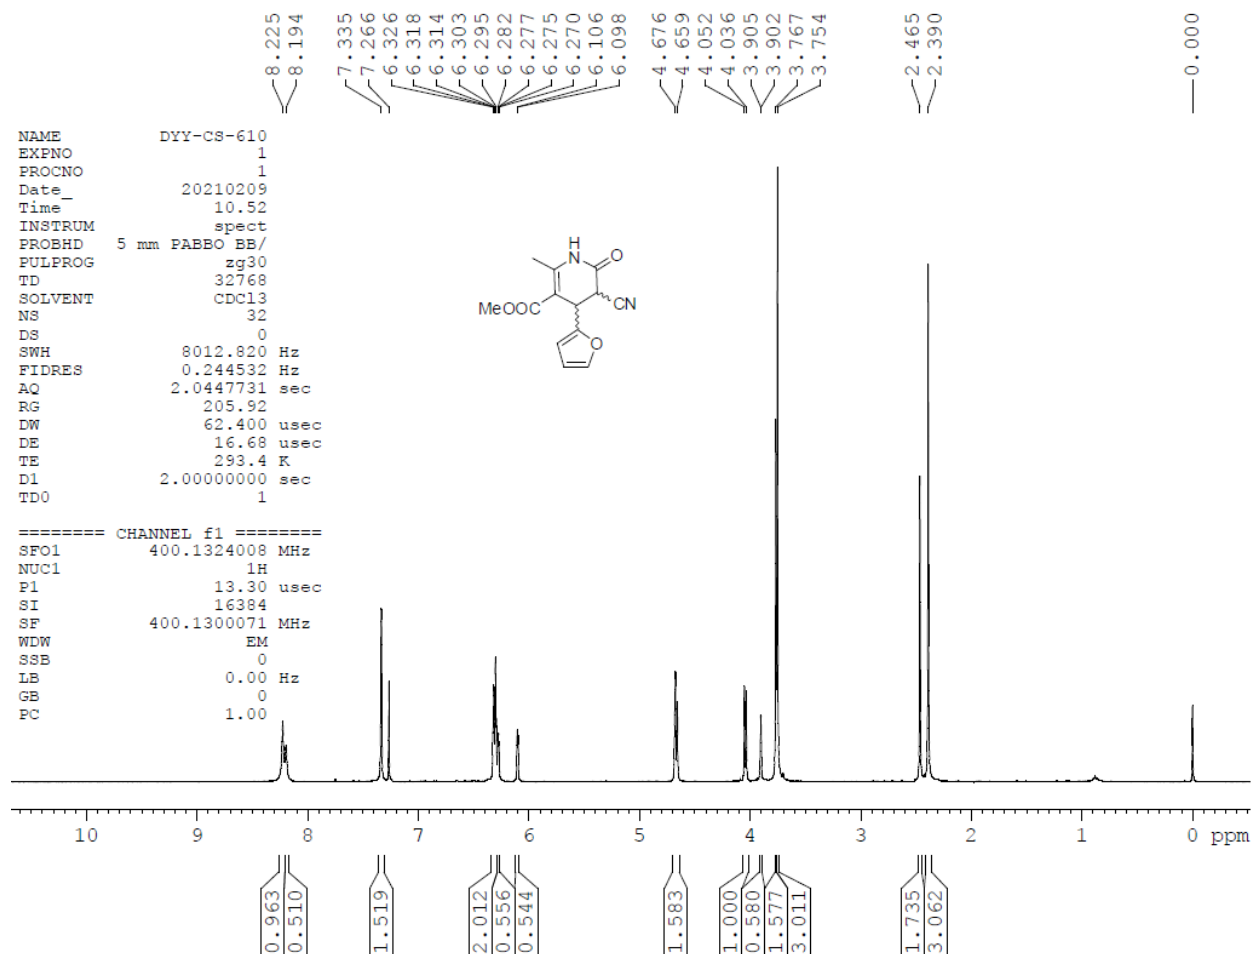

<sup>13</sup>C NMR of compound **5f** (CD<sub>3</sub>OD)

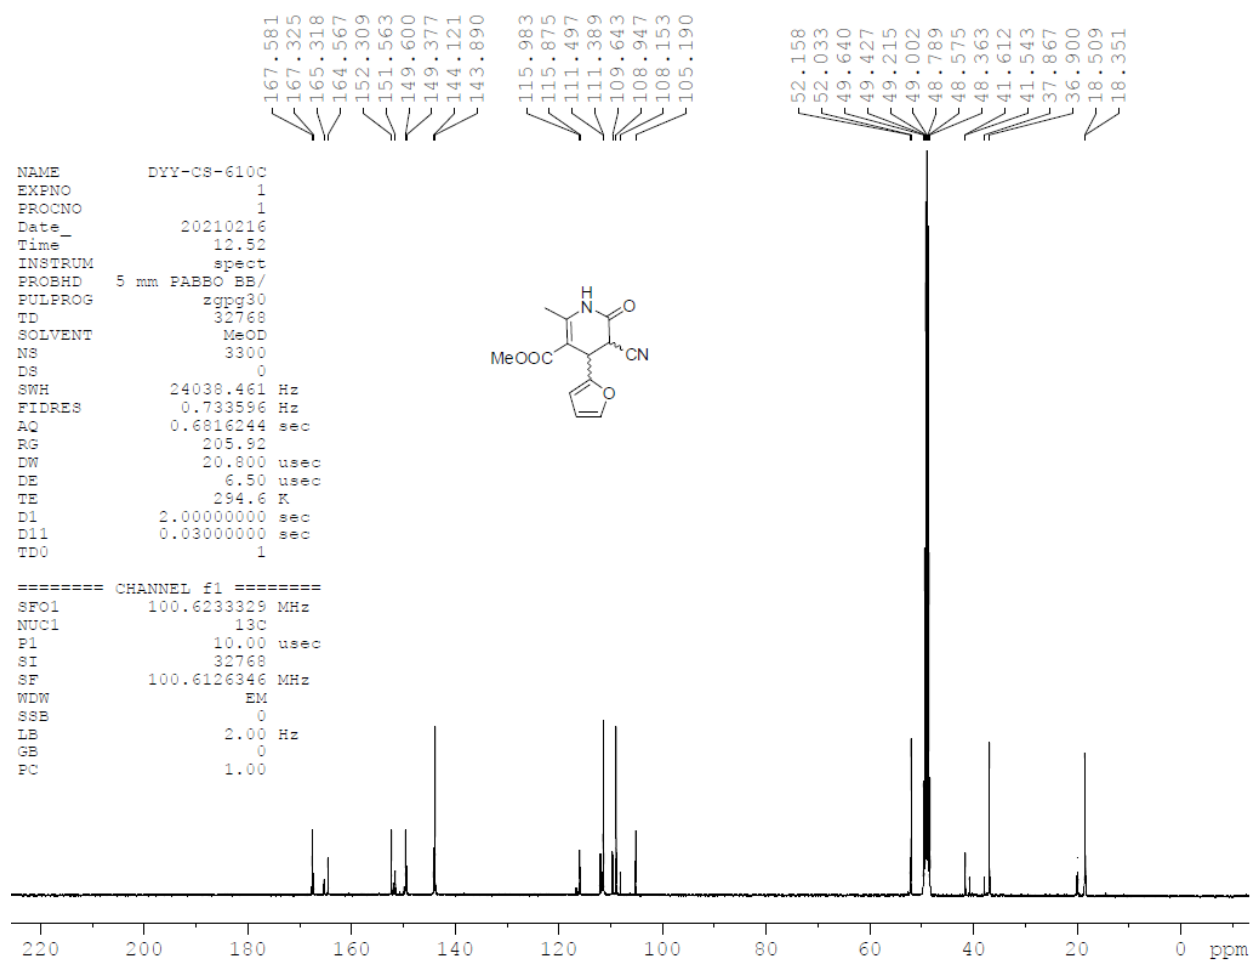

<sup>1</sup>H NMR of compound **5g** (CDCl<sub>3</sub>)

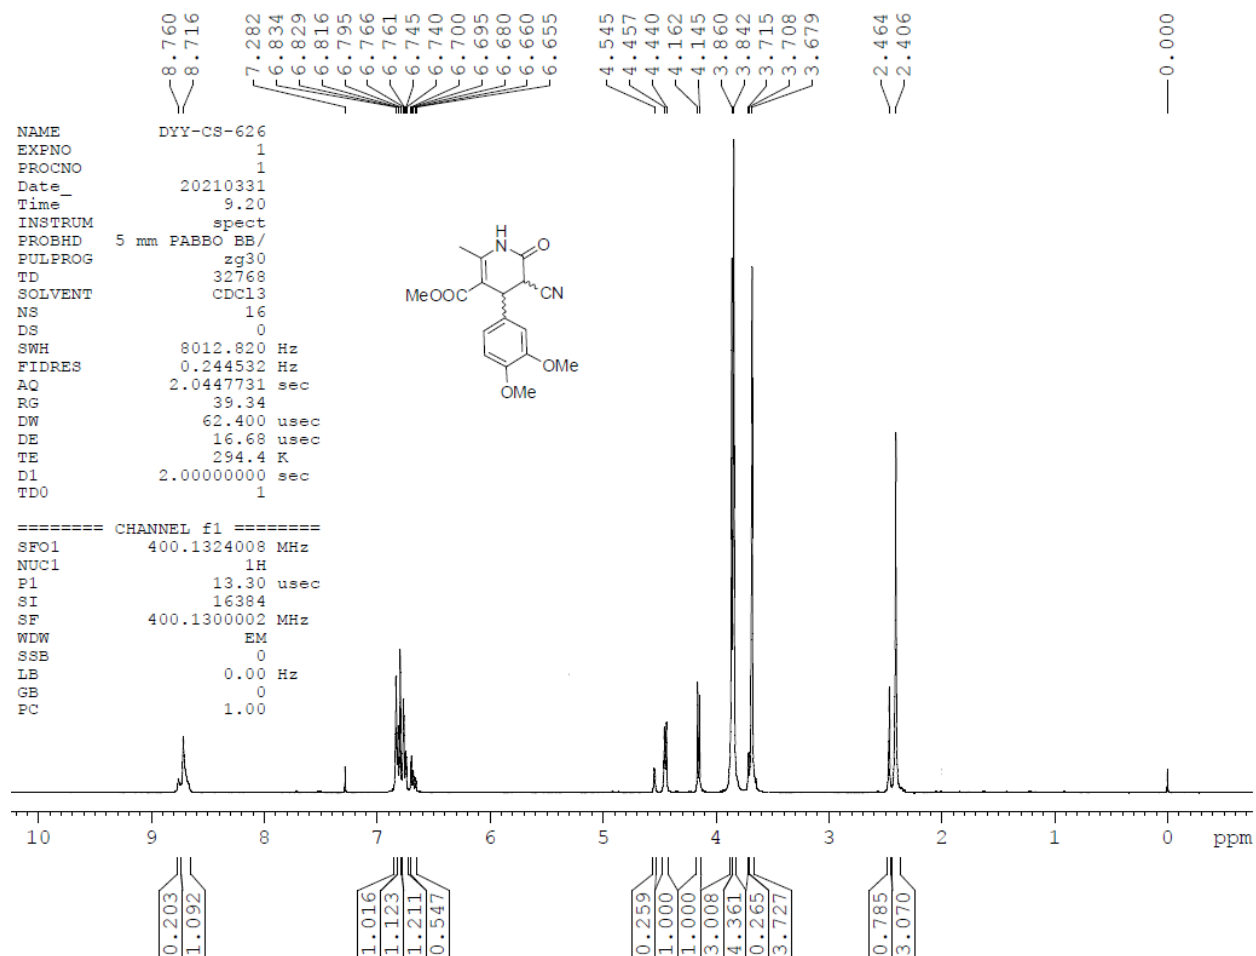



<sup>13</sup>C NMR of compound **5g** (CDCl<sub>3</sub>)

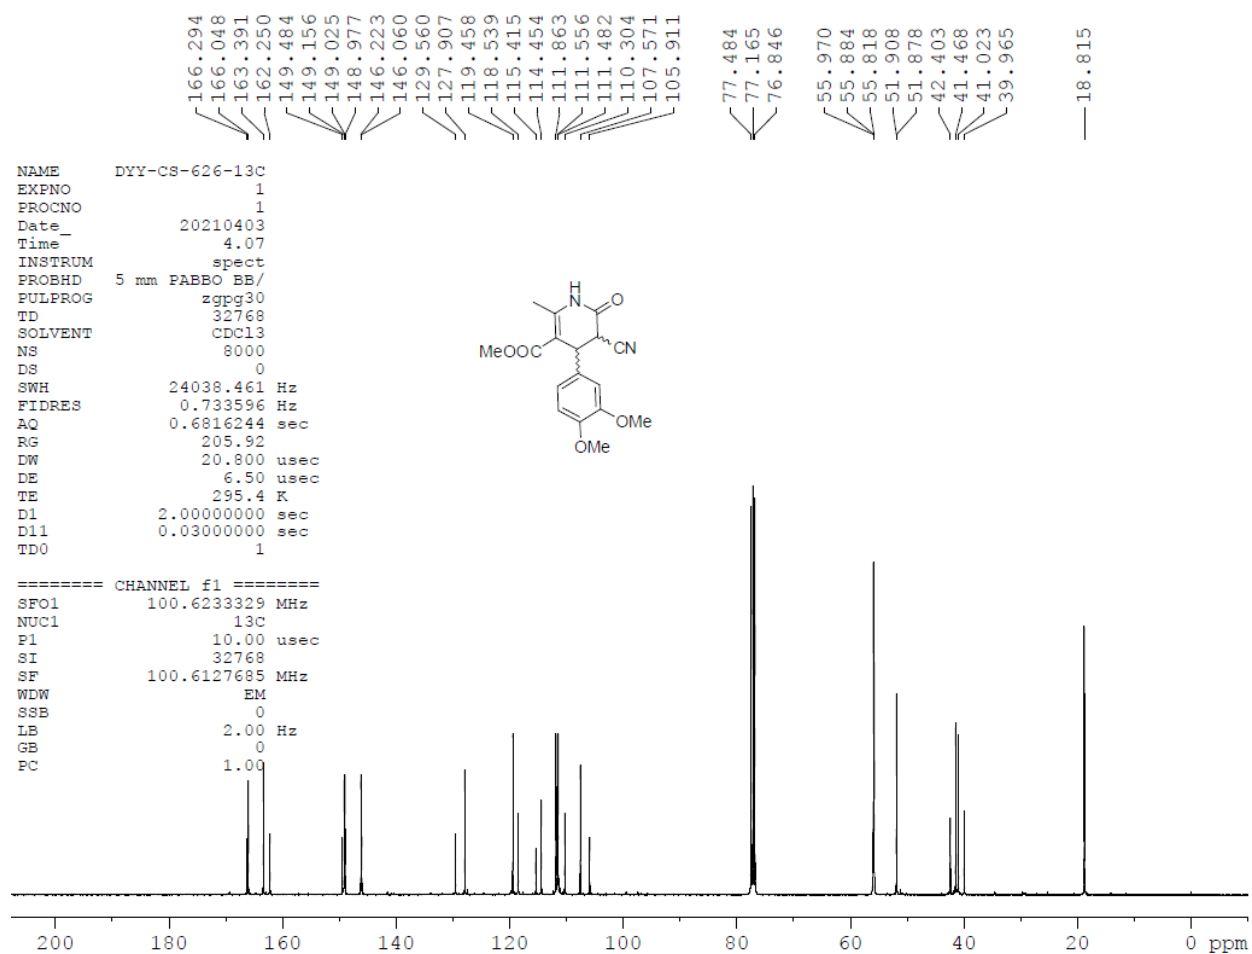

<sup>1</sup>H NMR of compound **5h** (CDCl<sub>3</sub>)

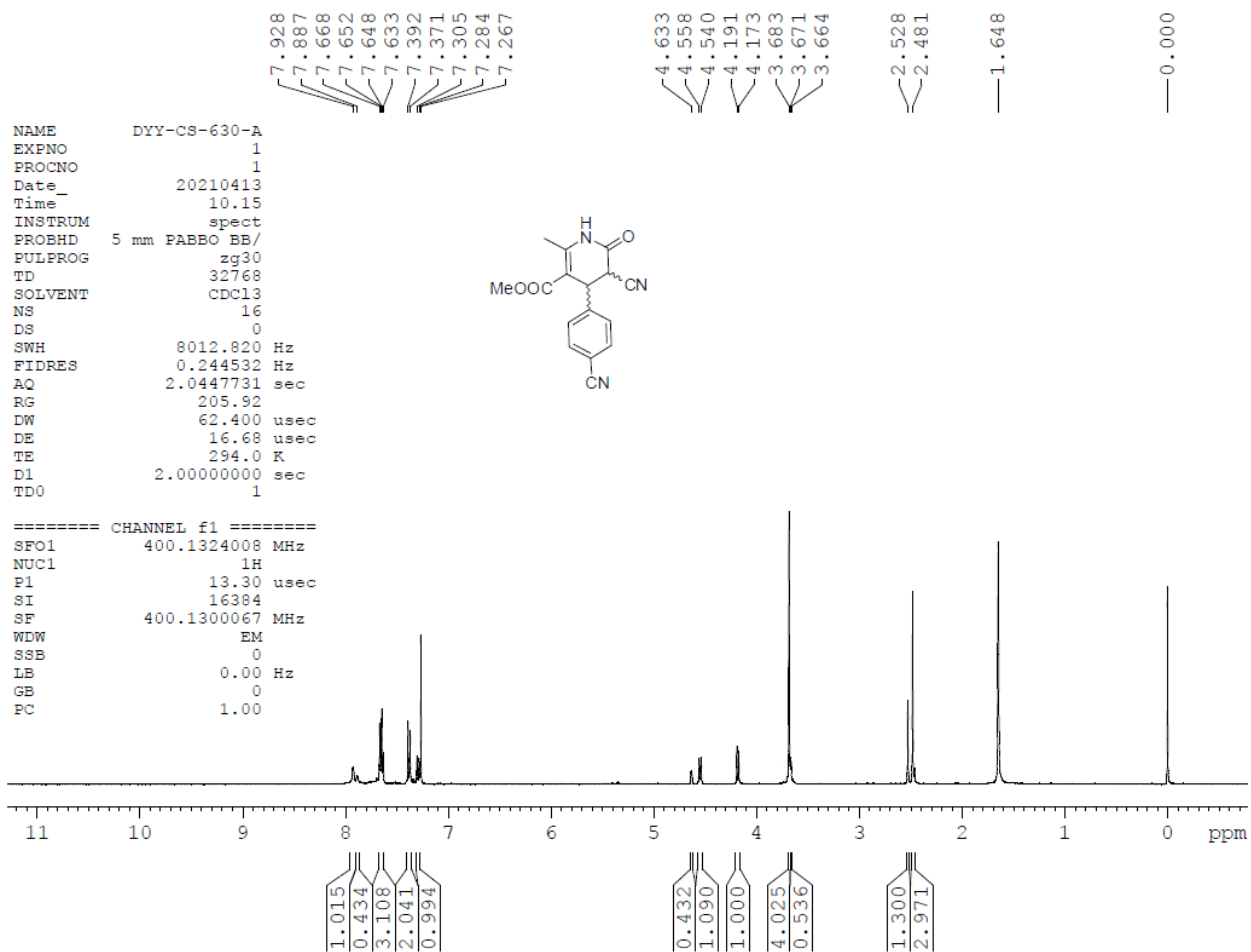

<sup>13</sup>C NMR of compound **5h** (CDCl<sub>3</sub>)

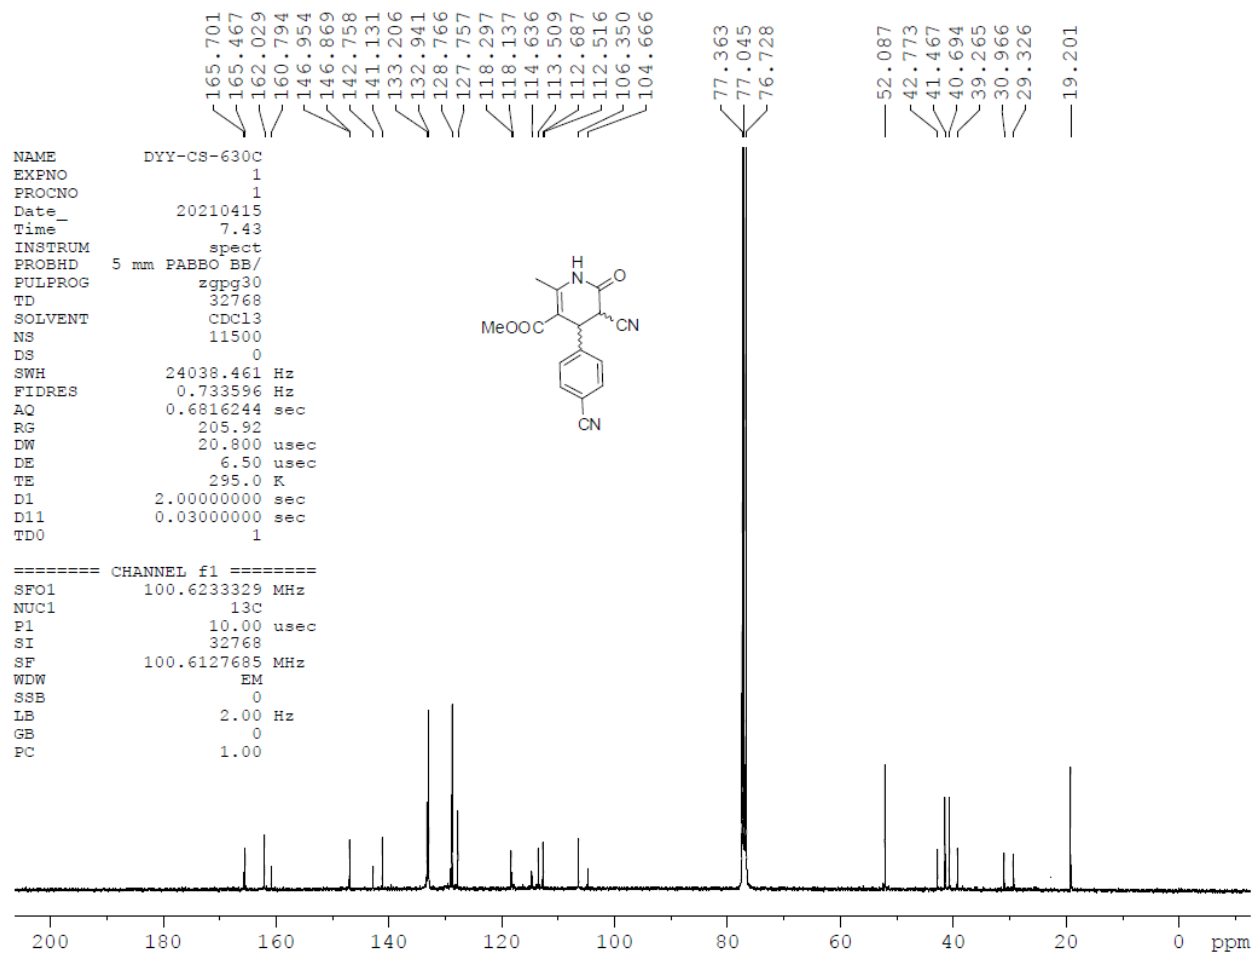

<sup>1</sup>H NMR of compound **5i** (CDCl<sub>3</sub>)

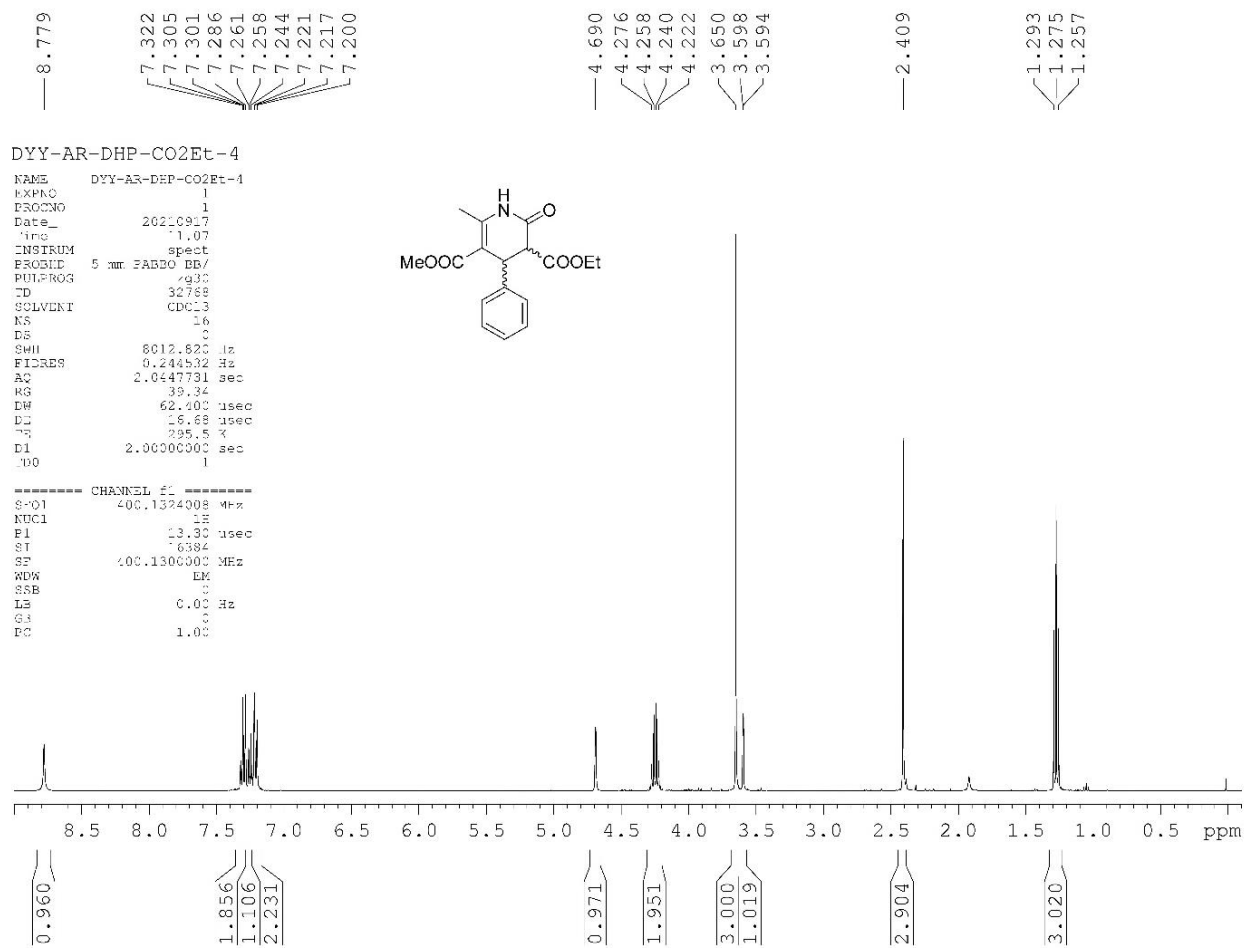

<sup>13</sup>C NMR of compound **5i** (CDCl<sub>3</sub>)

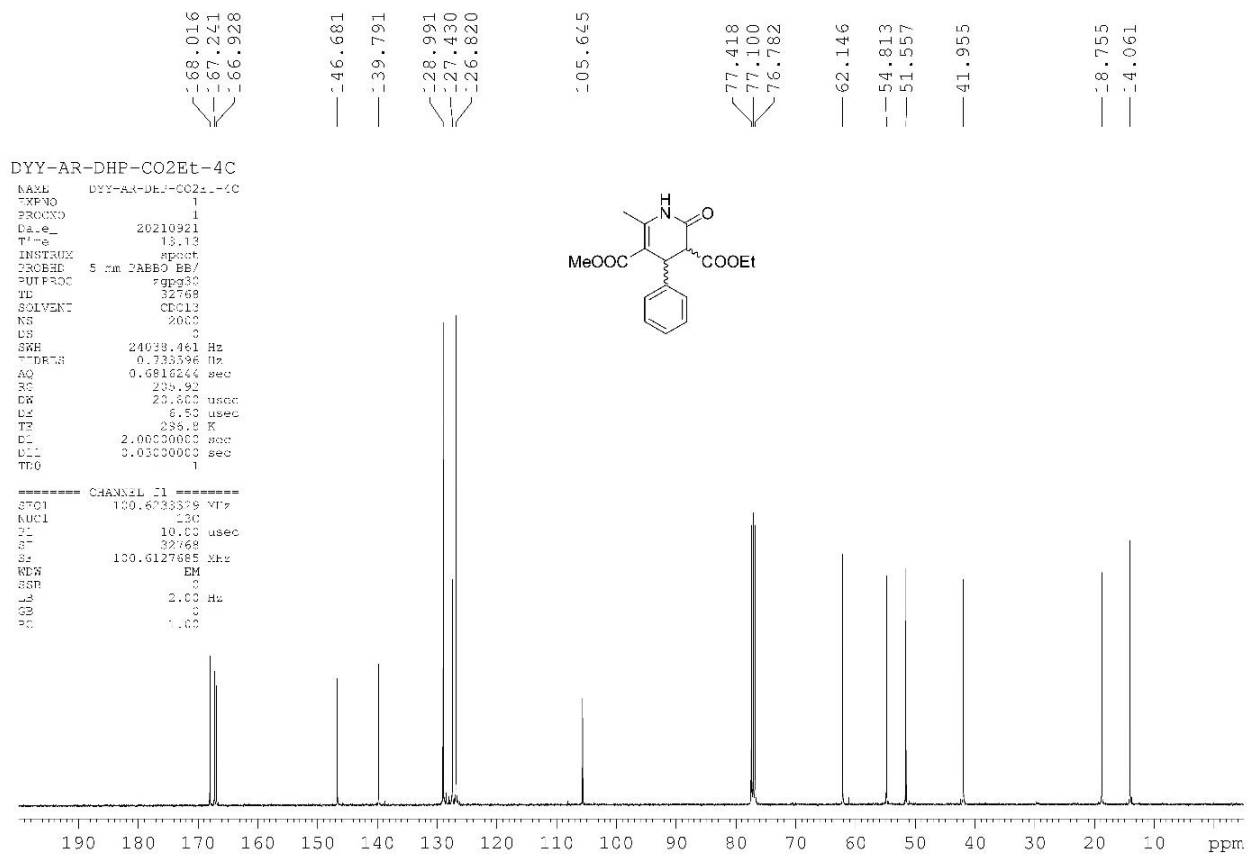

<sup>1</sup>H NMR of compound **5j** (CDCl<sub>3</sub>)

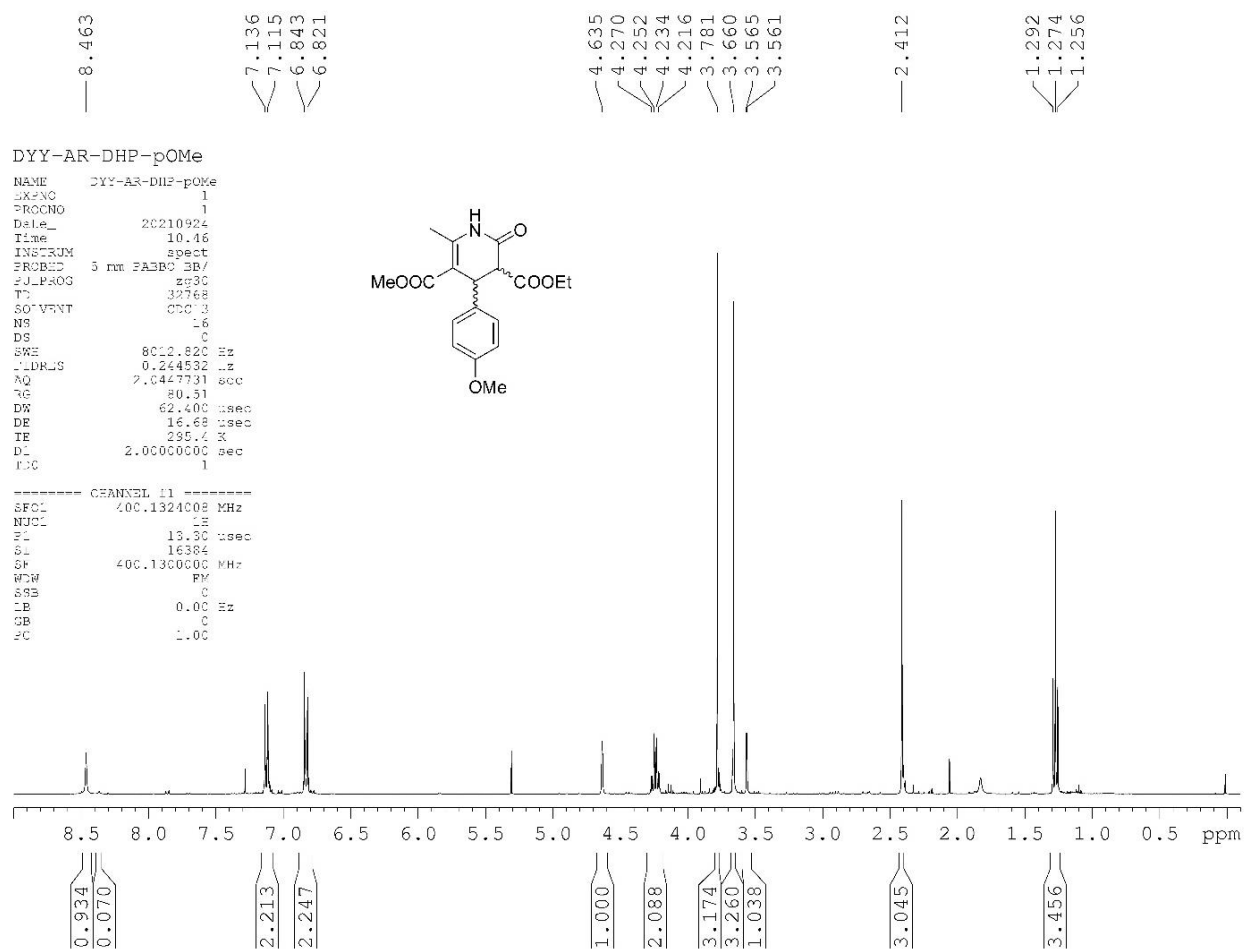

<sup>13</sup>C NMR of compound **5j** (CDCl<sub>3</sub>)

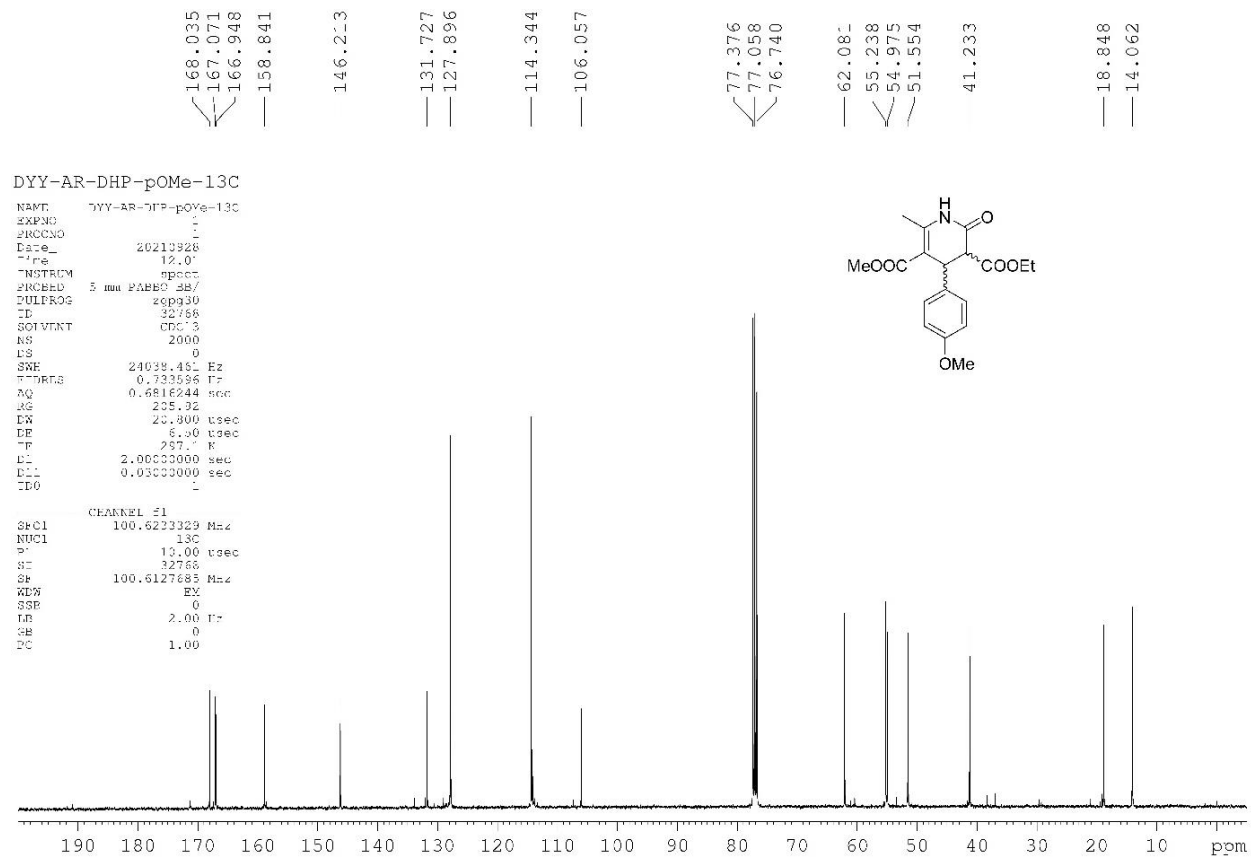

<sup>1</sup>H NMR of compound **5k** (CDCl<sub>3</sub>)

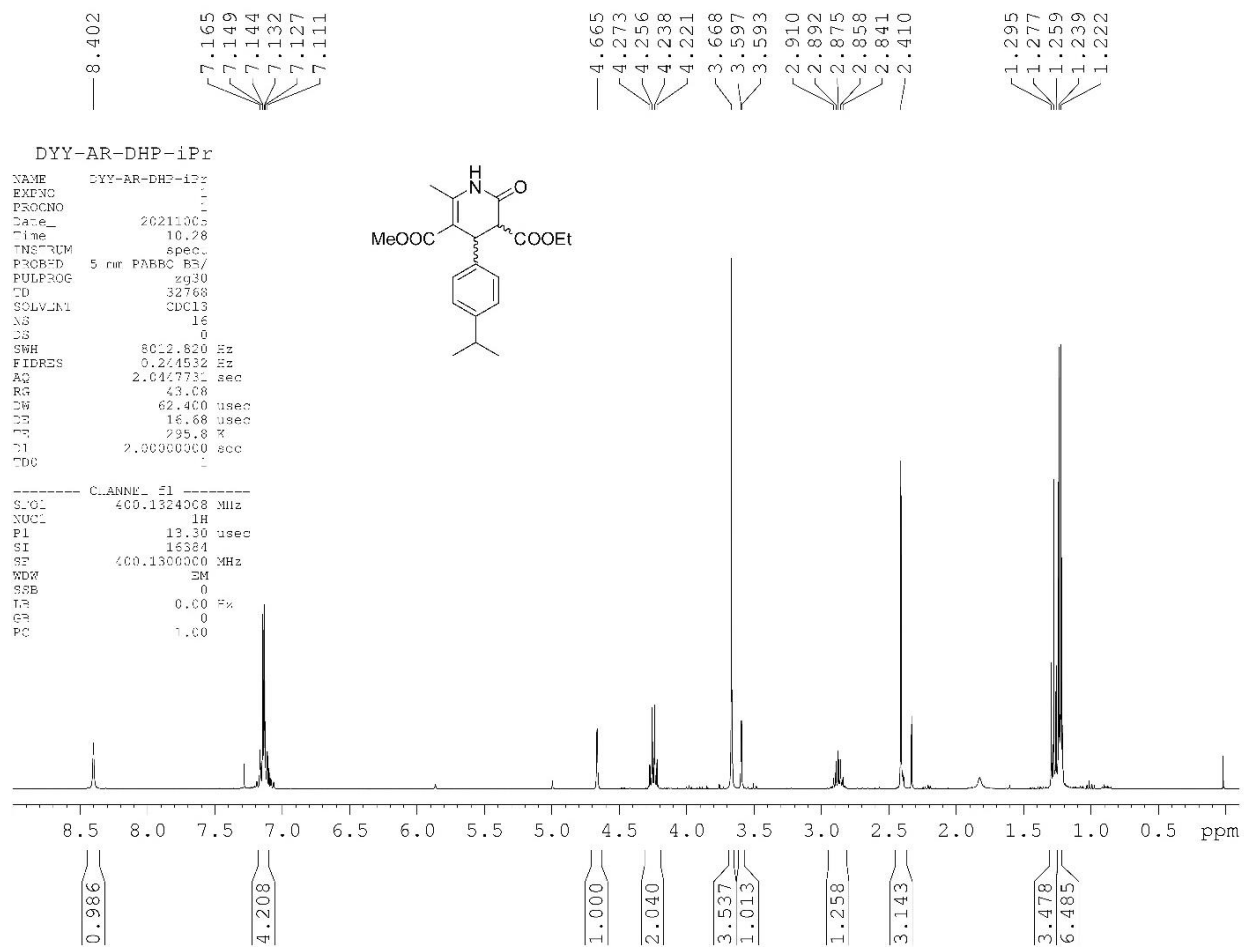



<sup>13</sup>C NMR of compound **5k** (CDCl<sub>3</sub>)

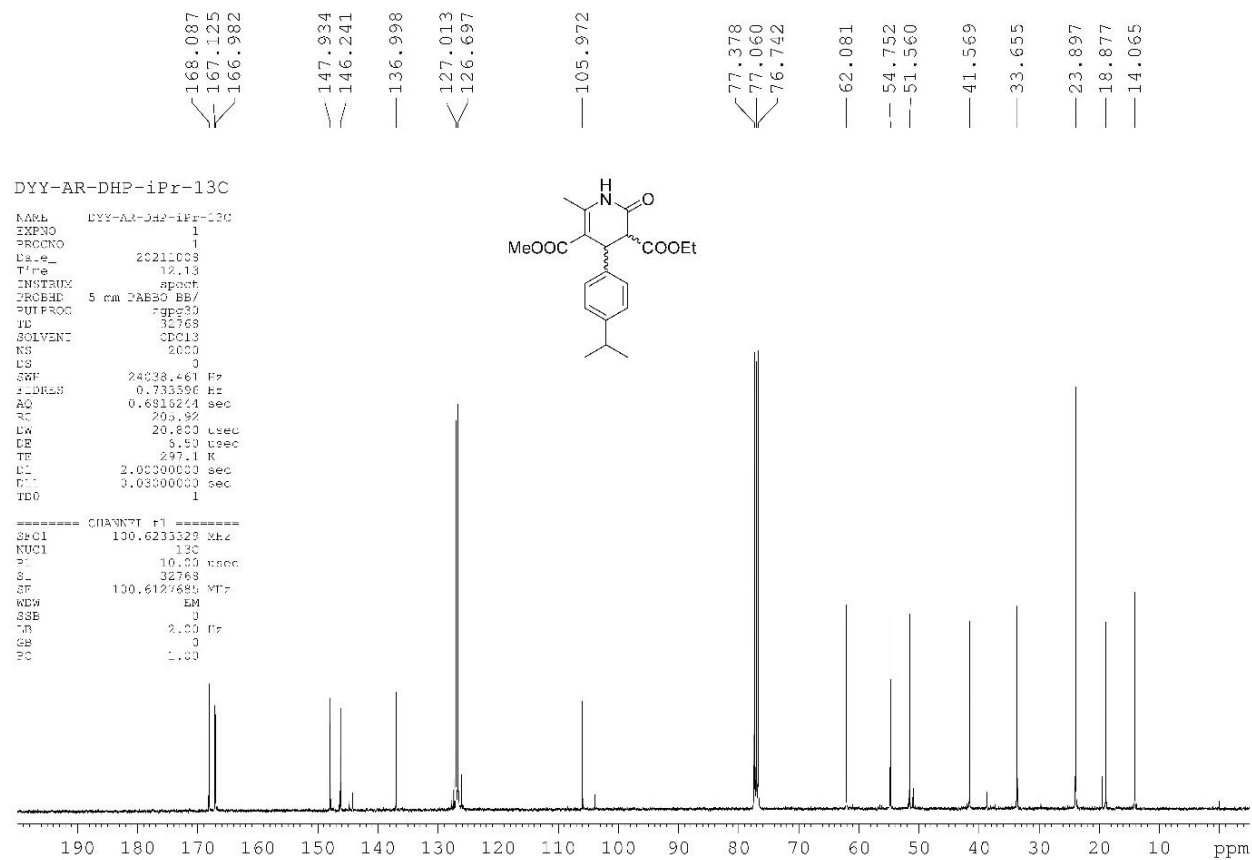

<sup>1</sup>H NMR of compound **51** (CDCl<sub>3</sub>)

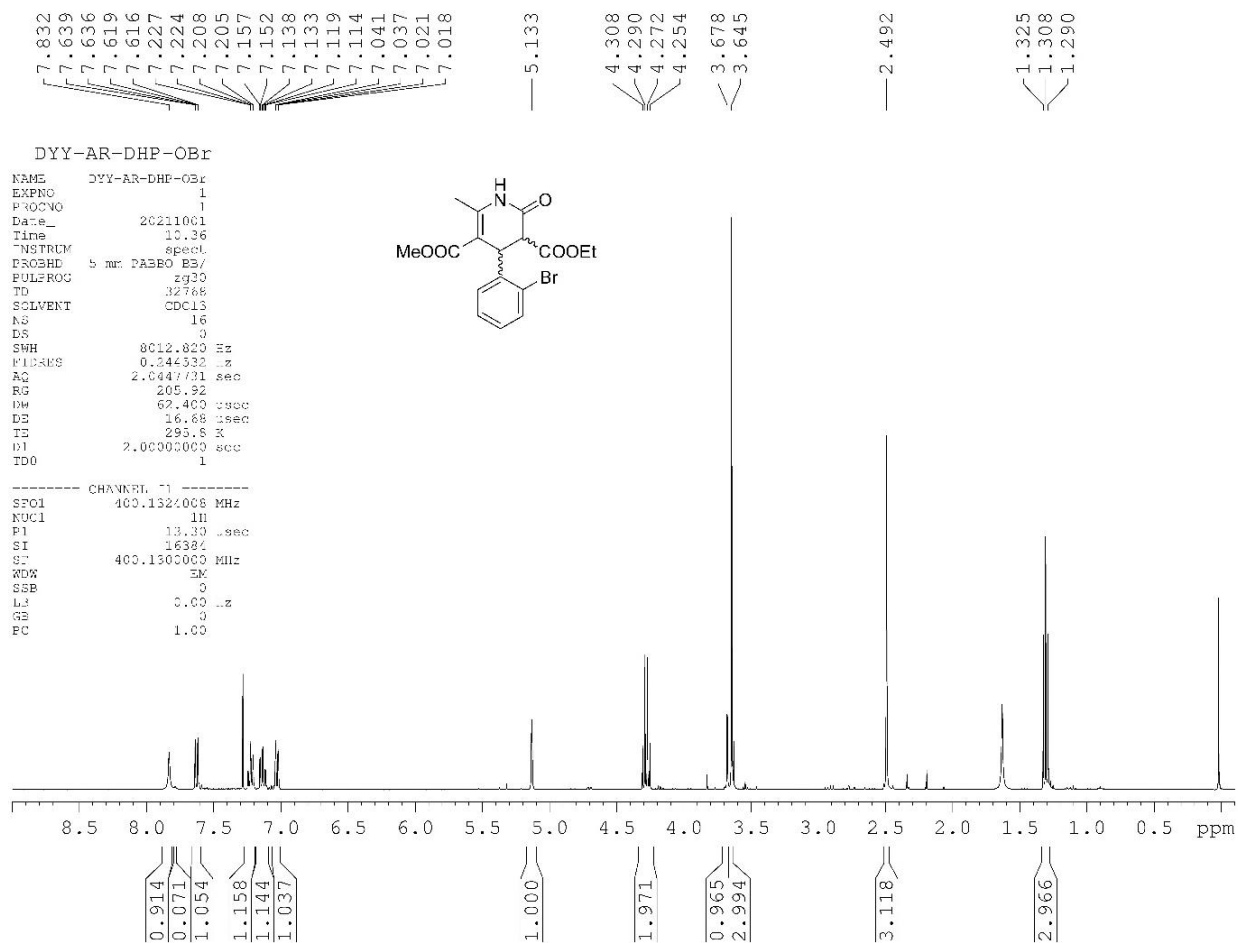

<sup>13</sup>C NMR of compound **51** (CDCl<sub>3</sub>)

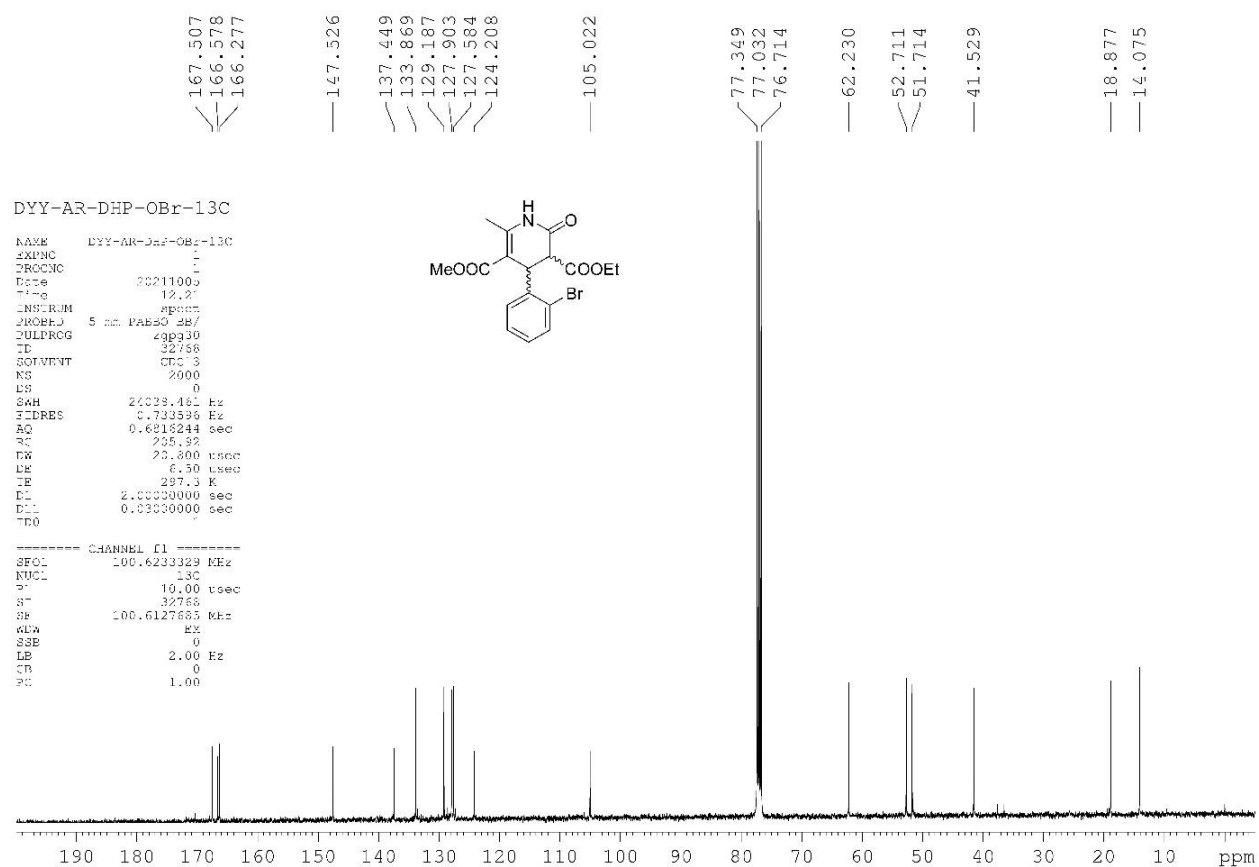

<sup>1</sup>H NMR of compound **5m** (CDCl<sub>3</sub>)

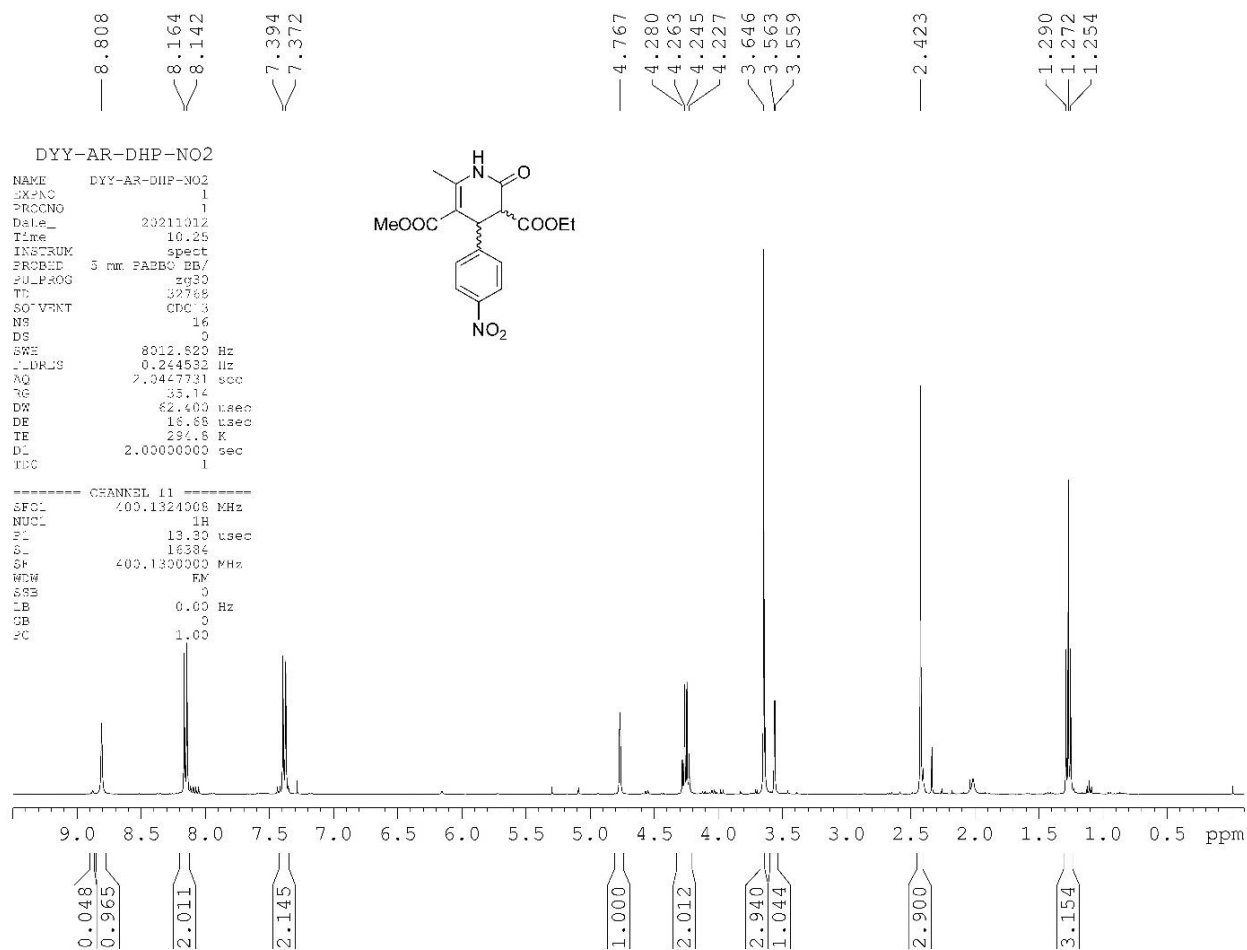

<sup>13</sup>C NMR of compound **5m** (CDCl<sub>3</sub>)

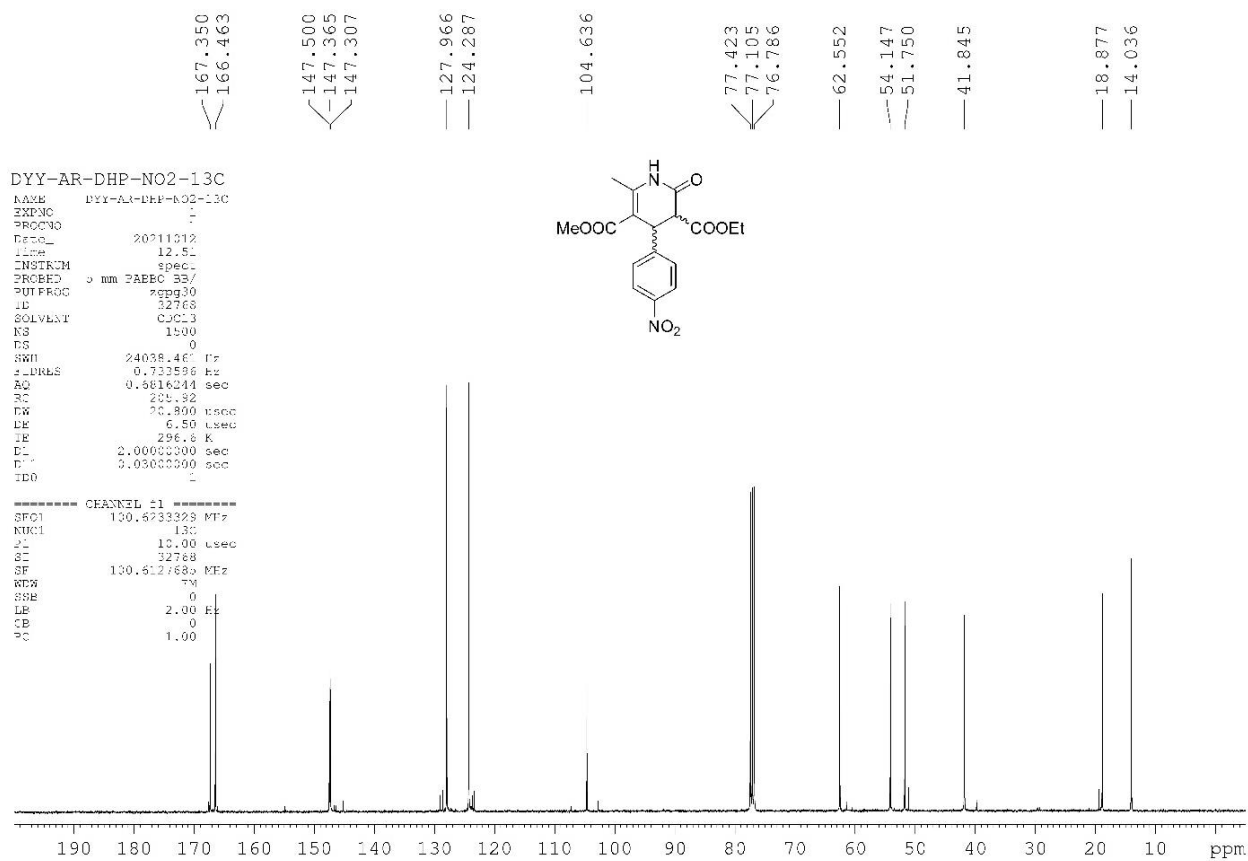

<sup>1</sup>H NMR of compound **5n** (CDCl<sub>3</sub>)

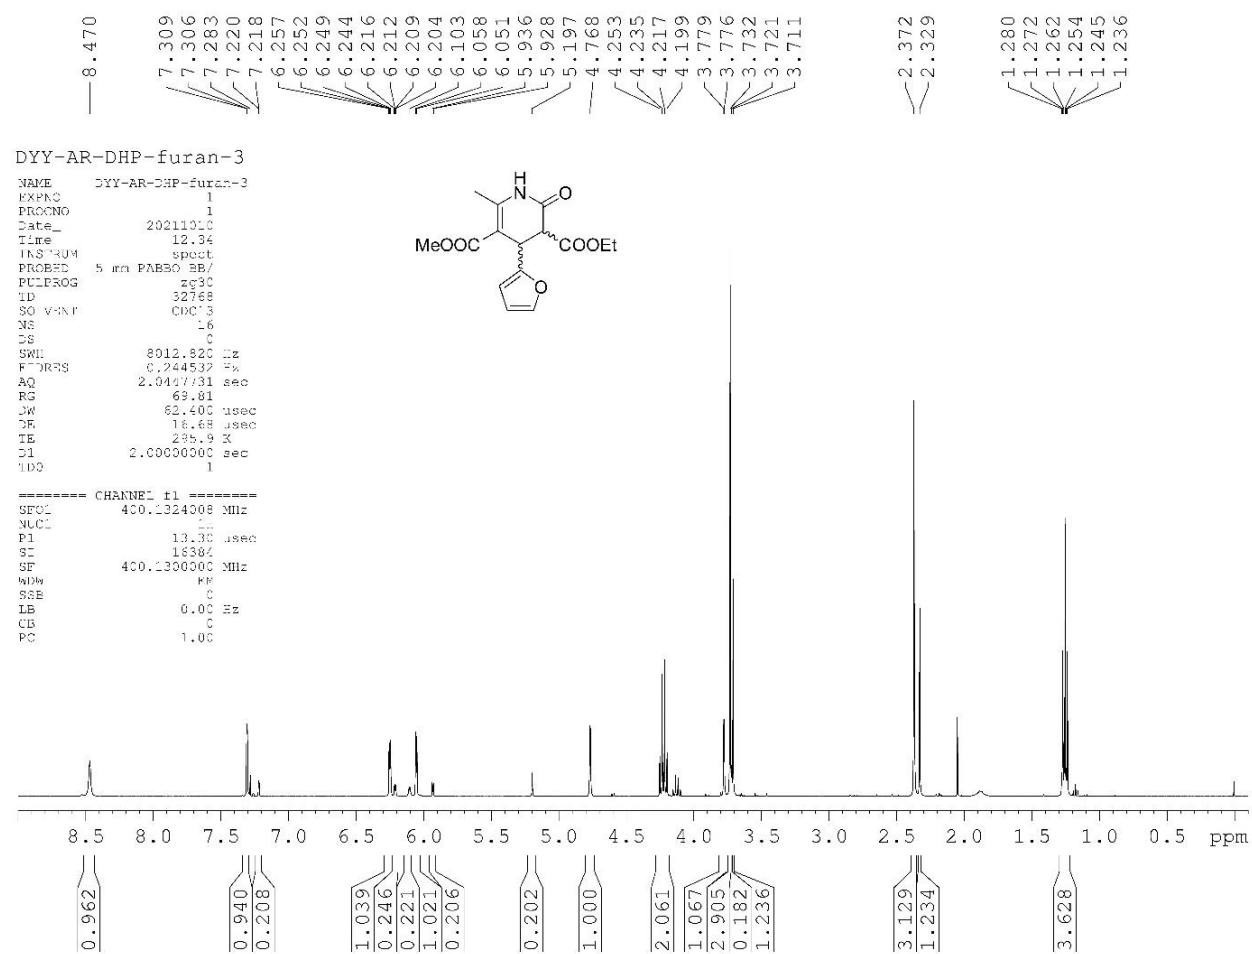

<sup>13</sup>C NMR of compound **5n** (CDCl<sub>3</sub>)

167.906  
167.395  
166.843  
166.616  
158.492  
152.492  
147.221  
145.659  
142.364  
141.023

110.251  
110.016  
106.137  
104.297  
103.628  
100.364

77.389  
77.071  
76.753

62.215  
60.426  
51.642  
51.356  
51.142

36.011  
33.222

19.357  
18.905  
14.179  
14.016

DYY-AR-DHP-furan-3-13C

```

NAME      DYY-AR-DHP-furan-3-13C
EXPNO     1
PROCNO    1
Date_     20210112
Time      11.39
INSTRUM   spect
PROBHD    5 mm PABBO BB/
PULPROG   zgpg30
TE        32768
SOLVENT   CDCl3
NS        400
DS        4
SWH        24038.461 Hz
FIDRES     0.733596 Hz
AQ         0.6915244 sec
RG         200.92
FR         20.800 MHz
DS         6.50 MHz
TE        296.2 K
D1         2.00000000 sec
D11        0.03000000 sec
TD         1
  
```

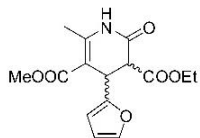

```

----- CHANNEL f1 -----
SF01     100.6283829 MHz
NUC1      13C
P1        10.00 MHz
S1        32768
SF        100.6127685 MHz
WDW        EM
SSB        0
LB         2.00 Hz
GB         0
PC         1.00
  
```

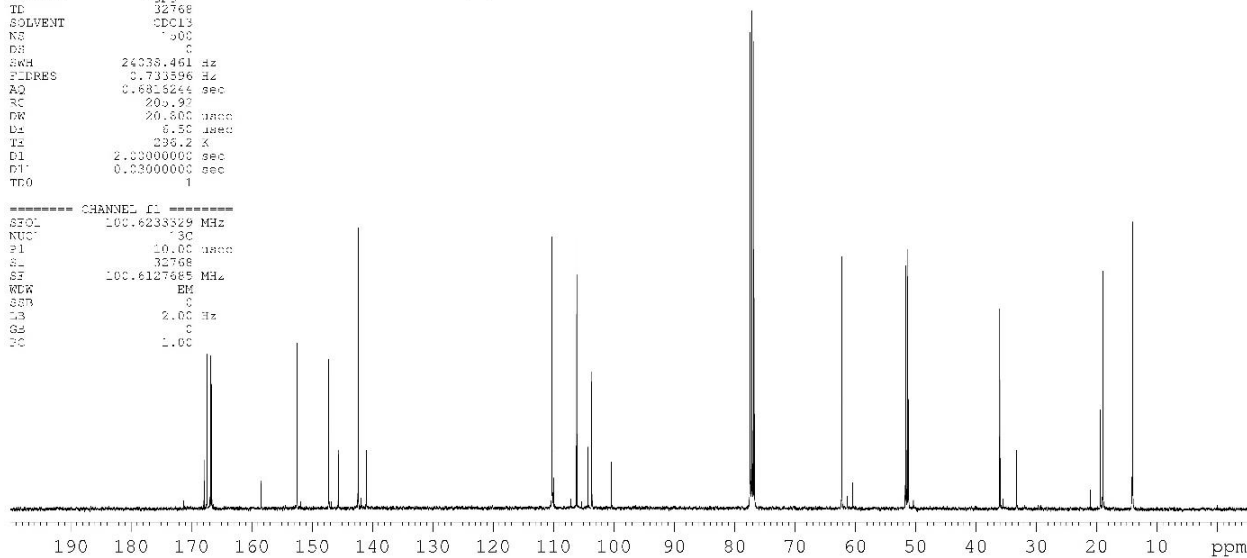

<sup>1</sup>H NMR of compound **5o** (CDCl<sub>3</sub>)

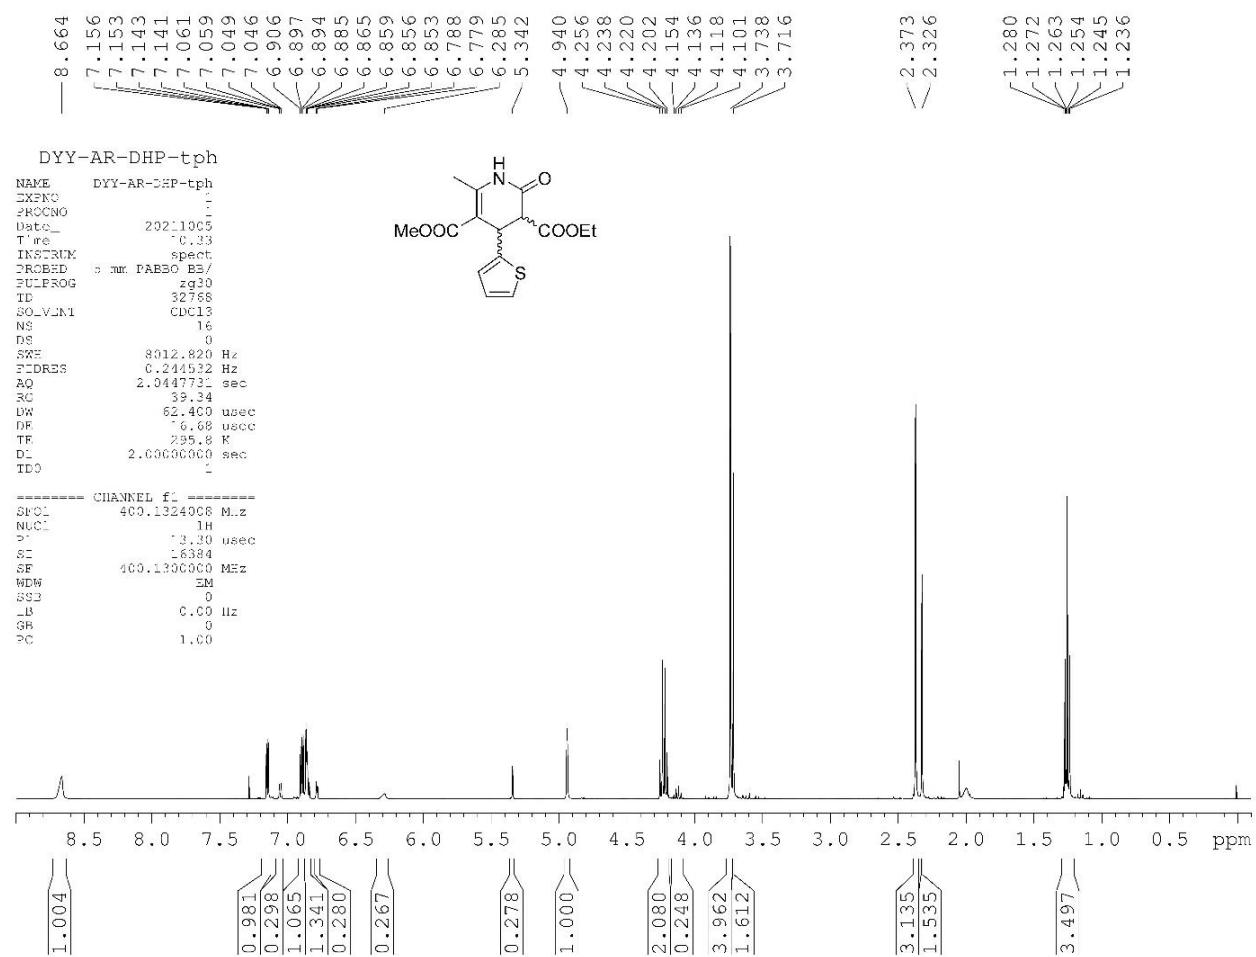



<sup>13</sup>C NMR of compound **5o** (CDCl<sub>3</sub>)

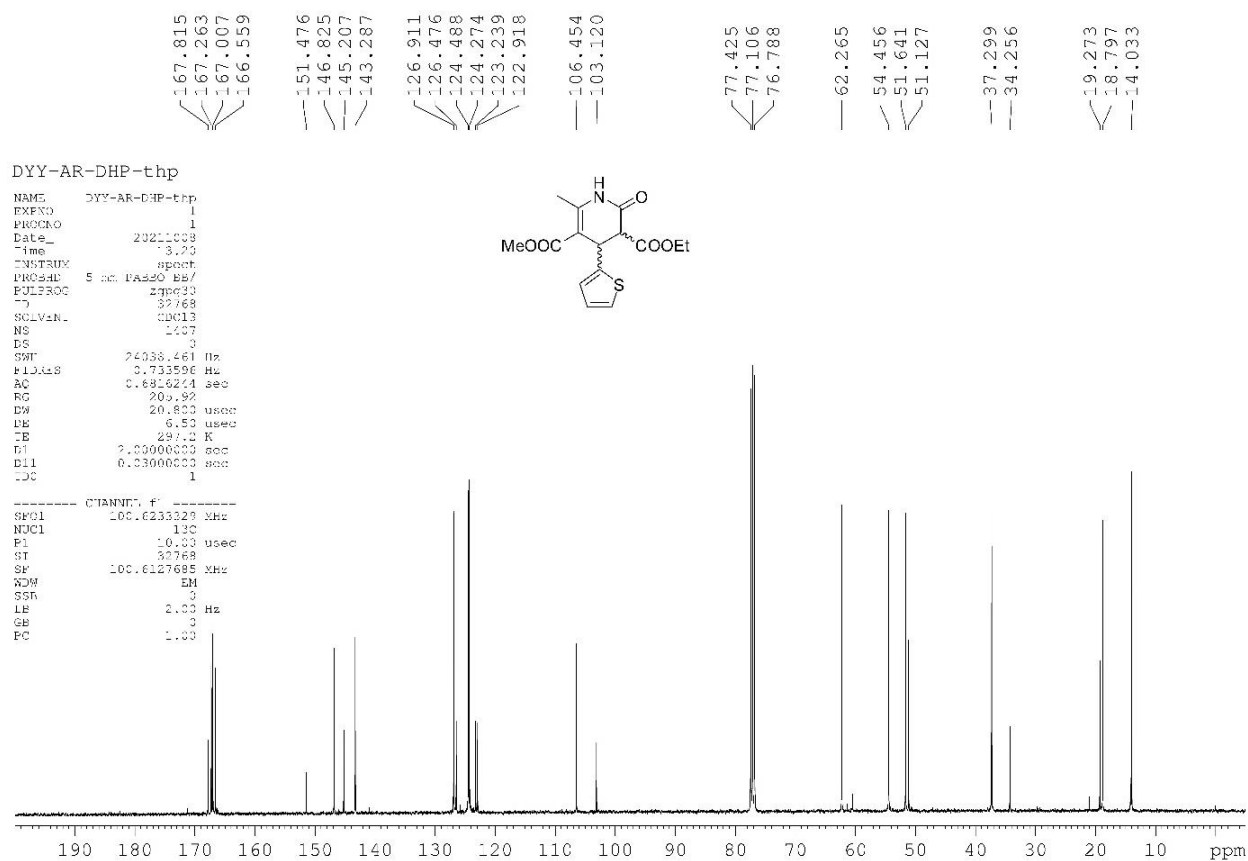

<sup>1</sup>H NMR of compound **3** (CDCl<sub>3</sub>)

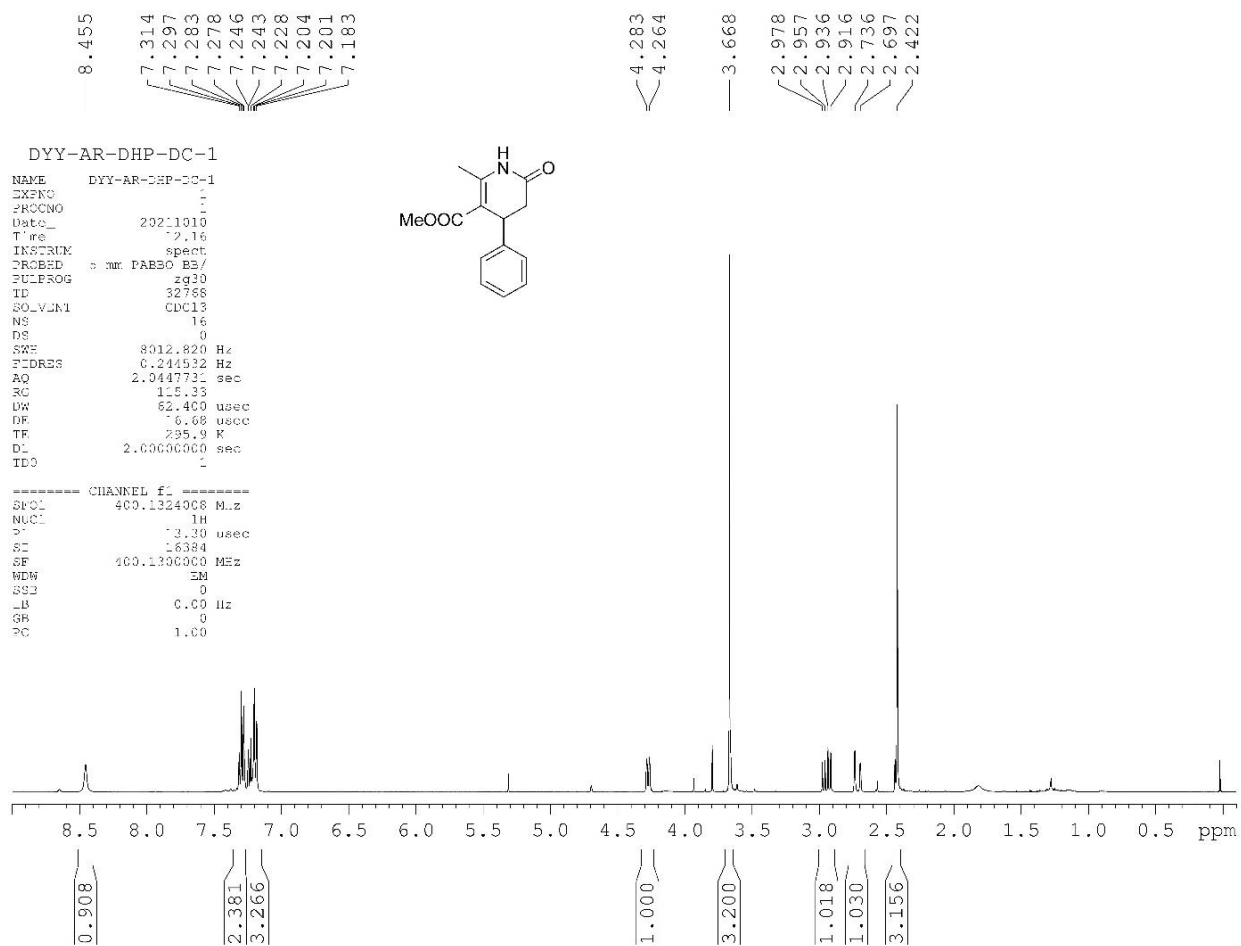

<sup>1</sup>H NMR of *Cis* diastereomer of compound **5a** (DMSO-*d*<sub>6</sub>)

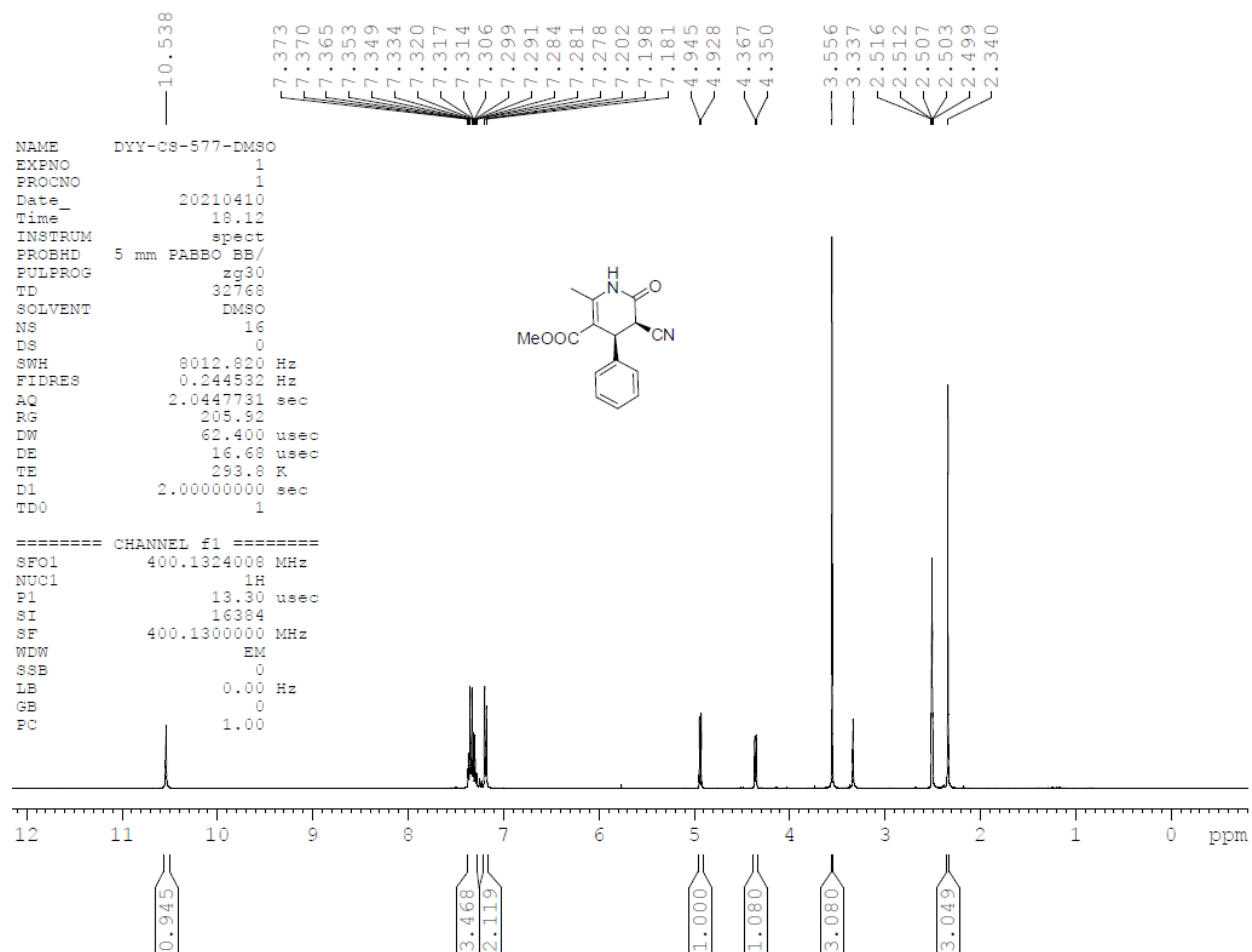

<sup>13</sup>C NMR of *Cis* diastereomer of compound **5a** (DMSO-*d*<sub>6</sub>)

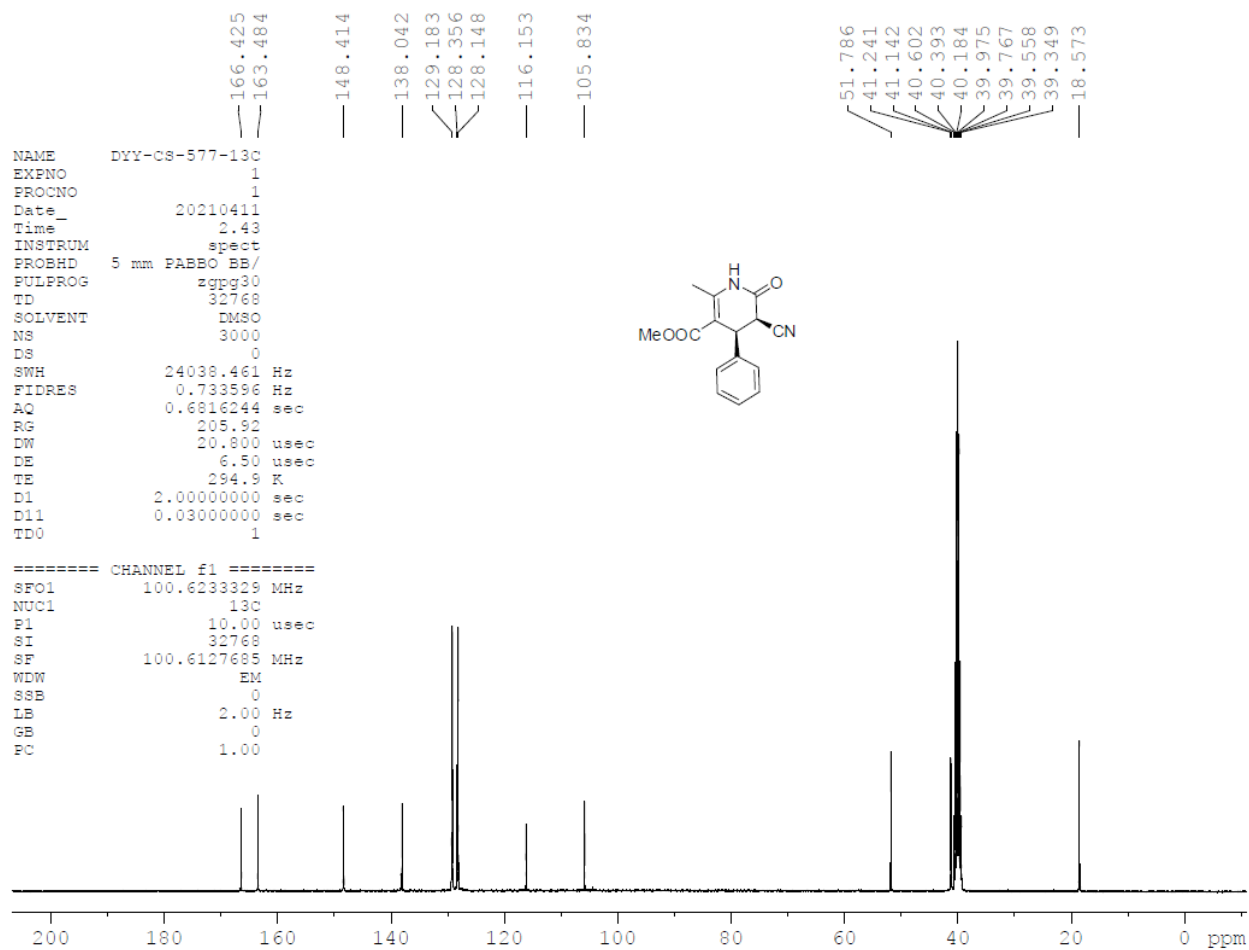

<sup>1</sup>H NMR of compound **8a** (CD<sub>3</sub>OD)

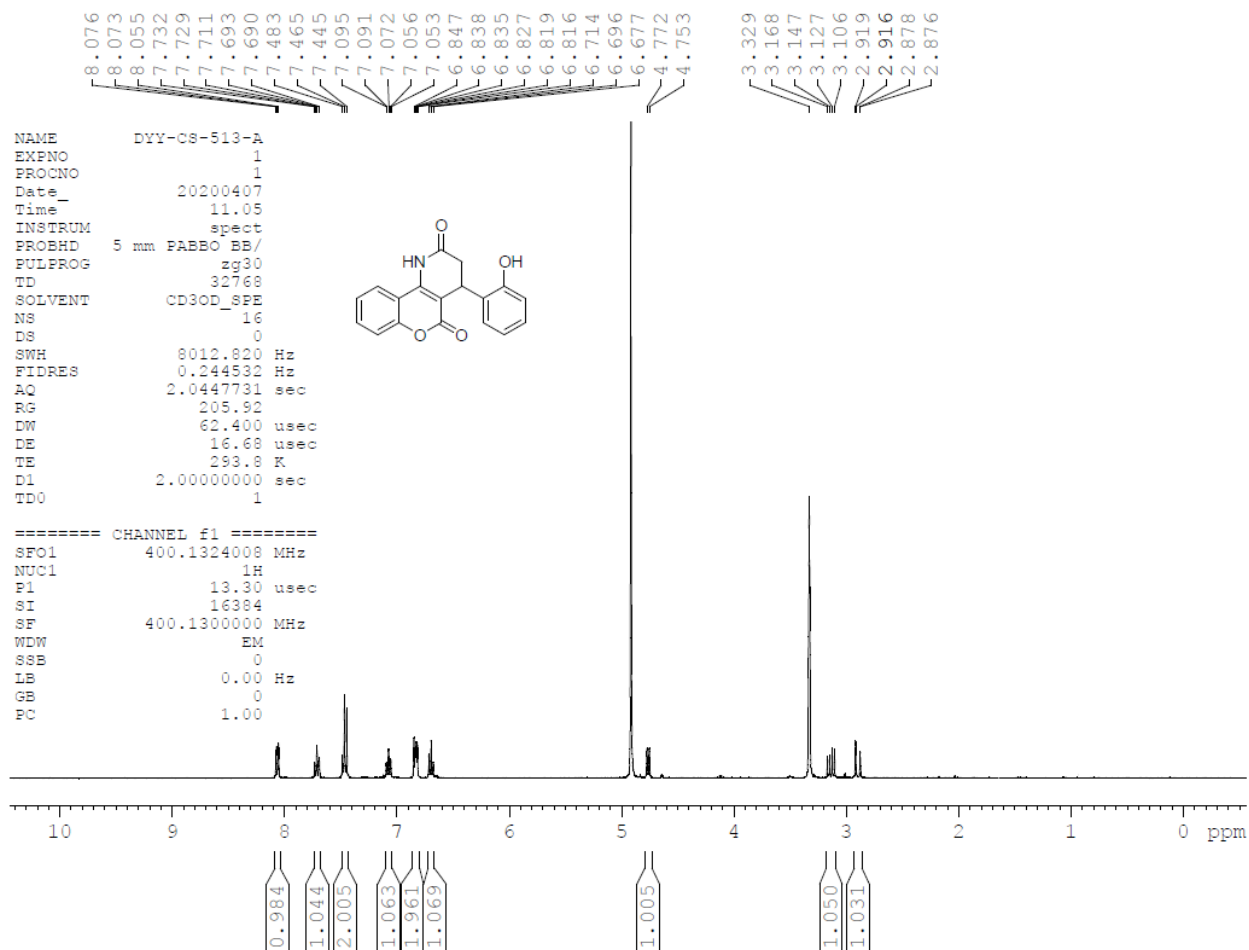

<sup>13</sup>C NMR of compound **8a** (DMSO-*d*<sub>6</sub>)

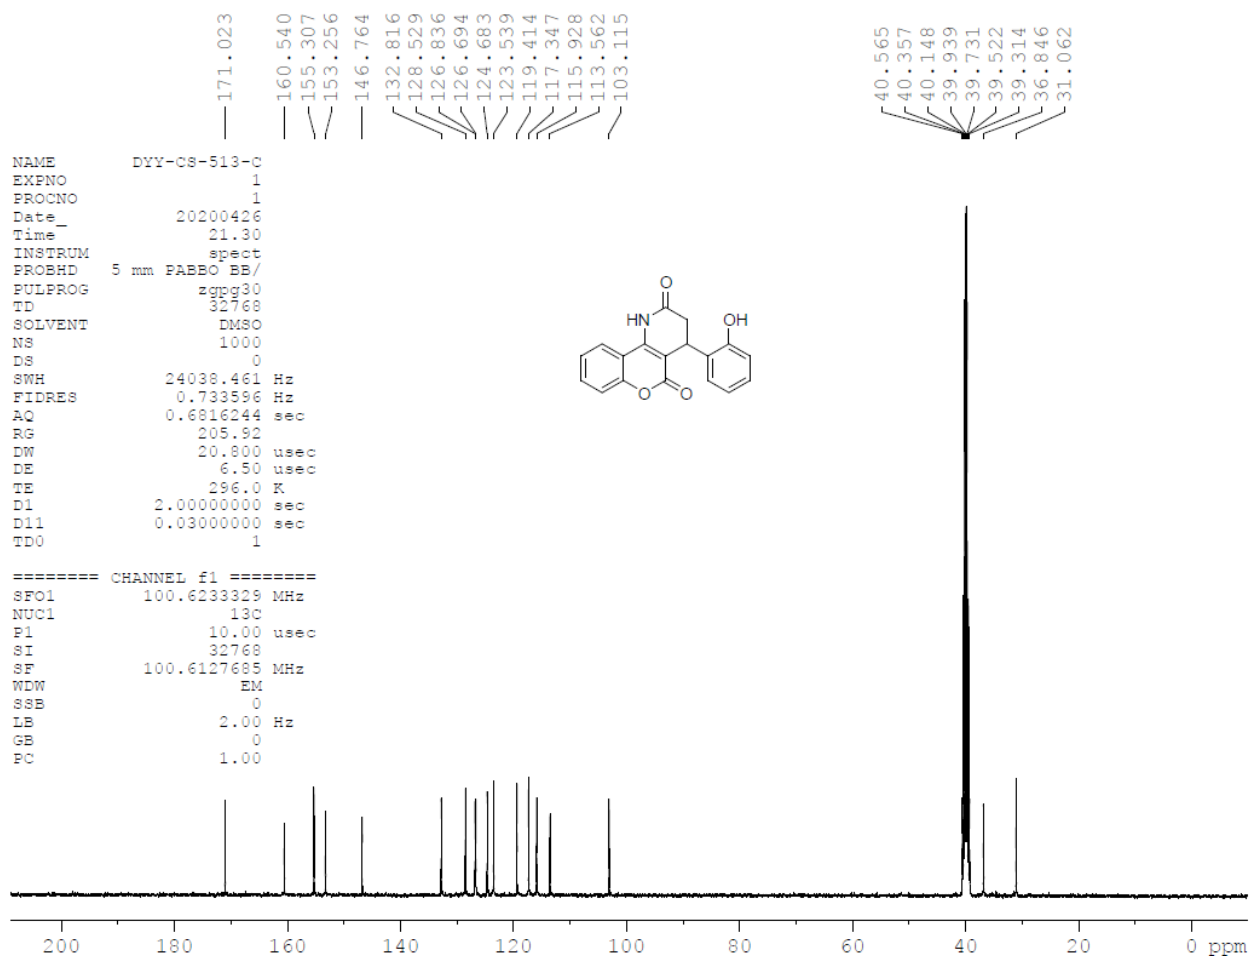

<sup>1</sup>H NMR of compound **8b** (DMSO-*d*<sub>6</sub>)

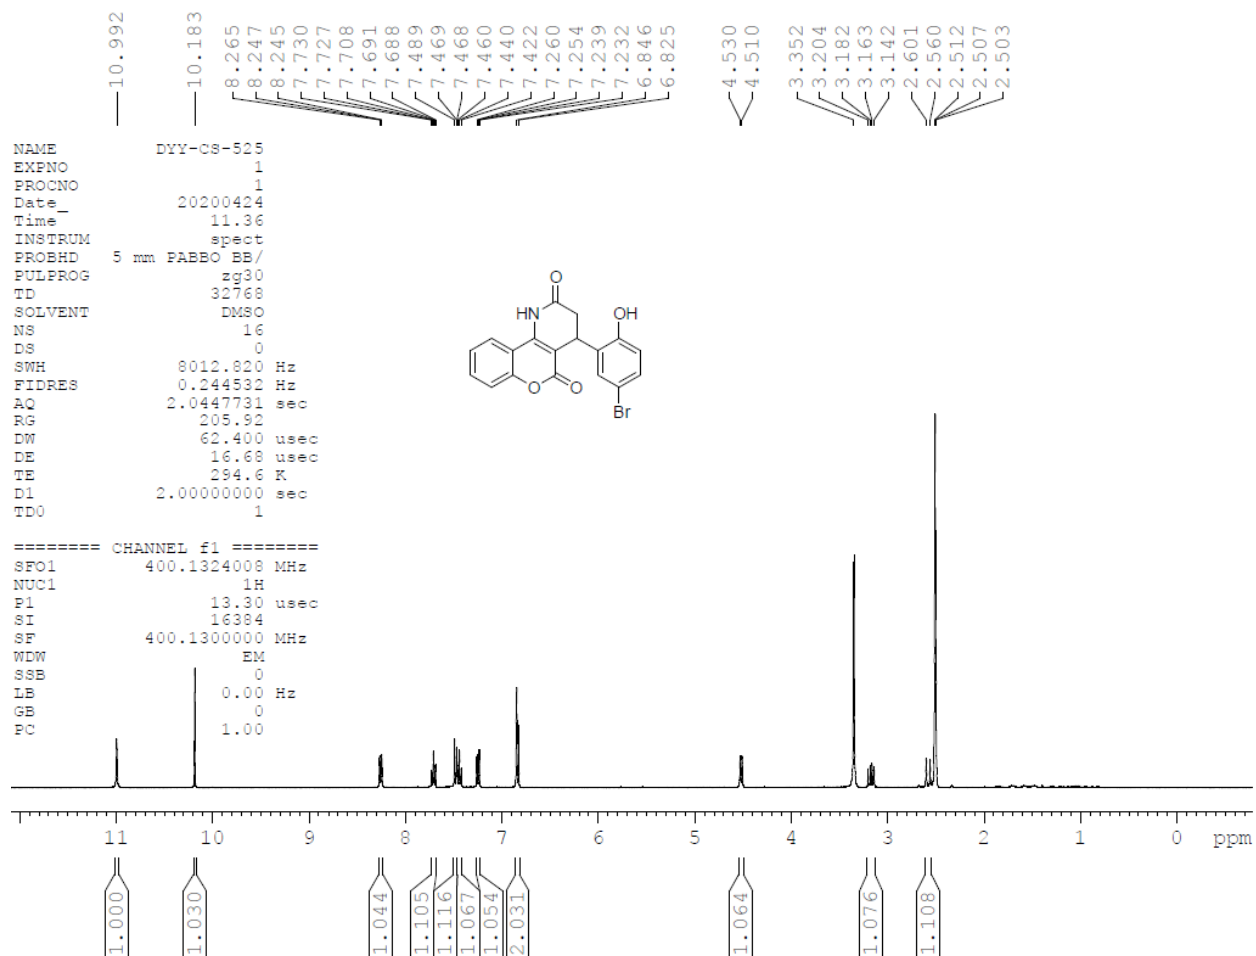

<sup>13</sup>C NMR of compound **8b** (DMSO-*d*<sub>6</sub>)

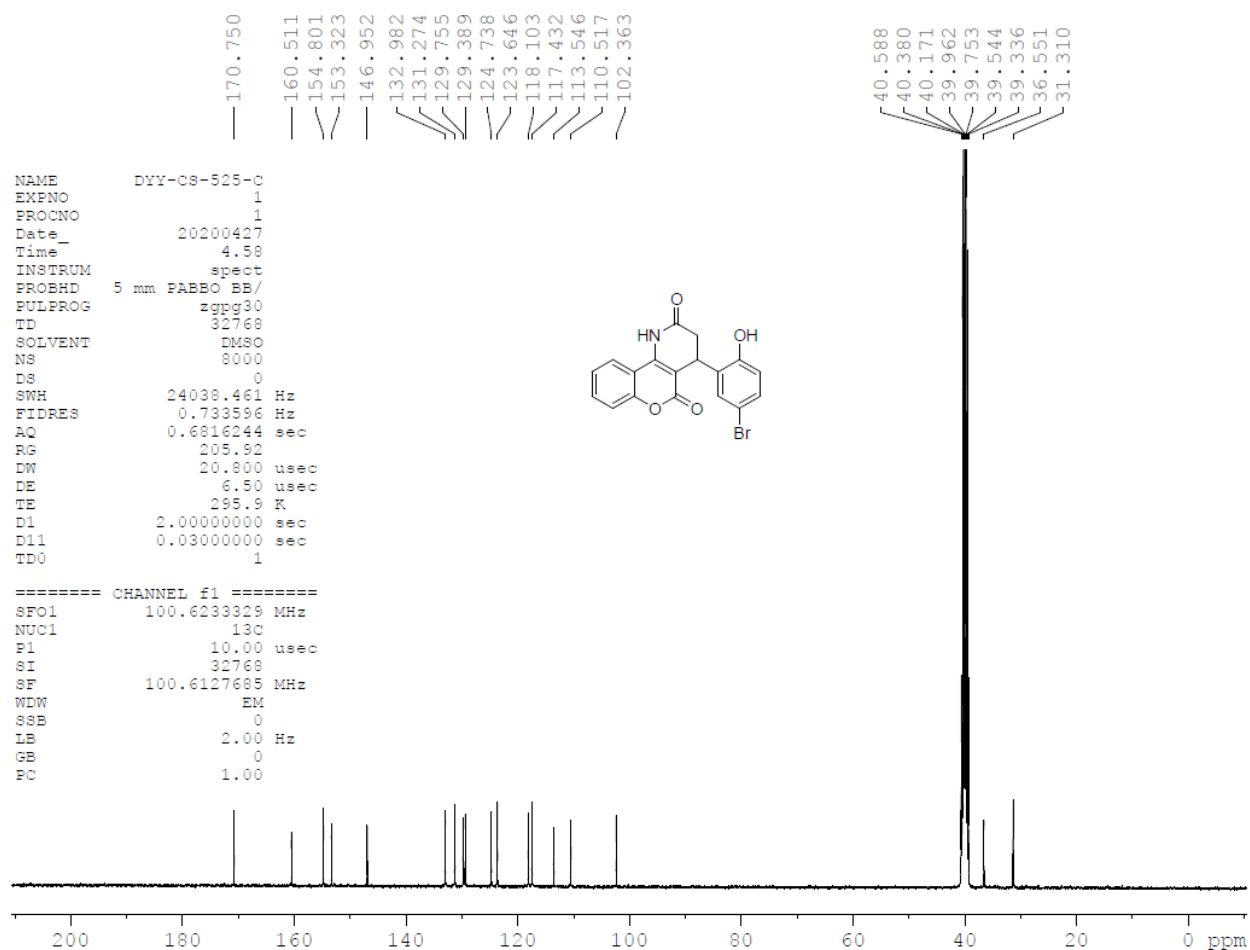



<sup>1</sup>H NMR of compound **8c** (DMSO-*d*<sub>6</sub>)

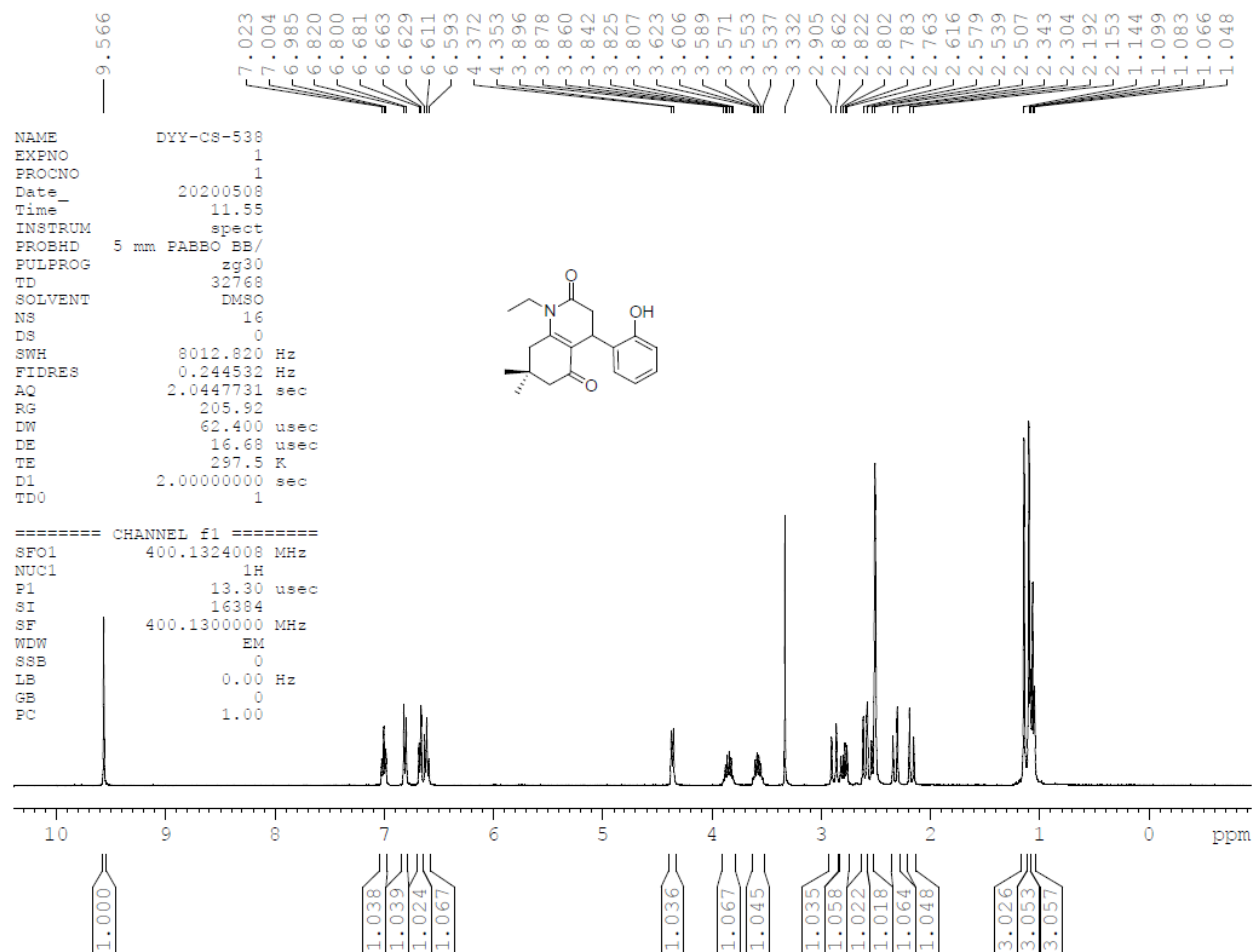

<sup>13</sup>C NMR of compound **8c** (DMSO-*d*<sub>6</sub>)

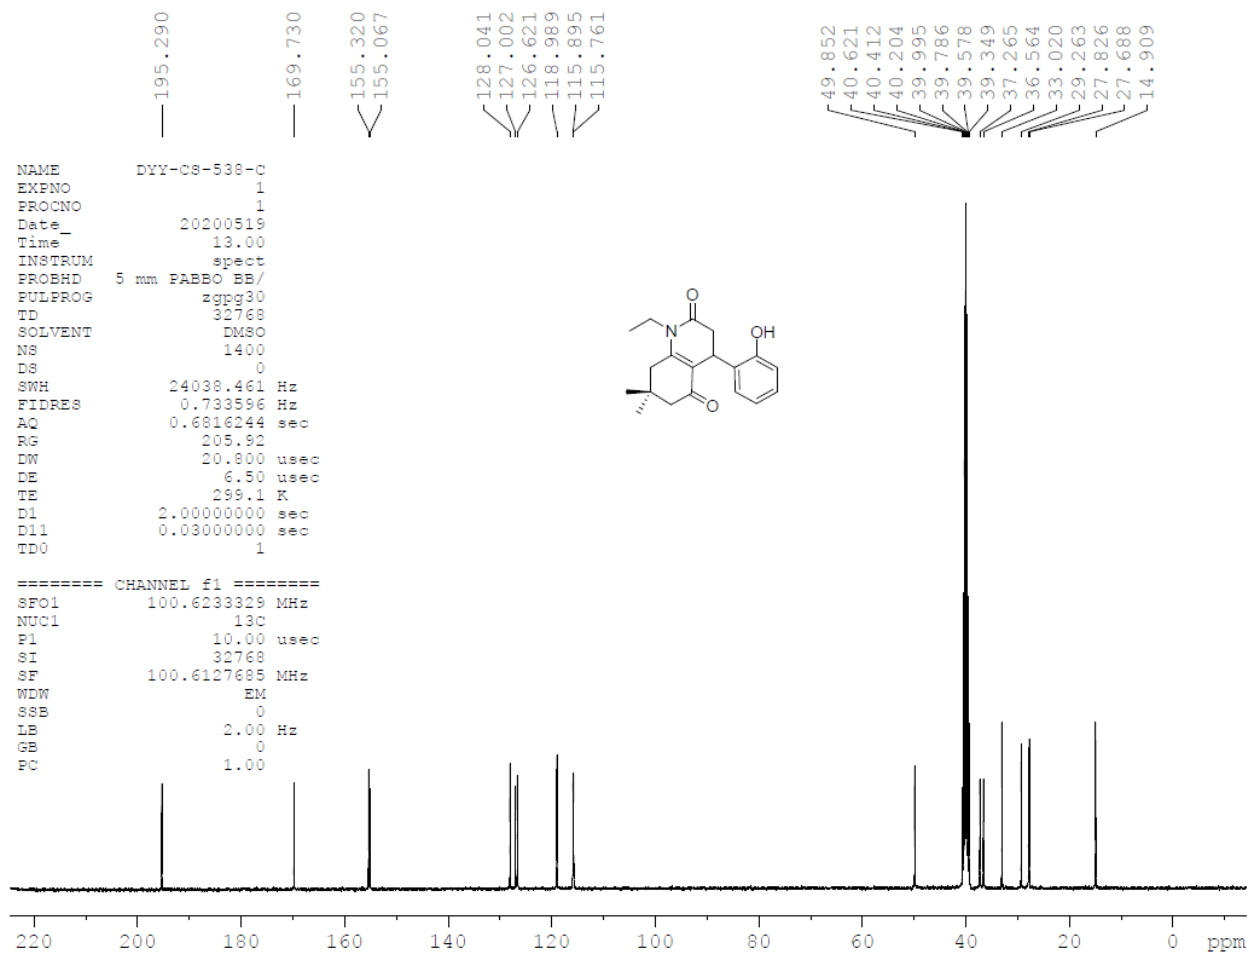

<sup>1</sup>H NMR of compound **8d** (CDCl<sub>3</sub>)

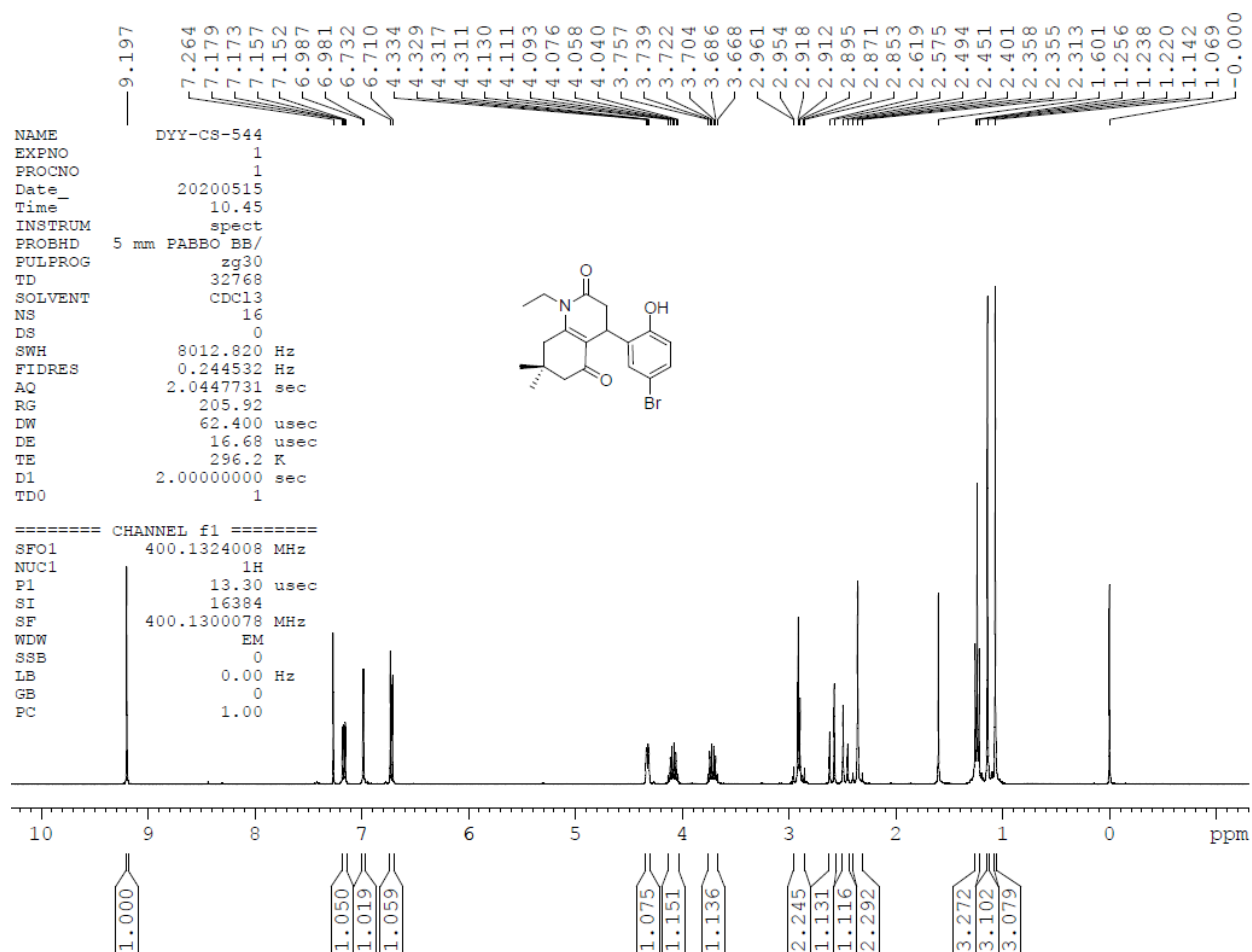

<sup>13</sup>C NMR of compound **8d** (DMSO-*d*<sub>6</sub>)

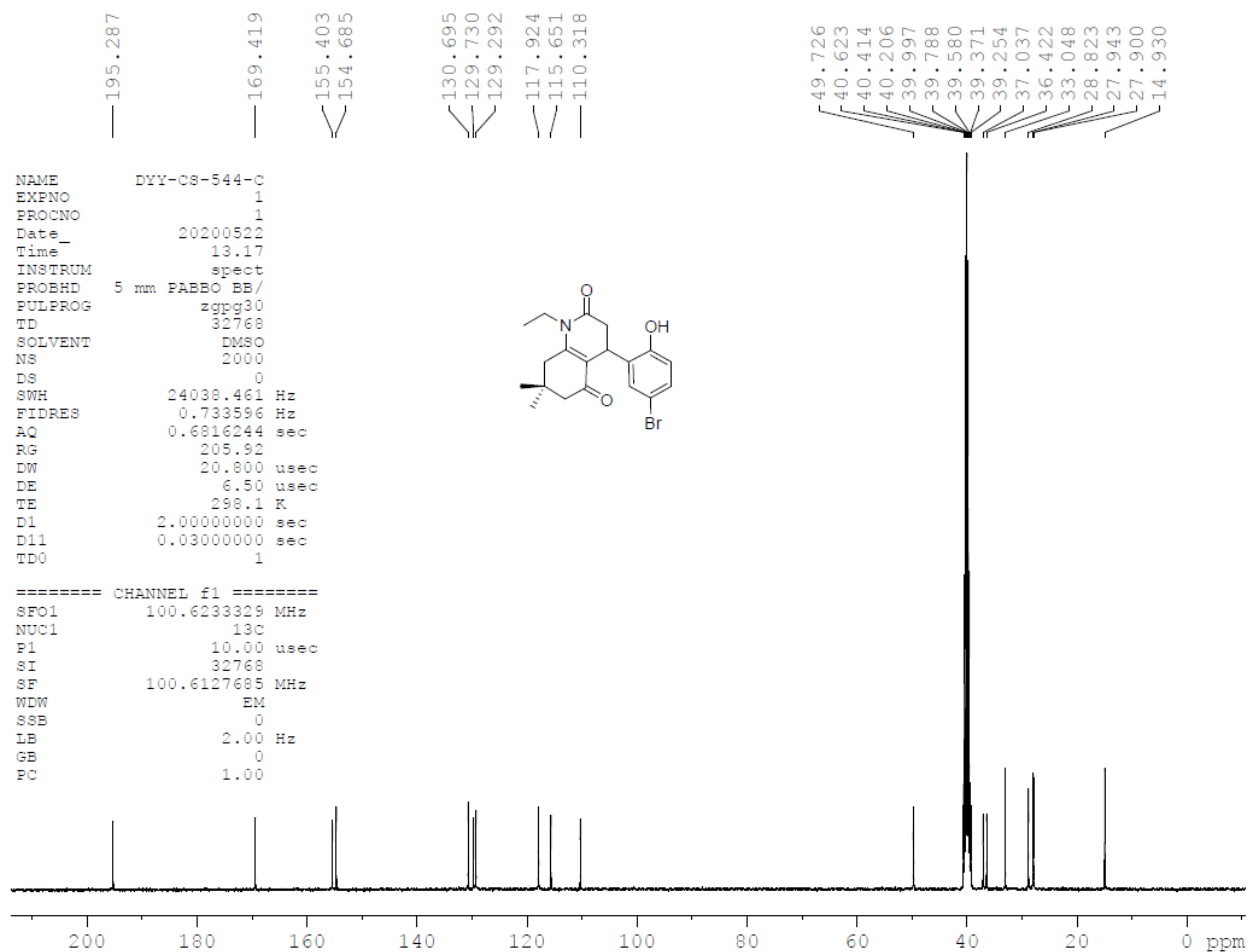

<sup>1</sup>H NMR of compound **8e** (DMSO-*d*<sub>6</sub>)

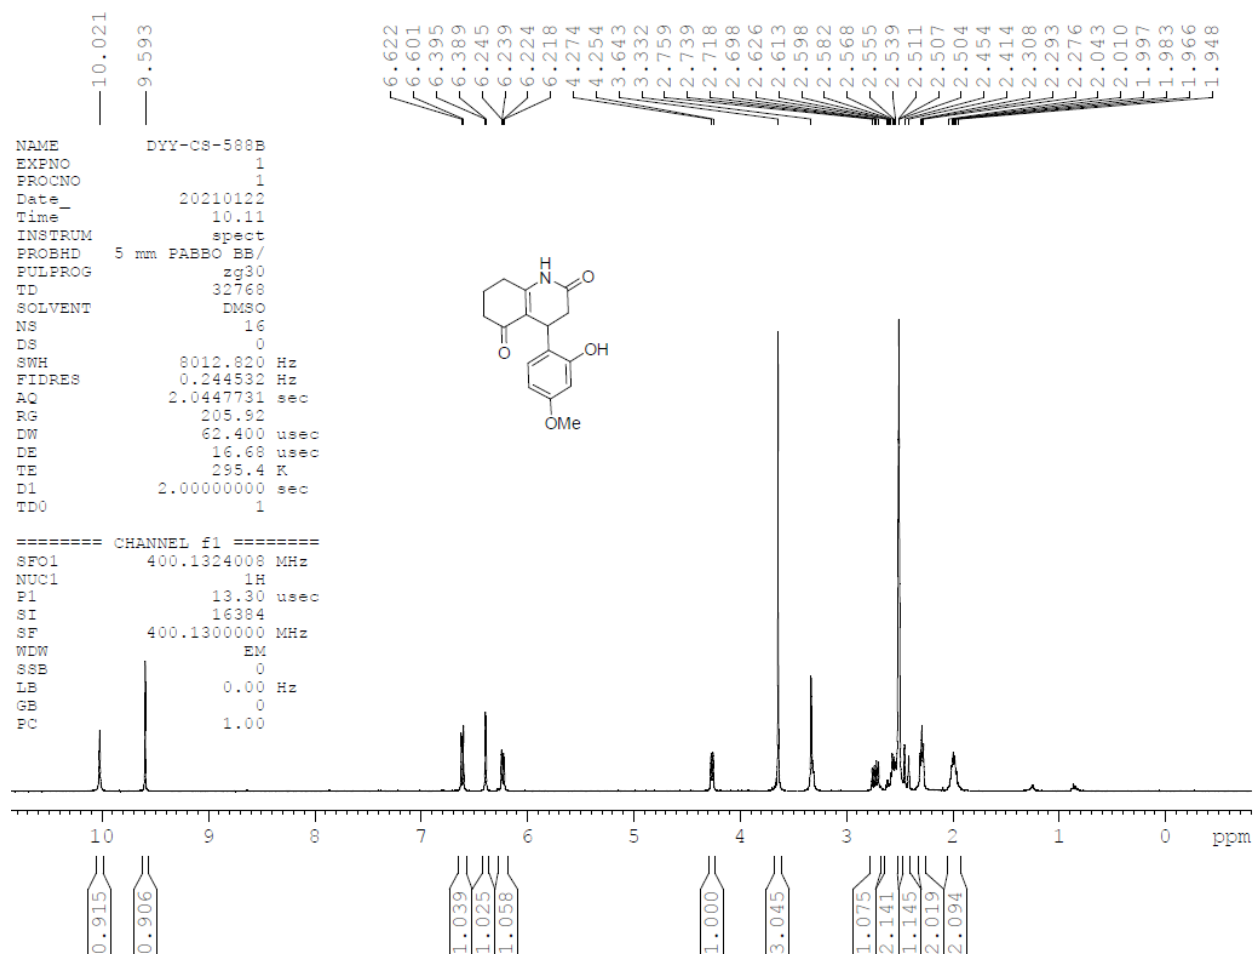

<sup>13</sup>C NMR of compound **8e** (DMSO-*d*<sub>6</sub>)

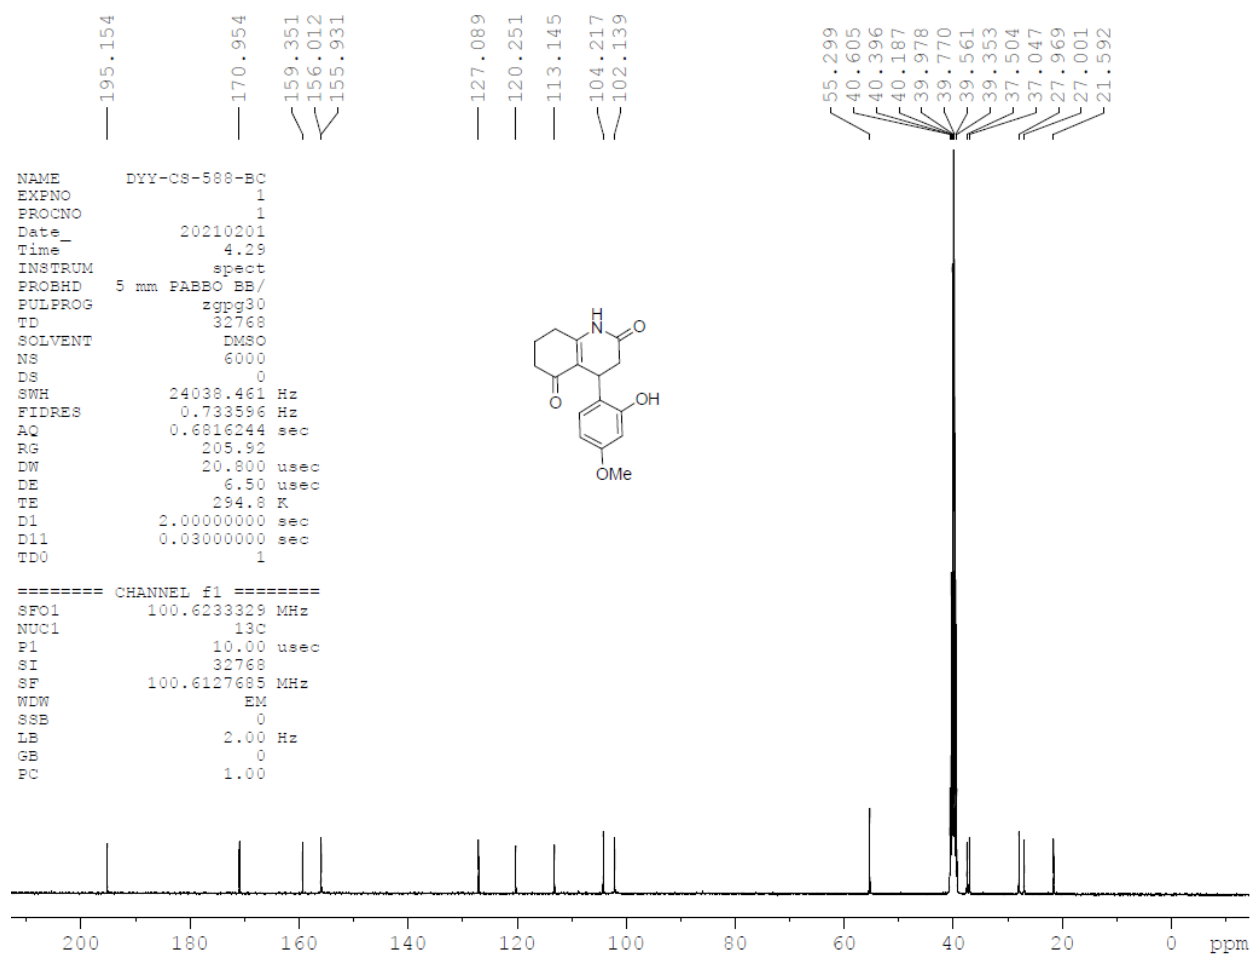

<sup>1</sup>H NMR of compound **9a** (DMSO-*d*<sub>6</sub>)

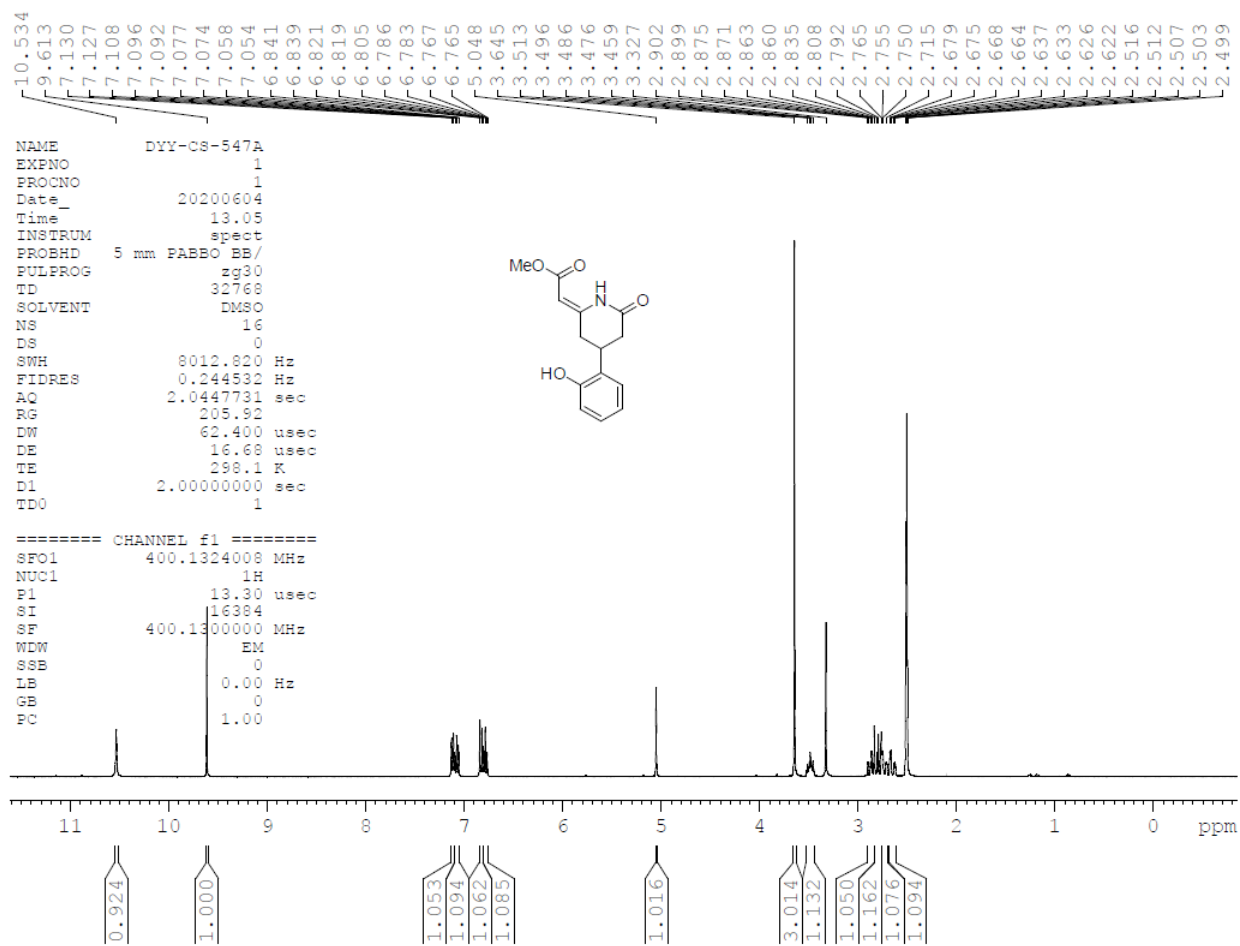

<sup>13</sup>C NMR of compound **9a** (DMSO-*d*<sub>6</sub>)

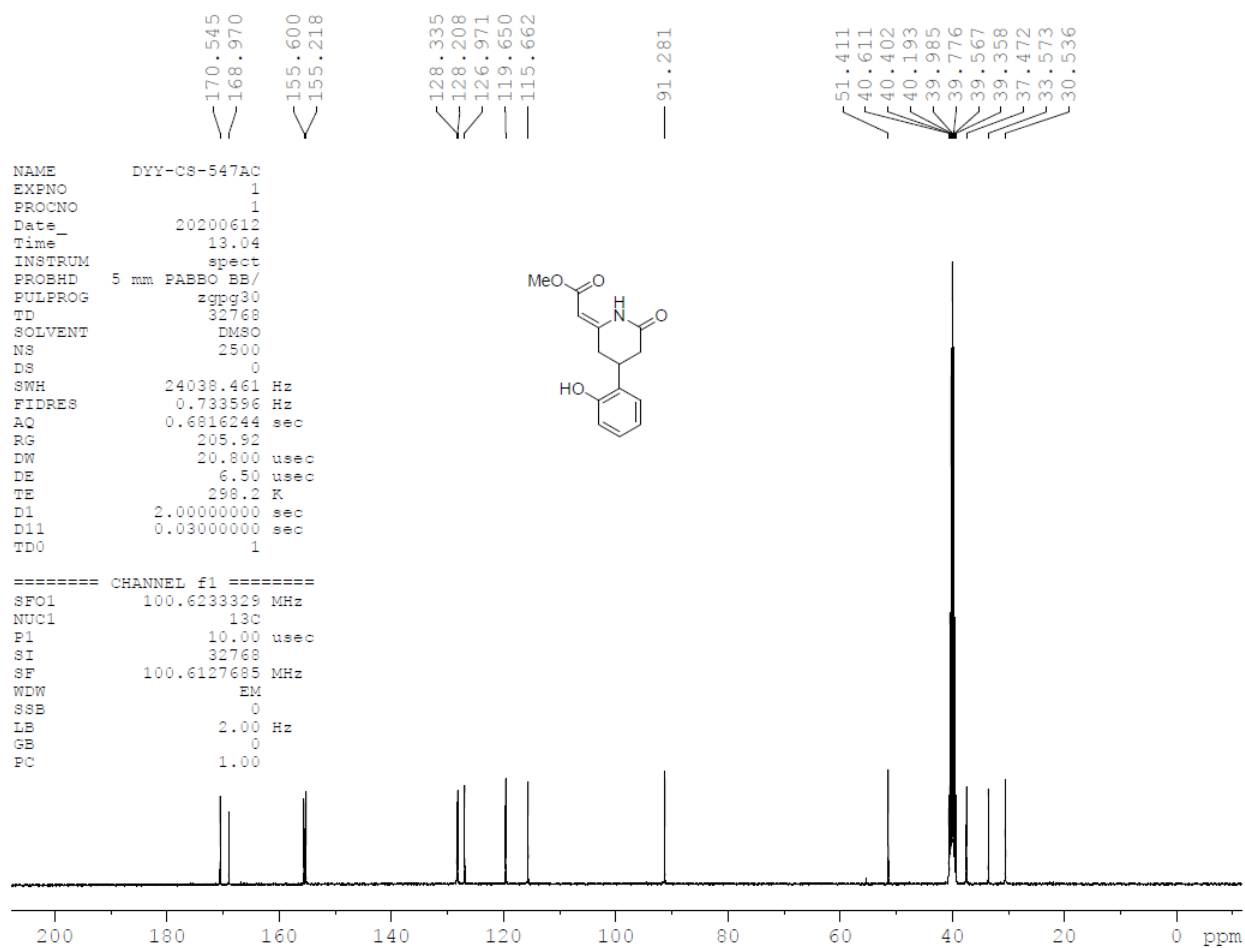



<sup>1</sup>H NMR of compound **9b** (CDCl<sub>3</sub>)

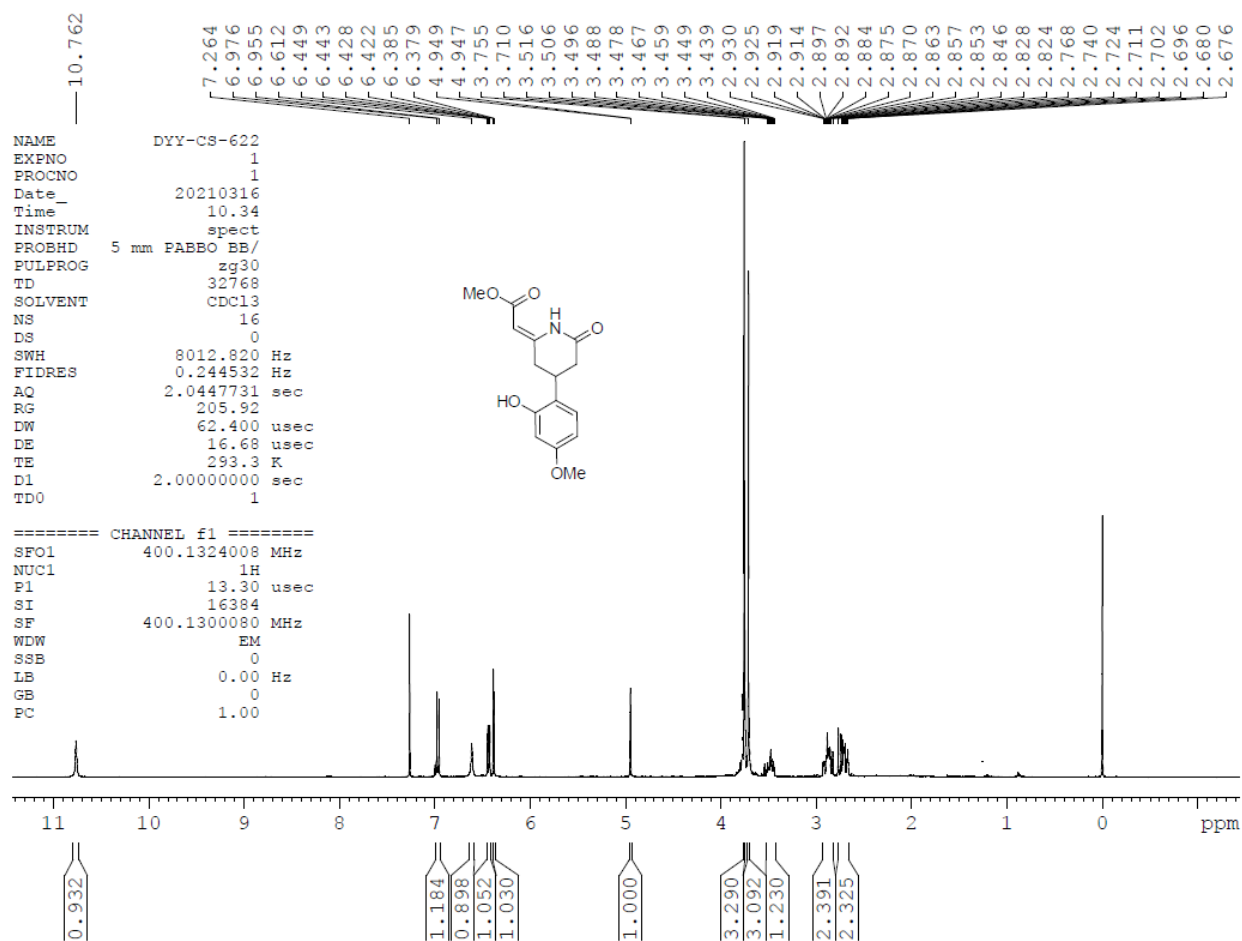

<sup>13</sup>C NMR of compound **9b** (CDCl<sub>3</sub>)

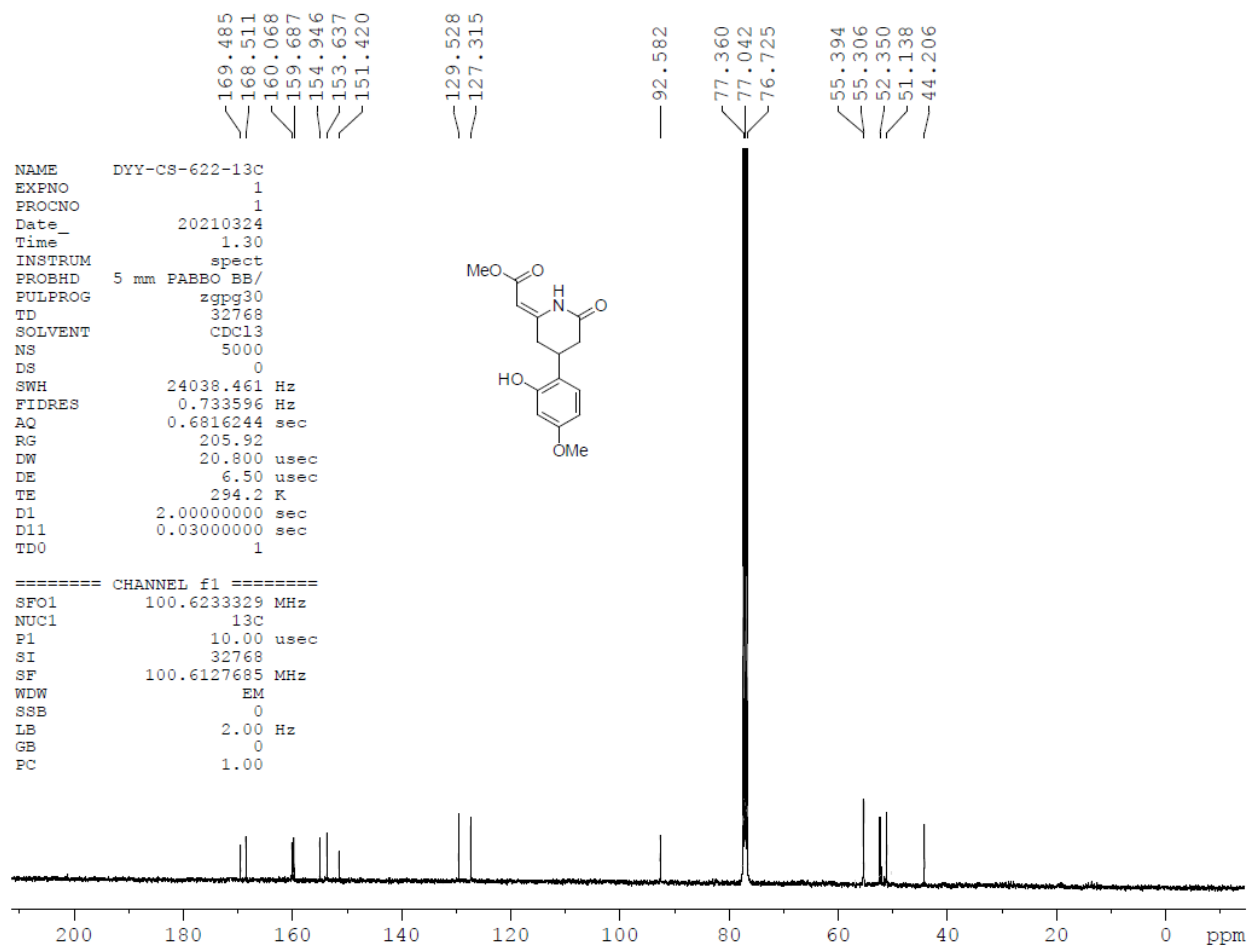

<sup>1</sup>H NMR of compound **9c** (CDCl<sub>3</sub>)

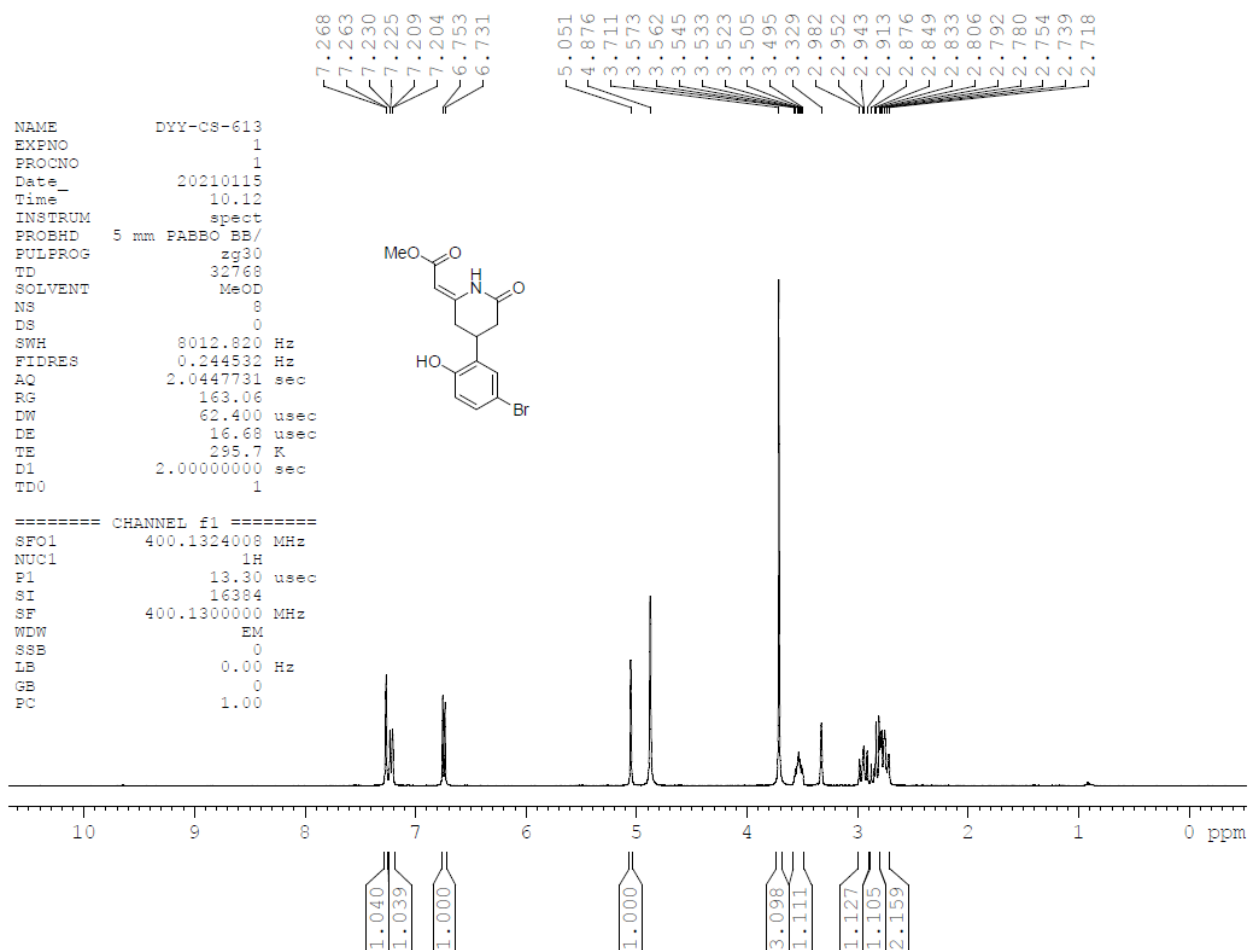

<sup>13</sup>C NMR of compound **9c** (CDCl<sub>3</sub>)

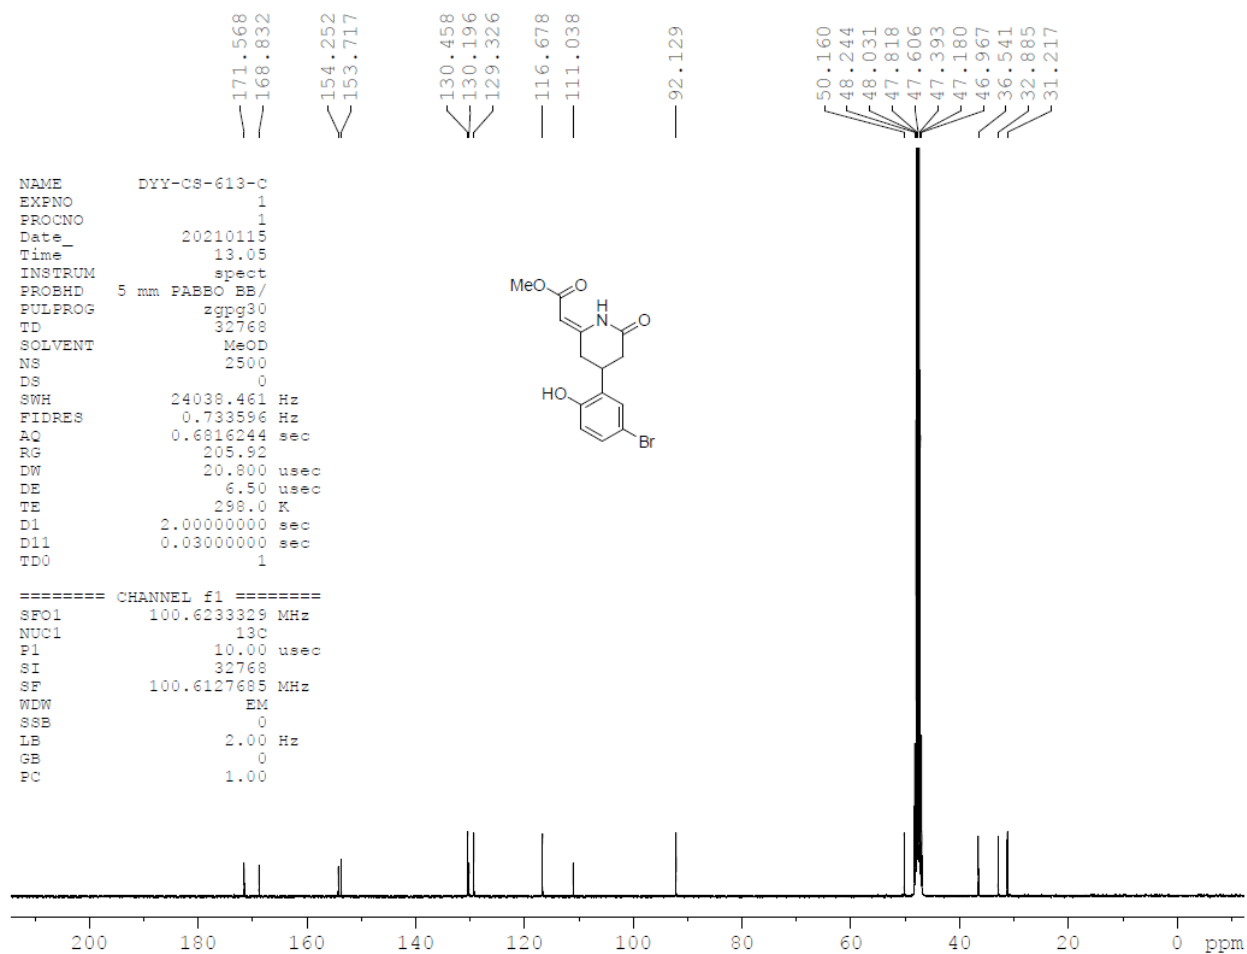

<sup>1</sup>H NMR of compound **9d** (CDCl<sub>3</sub>)

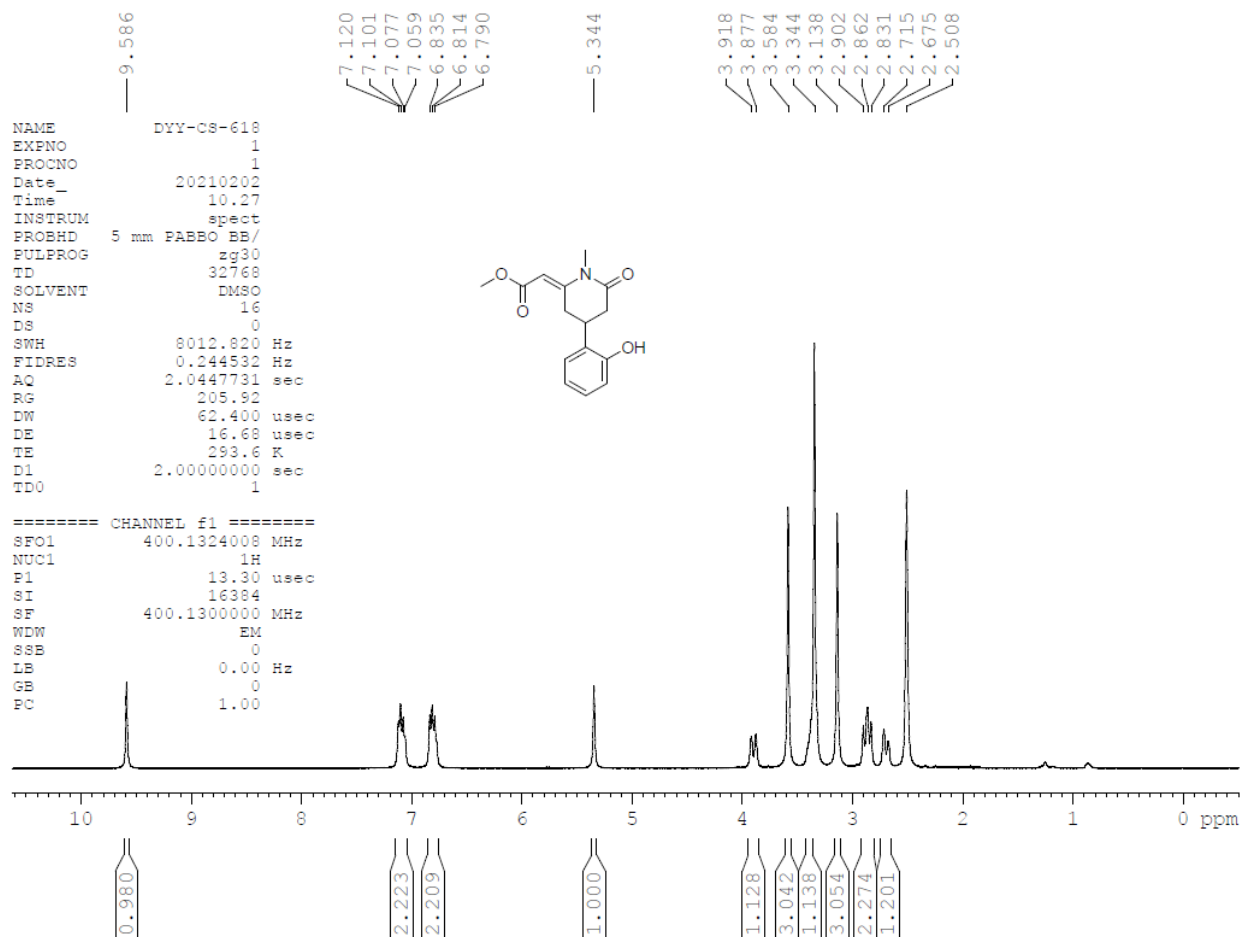

<sup>13</sup>C NMR of compound **9d** (DMSO-*d*<sub>6</sub>)

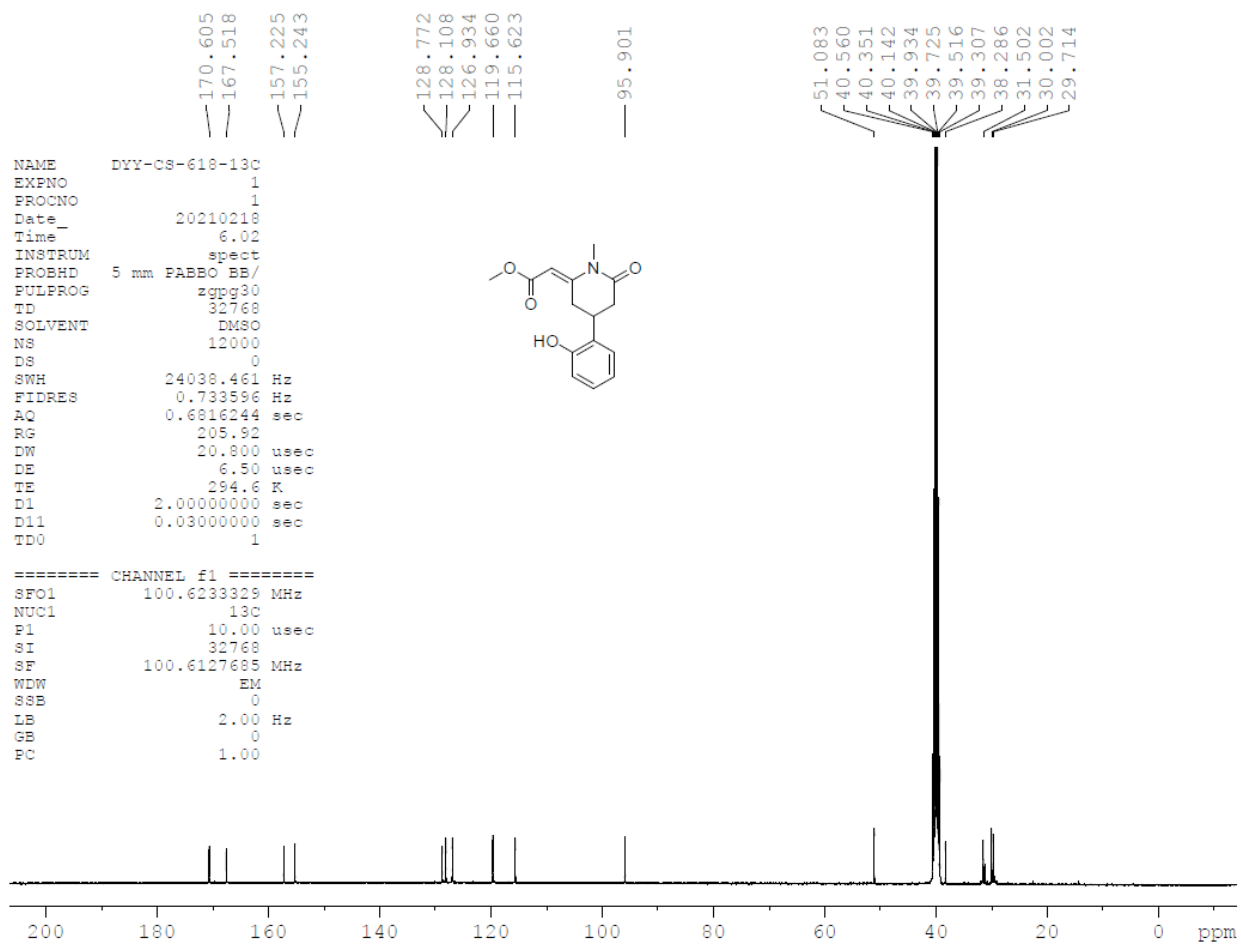

<sup>1</sup>H NMR of compound **9e** (CDCl<sub>3</sub>)

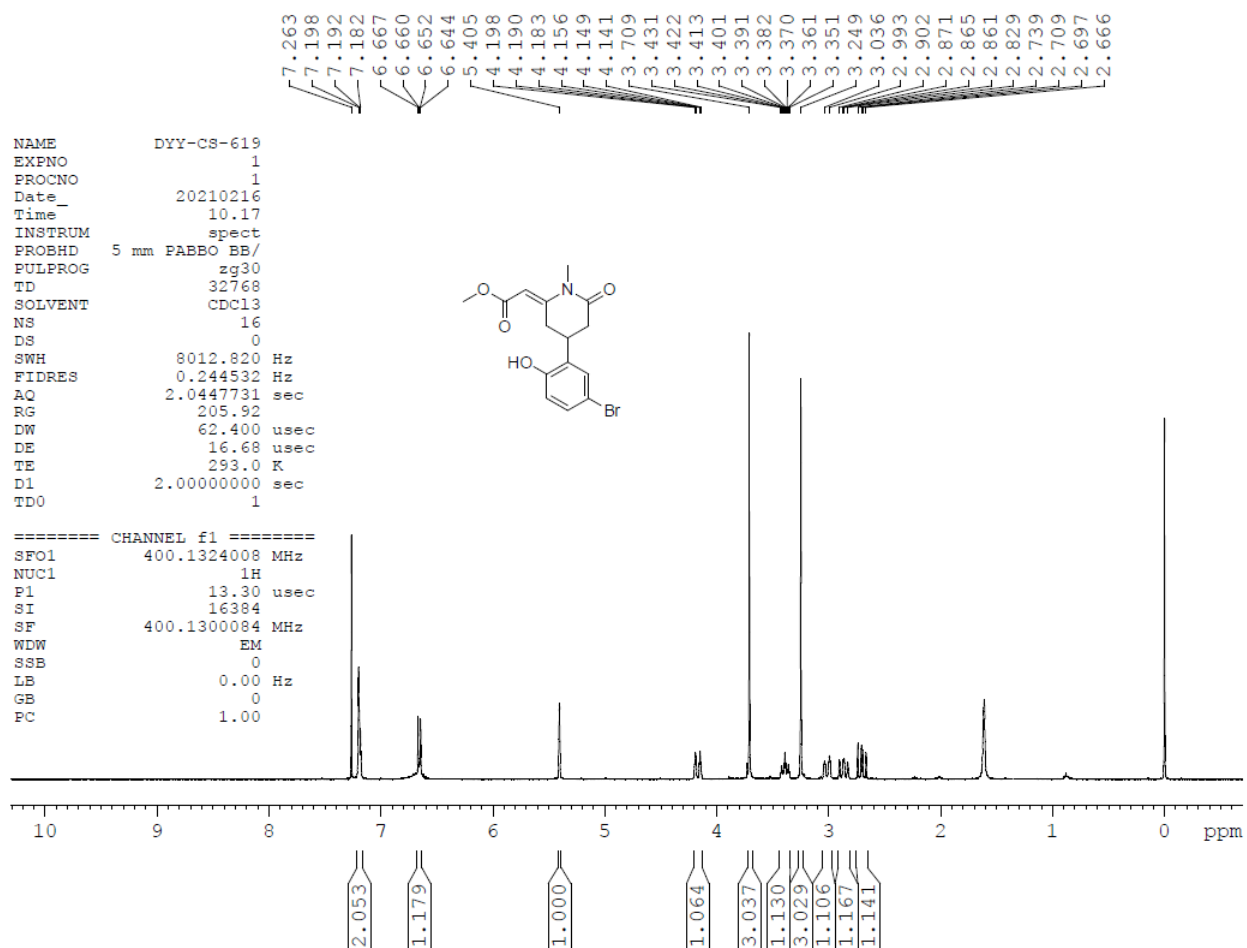

<sup>13</sup>C NMR of compound **9e** (CDCl<sub>3</sub>)

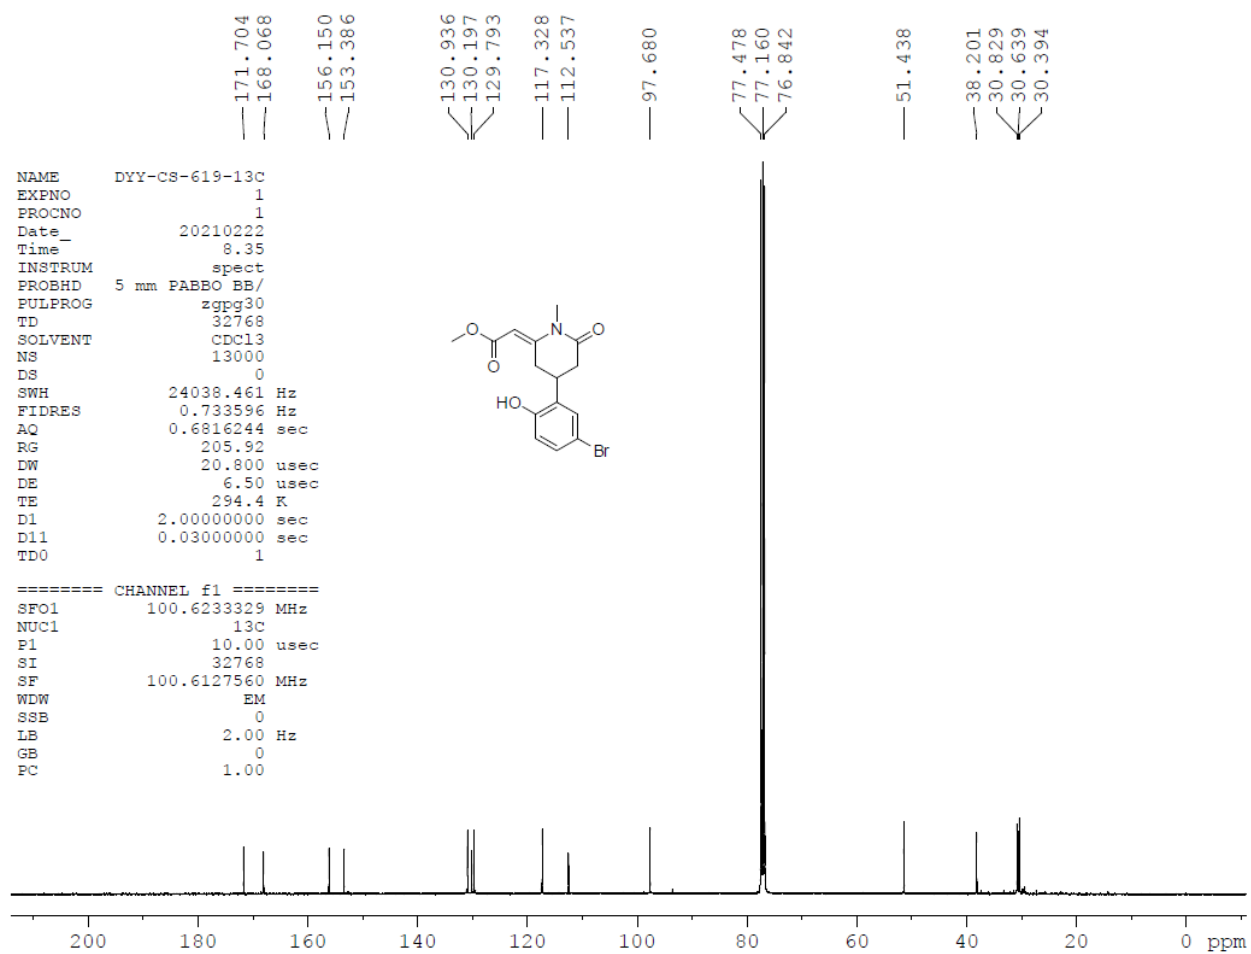



<sup>1</sup>H NMR of compound **14** (CDCl<sub>3</sub>)

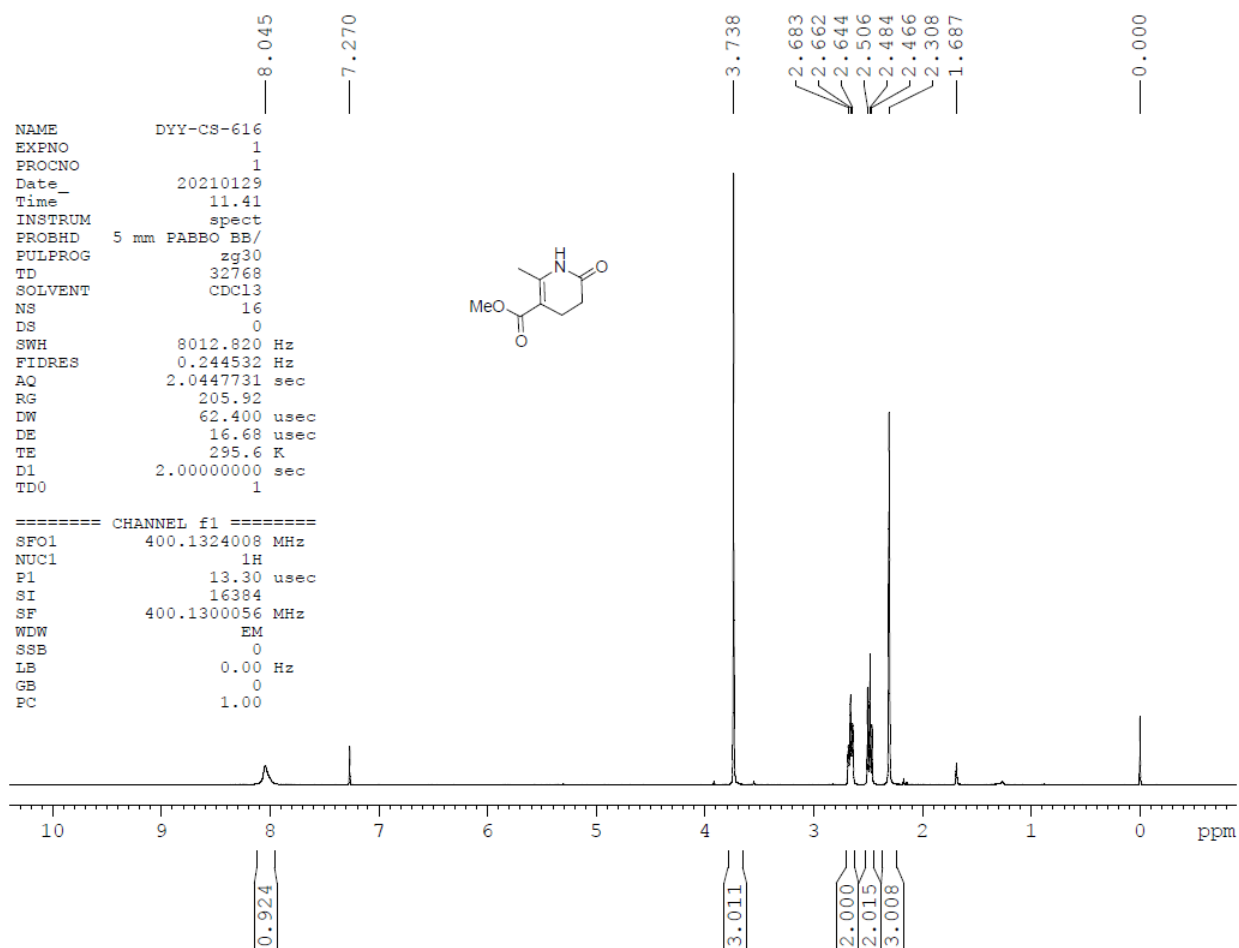

<sup>13</sup>C NMR of compound **14** (CDCl<sub>3</sub>)

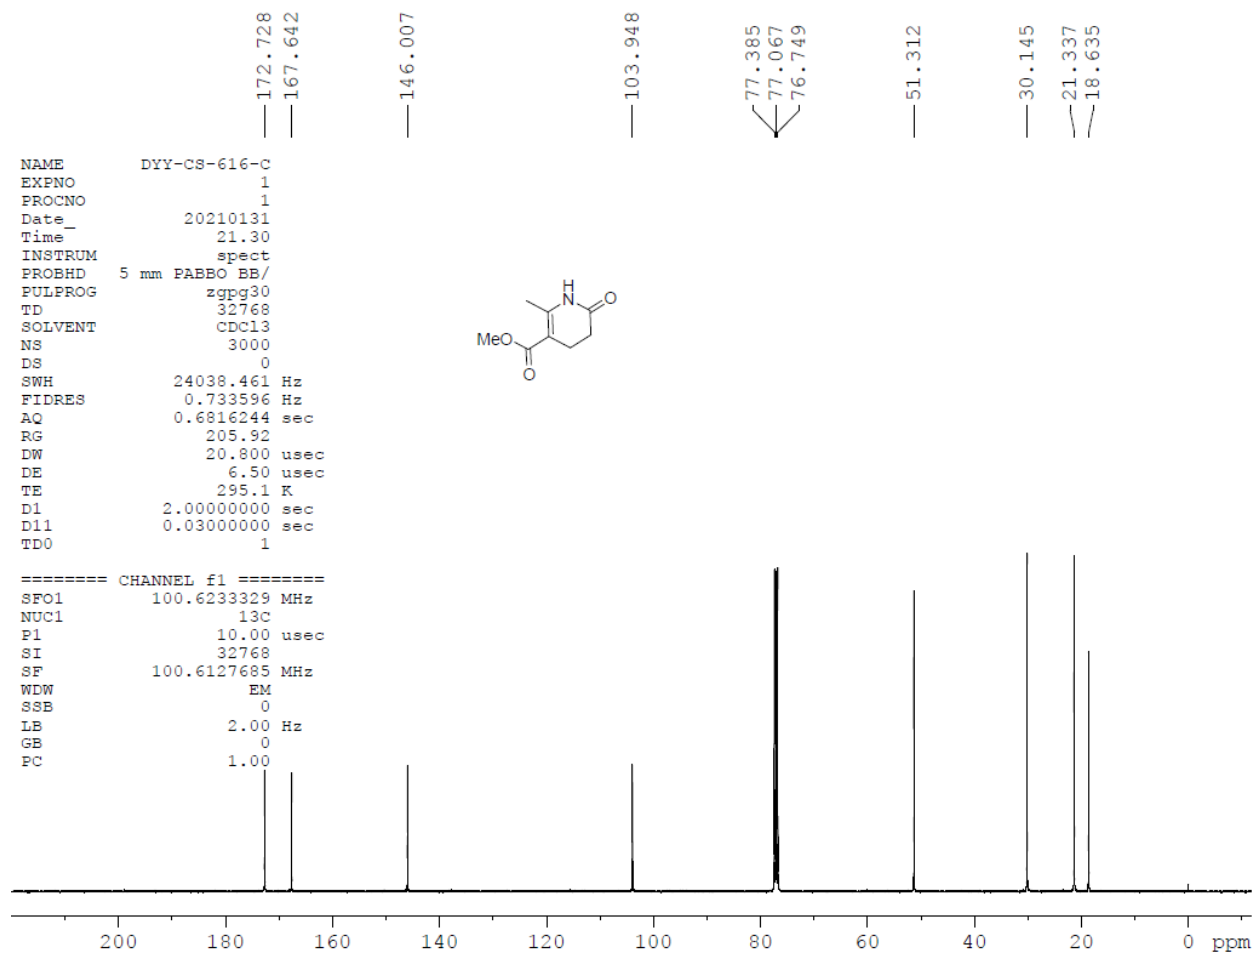

<sup>1</sup>H NMR of compound **25** (CDCl<sub>3</sub>)

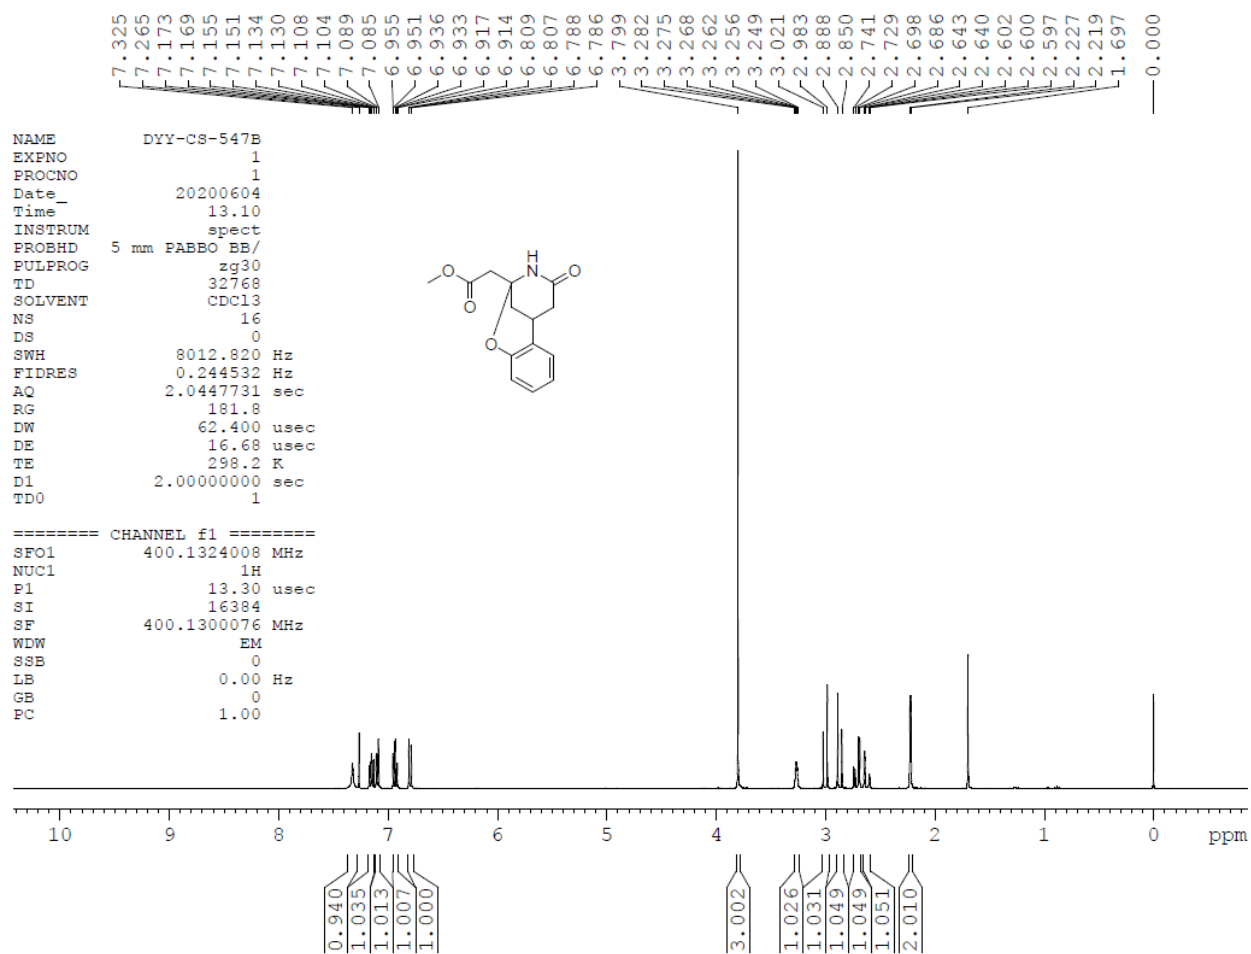

<sup>13</sup>C NMR of compound **25** (CDCl<sub>3</sub>)

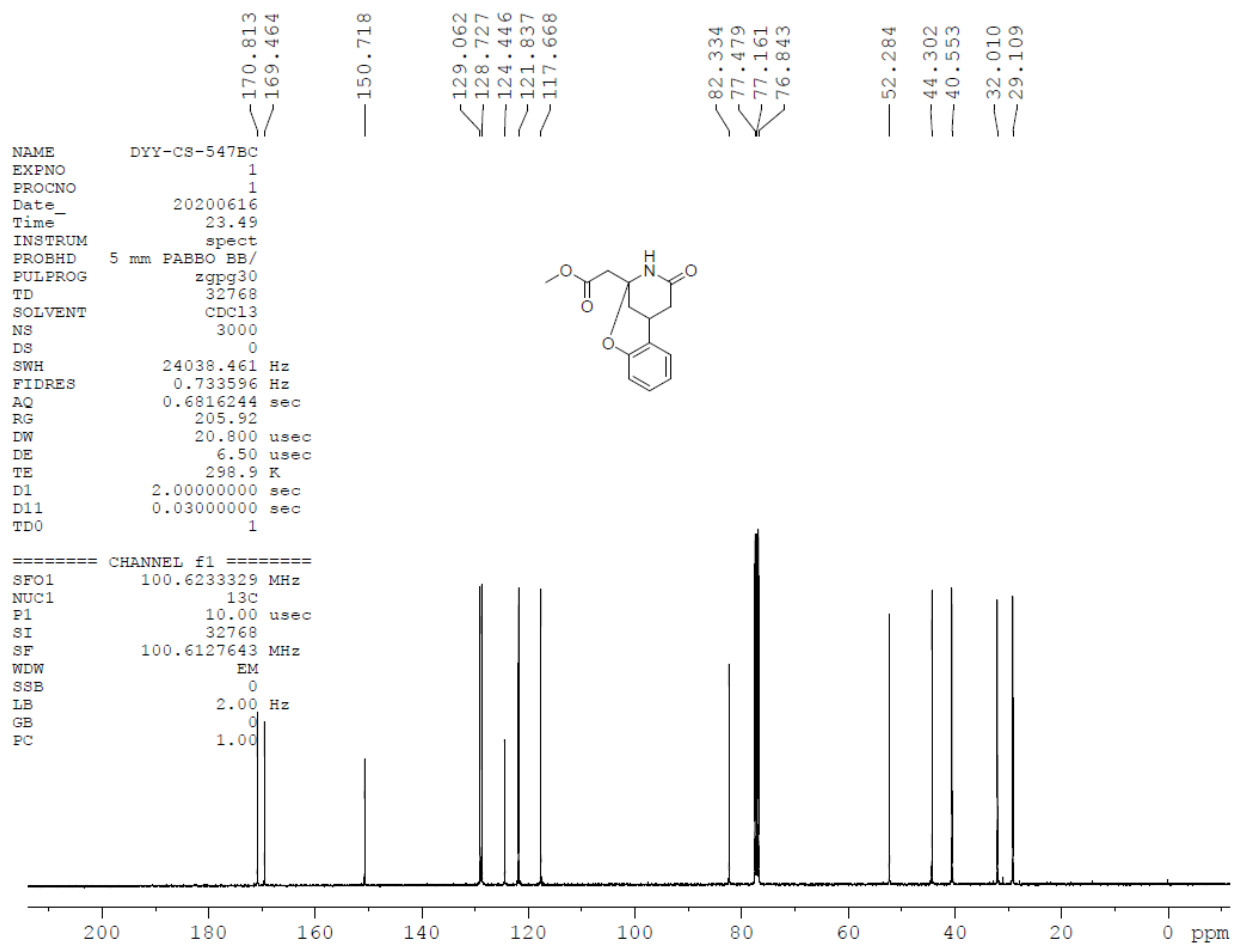

<sup>1</sup>H NMR of compound **26** (CDCl<sub>3</sub>)

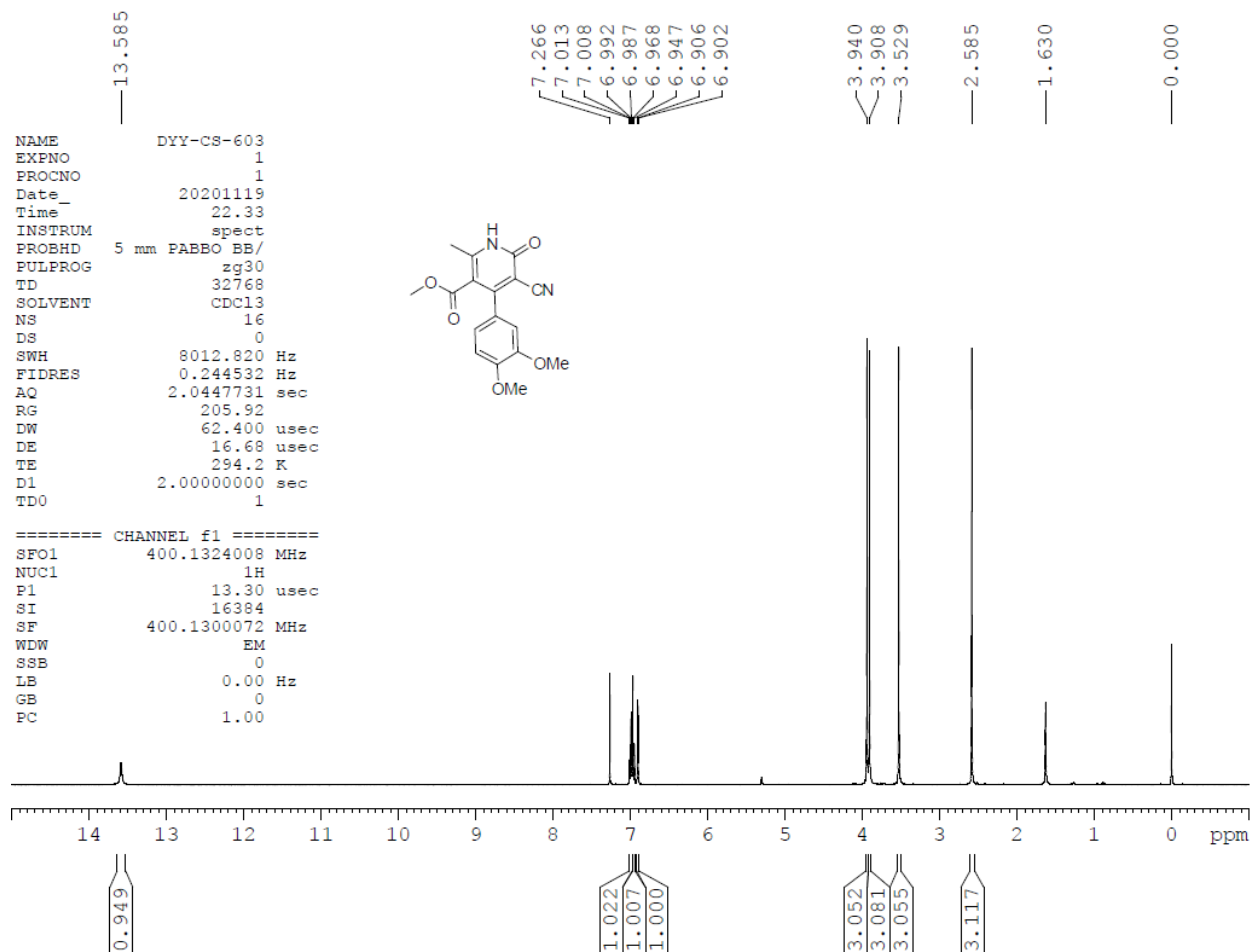

<sup>13</sup>C NMR of compound **26** (DMSO-*d*<sub>6</sub>)

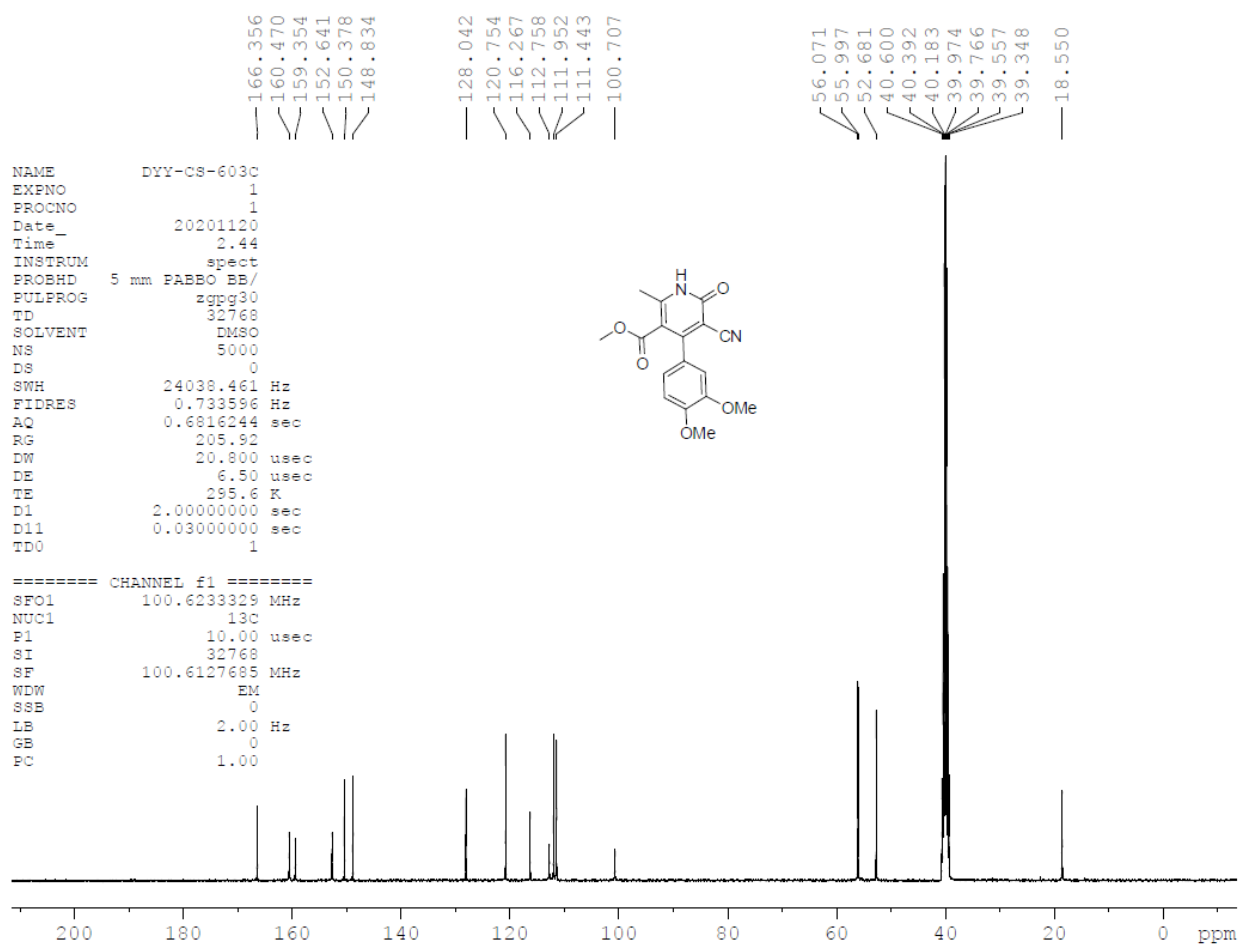

<sup>1</sup>H NMR of compound **27** (CDCl<sub>3</sub>)

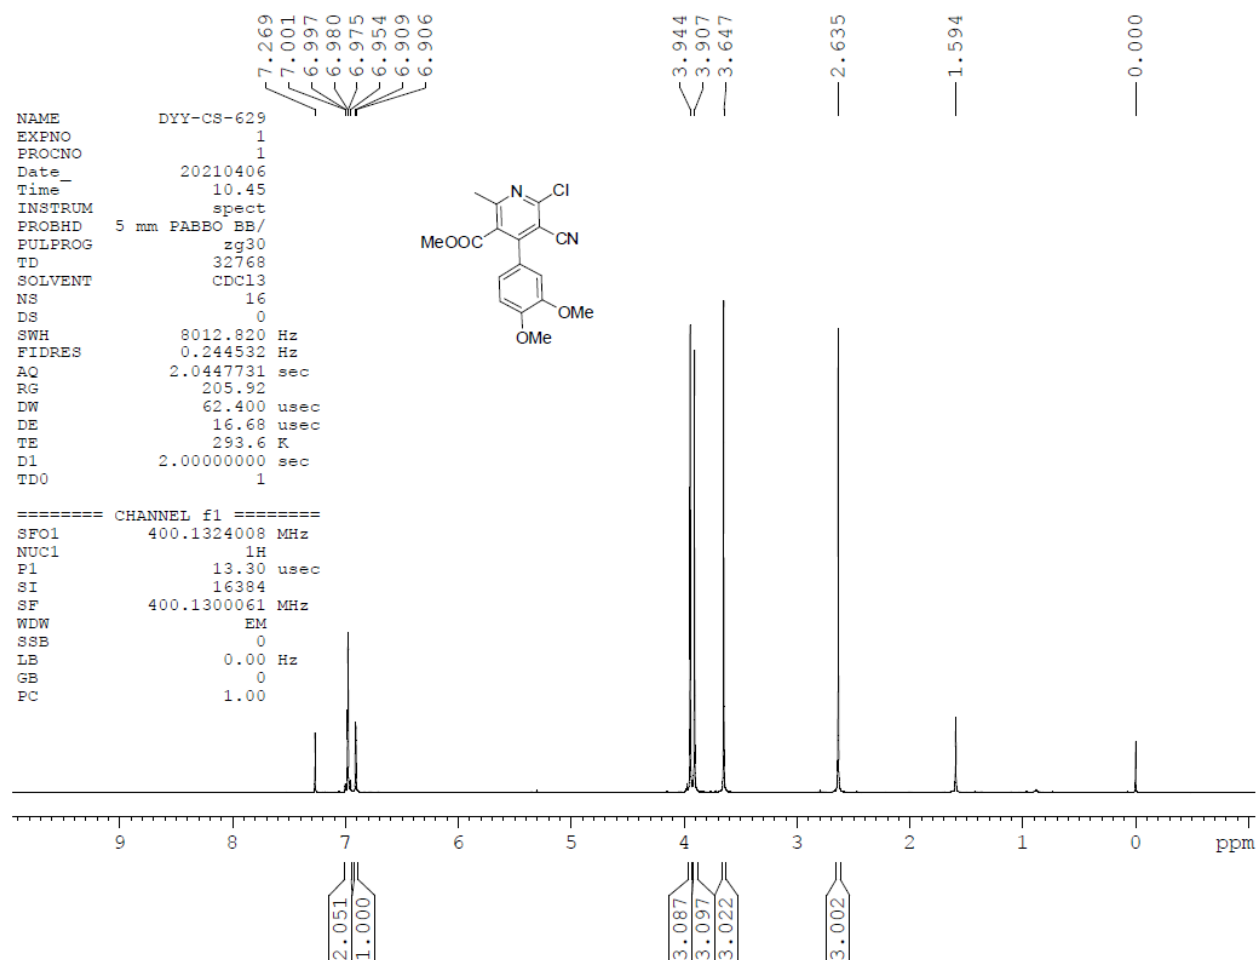

<sup>13</sup>C NMR of compound **27** (CDCl<sub>3</sub>)

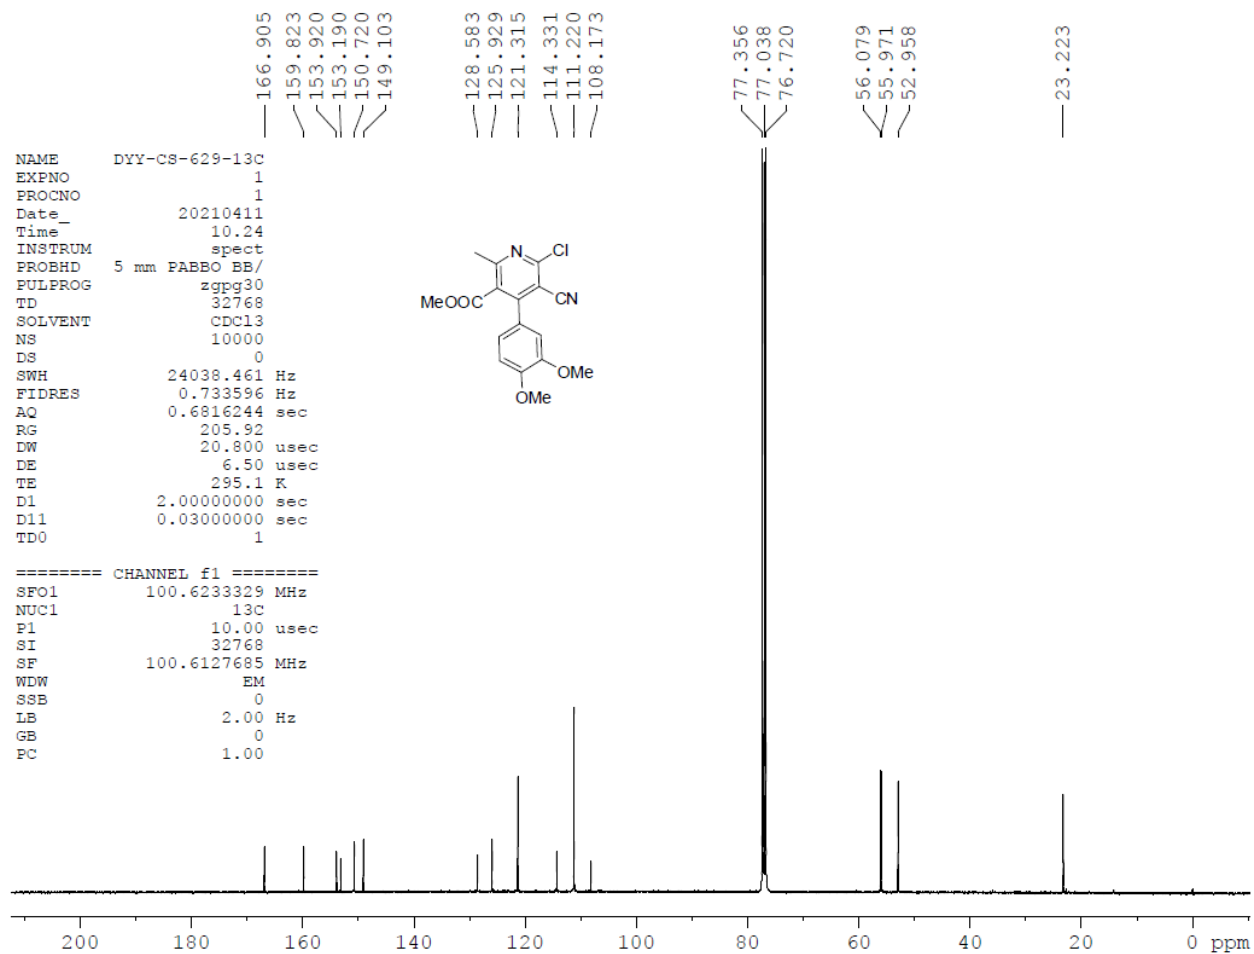

Supplement: d1ob01115d1.pdf [file d1ob01115d1.pdf]
